# Supplementary material for: How far are we from a medication use process aiming at well-informed adherent patients with long-term medications in Finland? Qualitative study
Source: PubMed Central journal article supplement — BMJ Open. 2020 Jun 21;10(6):e036526. doi: 10.1136/bmjopen-2019-036526 (PMC7307543; doi:10.1136/bmjopen-2019-036526), 2020-06-21
Supplement: bmjopen-2019-036526.draft_revisions.pdf [file bmjopen-2019-036526.draft_revisions.pdf]

# BMJ Open

BMJ Open is committed to open peer review. As part of this commitment we make the peer review history of every article we publish publicly available.

When an article is published we post the peer reviewers' comments and the authors' responses online. We also post the versions of the paper that were used during peer review. These are the versions that the peer review comments apply to.

The versions of the paper that follow are the versions that were submitted during the peer review process. They are not the versions of record or the final published versions. They should not be cited or distributed as the published version of this manuscript.

BMJ Open is an open access journal and the full, final, typeset and author-corrected version of record of the manuscript is available on our site with no access controls, subscription charges or pay-per-view fees (<http://bmjopen.bmj.com>).

If you have any questions on BMJ Open's open peer review process please email [info.bmjopen@bmj.com](mailto:info.bmjopen@bmj.com)

# BMJ Open

## How far are we from a medication use process aiming at well-informed adherent patients with long-term medications? A qualitative study

|                               |                                                                                                                                                                                                                                                                                                         |
|-------------------------------|---------------------------------------------------------------------------------------------------------------------------------------------------------------------------------------------------------------------------------------------------------------------------------------------------------|
| Journal:                      | <i>BMJ Open</i>                                                                                                                                                                                                                                                                                         |
| Manuscript ID                 | bmjopen-2019-036526                                                                                                                                                                                                                                                                                     |
| Article Type:                 | Original research                                                                                                                                                                                                                                                                                       |
| Date Submitted by the Author: | 19-Dec-2019                                                                                                                                                                                                                                                                                             |
| Complete List of Authors:     | Mononen, Niina; University of Helsinki, Faculty of Pharmacy, Division of Pharmacology and Pharmacotherapy<br>Pohjanoksa-Mäntylä, Marika ; University of Helsinki<br>Airaksinen, Marja; University of Helsinki<br>Hämeen-Anttila, Katri; Finnish Medicines Agency FIMEA, Assessment of Pharmacotherapies |
| Keywords:                     | Health policy < HEALTH SERVICES ADMINISTRATION & MANAGEMENT, Organisation of health services < HEALTH SERVICES ADMINISTRATION & MANAGEMENT, PUBLIC HEALTH, QUALITATIVE RESEARCH, HEALTH SERVICES ADMINISTRATION & MANAGEMENT                                                                            |
|                               |                                                                                                                                                                                                                                                                                                         |

SCHOLARONE™  
Manuscripts

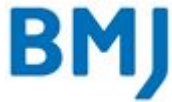

I, the Submitting Author has the right to grant and does grant on behalf of all authors of the Work (as defined in the below author licence), an exclusive licence and/or a non-exclusive licence for contributions from authors who are: i) UK Crown employees; ii) where BMJ has agreed a CC-BY licence shall apply, and/or iii) in accordance with the terms applicable for US Federal Government officers or employees acting as part of their official duties; on a worldwide, perpetual, irrevocable, royalty-free basis to BMJ Publishing Group Ltd ("BMJ") its licensees and where the relevant Journal is co-owned by BMJ to the co-owners of the Journal, to publish the Work in this journal and any other BMJ products and to exploit all rights, as set out in our [licence](#).

The Submitting Author accepts and understands that any supply made under these terms is made by BMJ to the Submitting Author unless you are acting as an employee on behalf of your employer or a postgraduate student of an affiliated institution which is paying any applicable article publishing charge ("APC") for Open Access articles. Where the Submitting Author wishes to make the Work available on an Open Access basis (and intends to pay the relevant APC), the terms of reuse of such Open Access shall be governed by a Creative Commons licence – details of these licences and which [Creative Commons](#) licence will apply to this Work are set out in our licence referred to above.

Other than as permitted in any relevant BMJ Author's Self Archiving Policies, I confirm this Work has not been accepted for publication elsewhere, is not being considered for publication elsewhere and does not duplicate material already published. I confirm all authors consent to publication of this Work and authorise the granting of this licence.

|                                             |                                                                                                                                                                                                                                                                                                                                                                                                                                                                                           |
|---------------------------------------------|-------------------------------------------------------------------------------------------------------------------------------------------------------------------------------------------------------------------------------------------------------------------------------------------------------------------------------------------------------------------------------------------------------------------------------------------------------------------------------------------|
| <b>Title</b>                                | <b>How far are we from a medication use process aiming at well-informed adherent patients with long-term medications? A qualitative study</b>                                                                                                                                                                                                                                                                                                                                             |
| <b>Authors' names</b>                       | Niina Mononen, Marika Pohjanoksa-Mäntylä, Marja Airaksinen, Katri Hämeen-Anttila                                                                                                                                                                                                                                                                                                                                                                                                          |
| <b>Address and position for each author</b> | <p>Niina Mononen, MSc (Pharm), PhD Student<br/> Marika Pohjanoksa-Mäntylä, PhD, University Lecturer<br/> Marja Airaksinen, Professor, PhD</p> <p>Clinical Pharmacy Group, Division of Pharmacology and Pharmacotherapy, Faculty of Pharmacy, University of Helsinki, 00014 University of Helsinki, Finland</p> <p>Katri Hämeen-Anttila, PhD, Research and Development Manager<br/> Assessment of Pharmacotherapies, Finnish Medicines Agency Fimea, P.O. Box 55, 00034 FIMEA, Finland</p> |
| <b>Corresponding author</b>                 | <p>Niina Mononen<br/> Clinical Pharmacy Group, Division of Pharmacology and Pharmacotherapy, Faculty of Pharmacy, University of Helsinki, 00014 University of Helsinki, Finland<br/> E-mail: niina.mononen@helsinki.fi<br/> Telephone: +358 (0) 2941 59917</p>                                                                                                                                                                                                                            |

**Word count:** 3580

**Keywords:** health policy, health services administration & management, organisation of health services, public health, qualitative research

## ABSTRACT

### Objective

The aim of this study was to investigate stakeholders' views on reaching the ultimate goal of the National Medicines Information Strategy of a well-coordinated medication use process integrating appropriate medicines information to ensure rational pharmacotherapy, particularly among chronically ill patients.

### Design

Semi-structured interviews among stakeholders involved in the National Medicines Information Network enhancing the strategy's implementation after the first three-year strategic operational period (2012-2014) in spring 2015.

### Setting

National implementation of medicines information strategy throughout the healthcare in Finland.

### Participants

Members of the National Medicines Information Network (n=79/111, participation rate 71%, representing 42/53 stakeholder organisations).

### Outcome measures

Well-implemented actions and actions needing development in the medication use process at: 1) infrastructure (*macro*), 2) healthcare professionals (*meso*), and 3) patient (*micro*) level.

### Results

Medication counselling by community pharmacists was the most effectively implemented part of the medication use process, followed by physician's actions while starting a new medication, and advice given by nurses. The major development needs concerned: 1) poor access to patient information and its transfer in healthcare, particularly the lack of reconciled medication lists and electronic health records (*macro*); 2) poor functioning medication use process in home care and social care units, such as nursing homes (*meso*); and 3) limited patient involvement in their care (*micro*).

### Conclusions

Far more actions for development than well-established practices in the medication use process were identified. Considerable improvements were reported to be needed at the infrastructure level to support the rational use of medicines at the patient level when implementing the next steps of the National Medicines Information Strategy.

## STRENGTHS AND LIMITATIONS OF THIS STUDY

- A wide range of stakeholders were interviewed providing in-depth and useful understanding how they perceived the achievement of the ultimate goal of the National Medicines Information Strategy three years after its launch.
- A majority of the stakeholder representatives were healthcare professionals, half of them being pharmacists which may have skewed the results.
- Absence of real patients with chronic illnesses and medications may distort results.
- The dynamics of the interviews may have been influenced by the fact that they were conducted as individual, pair or group interviews according to convenience of each stakeholder.
- In the conceptual model building, the breakdown of the data to macro, meso and micro levels assisted in constructing a holistic understanding of the medication use process.

er review only

## INTRODUCTION

Carrying out long-term medication is a collaborative process whereby the ultimate goal is to foster well-informed patients who are capable of, and motivated to, self-manage their medications. Team-based and patient-centered care emphasises the roles and tasks of each healthcare provider involved in the care process to ensure conduct of medication in a high-quality, safe, effective, economical and rational manner.<sup>1</sup> Part of this collaborative team should be the patients themselves so that they can take responsibility for their own care and become empowered for self-management and self-care.<sup>2</sup>

Although all healthcare professionals involved in the medication use process should have clearly determined responsibilities and tasks, there still exists ambiguity in this respect.<sup>3-5</sup> Among healthcare professionals there is uncertainty about their own roles and tasks, as well as those of other professionals.<sup>6-8</sup> If the roles and tasks are not agreed upon, it can lead to preventable risk situations, medication errors or omissions.<sup>3,9-11</sup> It can also lead to a preventable increase in the medication-related burden for patients and impair their lived experience with the medication,<sup>12</sup> e.g., through inadequate support from the social and health service system at different phases of a long-term journey with a chronic illness.<sup>13,14</sup>

Easy access to reliable and timely health information and medicines information is an integral part of the successful medication use process for both healthcare providers and medicine users.<sup>15-20</sup> Professionals and medicine users need and intentionally utilise or randomly encounter a variety of information sources in different phases of the medication use process.<sup>21</sup> The medication use process covers activities for the needs assessment for medication, selection of the medication and prescribing, dispensing, dosing and administration, patient motivation and counselling to support adherence and self-management, treatment follow-up and assessment of outcomes.<sup>22</sup> The patient-specific medication plan is an important, but often missing part of the medication use process which facilitates communication regarding the medication between the patient and participating organisations and individuals.

Even though the consistent medication use process as described above is fundamental for rational pharmacotherapy, little research has focused on evaluating the entire process. In Finland, Finnish Medicines Agency Fimea launched a National Medicines Information Strategy in 2012 with the ultimate goal of a well-implemented medication use process that

1  
2  
3 will result in well-informed and adherent patients by 2020.<sup>23</sup> The special emphasis of the  
4 Strategy is on patients with long-term medications. This study investigated stakeholders'  
5 views of reaching the goal of the Strategy at three years after its national launch in 2015.  
6  
7  
8  
9

## 10 11 **METHODS**

### 12 13 14 **Context**

15  
16  
17 In Finland, medicines information practices have been actively developed since the 1980s,  
18 especially in community pharmacies.<sup>24-28</sup> Patients have a statutory right to receive information  
19 about their medicines from their healthcare providers, physicians and pharmacists being  
20 mandated to counsel on safe and appropriate medicine use while prescribing and  
21 dispensing.<sup>29,30</sup> The current medicines policy 2020 prioritises the development of medicines  
22 information practices, particularly to improve coordination between medicines information  
23 providers and to enhance the use of medicines information sources in patient care.<sup>22</sup>  
24  
25  
26  
27  
28  
29  
30

31  
32 To implement these medicines policy actions set in 2011, Fimea established the first National  
33 Medicines Information Strategy in 2012.<sup>23</sup> The ultimate goal of the strategy is to have well-  
34 committed and motivated patients with long-term illnesses who are well aware of their care.  
35 This strategic goal is in line with the Chronic Care Model,<sup>31,32</sup> which was extensively piloted  
36 in Finland as a potential basis for a new social and health service system.<sup>33</sup> The strategy's  
37 implementation is based on the following core actions: a national medicines information  
38 network coordinated by Fimea supports that implementation and healthcare professionals'  
39 access and use of reliable information sources and services are ensured, as well as the health  
40 literacy of the general public and medicines expertise and multiprofessional medication use  
41 practices in healthcare based on national guidelines and local agreements.<sup>23</sup> The National  
42 Medicines Information Network established to promote the implementation of the National  
43 Medicines Information Strategy consists of four working groups and a coordination group  
44 involving a wide range of stakeholders representing medicines information providers and  
45 users (see Table 1).<sup>23,34</sup> The implementation of the strategy is divided into three operational  
46 periods (years 2012–2014; 2015–2017; and 2018–2020).  
47  
48  
49  
50  
51  
52  
53  
54  
55  
56  
57  
58  
59  
60



## Study design and setting

The study applied a qualitative cross-sectional design with semi-structured interviews among the members of the National Medicines Information Network. The interviews were performed after the first three-year operational period (2012–2014) of the National Medicines Information Strategy in spring 2015. During the first period of the strategy, the Network had 111 members representing 53 stakeholder organisations. First, an invitation to participate in the interview was sent to all members of the network via email. A more detailed information letter was sent to those who agreed to participate in the study.

## Interview guide

A semi-structured interview guide with two main themes and eight sub-themes focusing on the goals and actions of the National Medicines Information Strategy was developed.<sup>23</sup> The interview guide was pre-tested in two pilot interviews with six participants. No significant changes were made based on the pilot, and therefore, the data from the pilots were included in the study. The two main themes discussed in the interviews pertained to: 1) reaching the goals and implementing the actions of the National Medicines Information Strategy, and 2) actions taken by the National Medicines Information Network. This study focused on the first main theme and the following questions in the interview guide: “If you consider the figure of medication use process for a patient with chronic diseases, then: 1) what are the most crucial actions that have been implemented, and 2) what actions should be focused upon in the future in order to achieve the goal of a well-informed, adherent patient or medicine user?” The figure of the medication use process as illustrated in the strategy was shown to the participants to stimulate discussion during the interview (Fig. 1).<sup>23</sup>

Add figure 1 in here.

## Data collection

Interviews were conducted as individual, pair and group interviews depending on the preference of each stakeholder in spring 2015. The aim was to have only one stakeholder organisation in each interview. Due to the geographical location and schedules of the participants, interviews were conducted face-to-face, by telephone or via video conferencing. One moderator NM (female pharmacist, MSc, with training in qualitative interviews) facilitated and audiotaped all interviews with permission from the participants.

## Analysis

Data were analysed by applying the Framework Method that utilises both deductive and inductive content analysis (Fig. 2).<sup>35</sup> The analysis was carried out in stages using Microsoft Word and Excel (Windows 10 Home). The interviews were transcribed verbatim by a company specialised in converting to written text qualitative research data (*Stage 1*). Each transcript was repeatedly read by one researcher (NM), while listening to the audiotapes (*Stage 2*). Single words, sentences or groups of sentences related to study questions were coded by one researcher (NM) and verified by another researcher (MP-M) (*Stage 3*). Any differences of interpretation were discussed with the research group. Once the key categories were identified inductively, the transcripts were purposively read to detect any discussion that deviated from these categories and an analytical matrix was developed (*Stage 4*). Main and sub-categories were primarily developed deductively according to the medication use process<sup>23</sup> (Fig. 1) (*Stage 5*). Additionally, new main and sub-categories were inductively derived from the data. Codes were classified into main categories, and the encoded data were charted into a spreadsheet generated from the analytical matrix (*Stage 6*). Based on the existing medication use process model (Fig. 1), and complemented with participants' views identified from the interviews, a new conceptual framework of the medication use process was developed (*Stage 7*). The results are presented in accordance with two main research questions, i.e., stakeholders' views on: 1) the well-implemented actions, and 2) the actions needing development in the medication use process. The results are classified into three operational levels: infrastructure (*macro*), healthcare professional (*meso*) and patient (*micro*) level. This follows the conceptual framework applied to combine the functions of primary care with the dimensions of integrated care.<sup>36</sup> Numbers of encodings were counted according to the mentions by each participant and the summative numbers were set into the operational

1  
2  
3 levels. The standards for reporting qualitative research (SRQR) was utilised when  
4 applicable.<sup>37</sup>  
5  
6  
7

8 Add figure 2 in here.  
9

## 10 11 **Ethical considerations** 12

13  
14  
15 We followed the guidelines of the Finnish Advisory Board on Research Integrity.<sup>38</sup> According  
16 to the guidelines, the study was deemed to be exempt from requiring approval from the  
17 research ethics committee. The research plan was approved by the National Medicines  
18 Information Network. Participants were informed in writing about the study prior to the  
19 interviews. Their participation was voluntary with the opportunity to withdraw from the study  
20 at any time. The recordings and interview notes were digitally stored behind a password. All  
21 data were anonymised and were accessible only to the authors.  
22  
23  
24  
25  
26  
27  
28

## 29 **Patient and public involvement** 30

31 Patient participation was taken into account by interviewing representatives from various  
32 national patient organisations who were active partners in the National Medicines Information  
33 Network. There was no real patients or public involvement in the planning phase or design of  
34 the study. The results of the study will be discussed in the Network for further actions of the  
35 National Medicines Information Strategy.  
36  
37  
38  
39  
40

## 41 **RESULTS** 42

43  
44  
45 In total, 79 out of 111 members of the National Medicines Information Network participated  
46 in the study (participation rate 71%) representing 42 out of 53 stakeholders (Table 1).  
47 Interviews (n=43) were conducted as individual (n=22), pair (n=11) or group interviews  
48 (n=10), either face-to-face (79%, n=34), by telephone (12%, n=5), as video conferencing (7%,  
49 n=3) or as face-to-face and video conferencing (2%, n=1). Altogether, 3–6 participants  
50 attended the group interviews at a time. Four interviews included participants from more than  
51 one stakeholder organisations. A majority of the participants were pharmacists (43% of all  
52 participants, n=34), physicians (22%, n=17) and nurses (15%, n=12). Educational units were  
53 the most commonly represented stakeholder group (24% of the stakeholder organisations,  
54  
55  
56  
57  
58  
59  
60

n=10), including universities, polytechnics, vocational institutions and continuing education units.

**Table 1** Characteristics of the individual stakeholder representatives (n=79) and the stakeholder organisations (n=42) participating in the study. (n=number of individual stakeholder representatives or stakeholder organisations)

| Stakeholders by profession                                                                                        | Individual stakeholder representatives who participated in the study |      | Individual stakeholder representatives in the Network <sup>a</sup> |      |
|-------------------------------------------------------------------------------------------------------------------|----------------------------------------------------------------------|------|--------------------------------------------------------------------|------|
|                                                                                                                   | n                                                                    | %    | n                                                                  | %    |
| Pharmacists                                                                                                       | 34                                                                   | 43.0 | 41                                                                 | 36.9 |
| Physicians                                                                                                        | 17                                                                   | 21.5 | 22                                                                 | 19.8 |
| Nurses                                                                                                            | 12                                                                   | 15.2 | 15                                                                 | 13.5 |
| Others                                                                                                            | 11                                                                   | 13.9 | 21                                                                 | 18.9 |
| Practical nurses                                                                                                  | 2                                                                    | 2.5  | 2                                                                  | 1.8  |
| Healthcare students                                                                                               | 1 <sup>b</sup>                                                       | 1.3  | 4 <sup>b-e</sup>                                                   | 3.6  |
| Dentists                                                                                                          | 0                                                                    | 0    | 1                                                                  | 0.9  |
| Not known                                                                                                         | 2                                                                    | 2.5  | 5                                                                  | 4.5  |
| Altogether                                                                                                        | 79                                                                   |      | 111                                                                |      |
| Stakeholders by type of affiliation                                                                               | Stakeholder organisations that participated in the study             |      | Stakeholder organisations represented in the Network <sup>a</sup>  |      |
|                                                                                                                   | n                                                                    | %    | n                                                                  | %    |
| Healthcare centers, hospitals and hospital districts, hospital pharmacies and dispensaries, university pharmacies | 8                                                                    | 19.0 | 8                                                                  | 15.1 |
| Patient associations and organisations                                                                            | 8                                                                    | 19.0 | 10                                                                 | 18.9 |
| Professional organisations                                                                                        | 7 <sup>b,d,e</sup>                                                   | 16.7 | 8 <sup>b-e</sup>                                                   | 15.1 |
| Universities                                                                                                      | 6 <sup>b,d,e</sup>                                                   | 14.3 | 6 <sup>b,d,e</sup>                                                 | 11.3 |
| Scientific societies                                                                                              | 4 <sup>b,d,f,g</sup>                                                 | 9.5  | 5 <sup>b,d,f,g</sup>                                               | 9.4  |
| Polytechnics, vocational institutions                                                                             | 3 <sup>e,h</sup>                                                     | 7.1  | 5 <sup>e,h</sup>                                                   | 9.4  |
| National authorities                                                                                              | 2                                                                    | 4.8  | 3                                                                  | 5.7  |
| Organisations representing pharmaceutical industry                                                                | 2                                                                    | 4.8  | 2                                                                  | 3.8  |
| Continuing education units                                                                                        | 1 <sup>b</sup>                                                       | 2.4  | 1 <sup>b</sup>                                                     | 1.9  |
| Student associations                                                                                              | 1 <sup>b</sup>                                                       | 2.4  | 4 <sup>b-e</sup>                                                   | 7.5  |
| Others                                                                                                            | 0                                                                    | 0    | 1                                                                  | 1.9  |
| Altogether                                                                                                        | 42                                                                   |      | 53                                                                 |      |

<sup>a</sup>National Medicines Information Network, <sup>b</sup>pharmacy, <sup>c</sup>dentistry, <sup>d</sup>medicine, <sup>e</sup>nursing, <sup>f</sup>clinical pharmacology, <sup>g</sup>psychiatry, <sup>h</sup>practical nursing.

## Well-implemented actions in the medication use process

The new conceptual framework illustrating well-implemented actions in the medication use process consisted of ten main categories of actions (Fig. 3). Of these, seven were derived deductively from the previous medication use process model (Fig. 1) and three were inductively derived from the data (Fig. 3). All the inductively derived categories were at the infrastructure (*macro*) level. Around half of the participants (52%) reported well-implemented actions, mostly at the meso level (i.e., healthcare professionals). Of these actions, medication

1  
2  
3 counselling by community pharmacists was considered as the best implemented (n=26  
4 mentions), followed by physicians' performance while starting a medication (n=14), and  
5 advice and guidance provided by nurses (n=14) (Appendix A).  
6  
7  
8  
9

10 Add figure 3 in here.  
11  
12

13 Very few mentions of the well-implemented actions at the infrastructure (*macro*) level were  
14 present (Fig. 3). These related to the patient information transfer and electronic health records  
15 (EHRs) (n=4 mentions of being well-implemented) and multiprofessional collaboration (n=2),  
16 while none of the stakeholders mentioned management of the entire medication use process  
17 (n=0) or specialist services (n=0) as well-implemented.  
18  
19  
20  
21  
22

### 23 **Actions needing development in the medication use process**

24  
25  
26

27 The stakeholders mentioned far more actions for development than well-established practices  
28 in the medication use process (211 vs. 68 mentions, respectively) (Fig. 3 and 4). Almost all  
29 participants (94%) raised at least one area for improvement (Fig. 4, Appendix A). The highest  
30 number of mentions indicating a need for development concerned medication use process in  
31 home care and social care (*meso*) (n=34), patient information transfer and EHRs, including  
32 update medication lists (*macro*) (n=33), and patient's management with the medication  
33 (*micro*) (n=27). At the infrastructure (*macro*) level, management of the entire medication use  
34 process (n=24) and multiprofessional collaboration (n=23) were also frequently mentioned as  
35 areas for development.  
36  
37  
38  
39  
40  
41  
42  
43  
44

45 Add figure 4 in here.  
46  
47

48 In the medication use process in home care and social care units, such as nursing homes, most  
49 of the concerns related to skills, competences and inadequate training of practical nurses to  
50 appropriately manage medications of their older clients (Fig. 4). A need for additional training  
51 in pharmacotherapy was raised, particularly for home care and nursing home staff to meet the  
52 requirements of their current work duties in geriatric care. Inadequate patient information  
53 transfer between care units and limited availability of EHRs in the medication use process  
54 were among the major concerns as not all professionals involved in the care team have access  
55 to complete and accurate patient information, such as laboratory results, or when the patient  
56  
57  
58  
59  
60

1  
2  
3 is transferred from a care unit to another. In addition, many stakeholders reported that the  
4 management of the entire medication use process needed development indicating  
5 fragmentation, lack of coordination and poor collaboration between different healthcare  
6 professionals and between professionals and patients. They also expressed concerns on  
7 treatment monitoring as it was not commonly conducted very systematically.  
8  
9  
10  
11  
12

13 Finally, poor patient involvement during the entire medication use process was a concern  
14 reflecting a lack of motivation or adherence to treatment and an inability or unwillingness to  
15 communicate with healthcare professionals (Fig. 4). A further concern was that patients do  
16 not always have updated medication lists or treatment plans, which may not only challenge  
17 healthcare professionals at the point of prescribing and dispensing medicines, but also patients  
18 while using medicines at home. Additionally, patients' limited skills in searching reliable  
19 health information and medicines information and insufficient medication counselling for  
20 particular patient groups, such as the deaf, people with vision impairment and using multiple  
21 medications, were identified as areas needing attention.  
22  
23  
24  
25  
26  
27  
28  
29

## 30 **DISCUSSION**

31  
32  
33 The stakeholders' interviews provided rich data useful to understanding how the stakeholders  
34 perceived the achievement of the ultimate goal of the National Medicines Information  
35 Strategy at three years after launch.<sup>23</sup> Although some well-implemented actions in the  
36 medication use process were identified, the stakeholder representatives found even more  
37 actions requiring improvement at all levels of implementation. In particular, considerable  
38 improvements were reported to be required at the infrastructure level to support the rational  
39 use of medicines at the individual patient level. The primary infrastructural development  
40 needs concerned the availability of update medication lists and other patient information in  
41 the electronic form, coordination of the entire medication use process, and defining the roles  
42 and responsibilities of professionals and patients involved in the care process. These findings  
43 are in line with other recent observations from Finland.<sup>39-42</sup>  
44  
45  
46  
47  
48  
49  
50  
51  
52  
53

54 The starting point of the National Medicines Information Strategy in 2012 was purely to  
55 improve coordination of medicines information and medicines information practices in  
56 healthcare.<sup>23</sup> However, this first strategy's evaluation in 2015 has already demonstrated that  
57 medicines information and its receipt from various sources cannot be separated from the  
58  
59  
60

1  
2  
3 medication use process. Furthermore, medicines information cannot be separated from patient  
4 information. This was indicated by the finding that the availability of the reconciled  
5 medication list and EHRs were highly prioritised by the stakeholders as actions to improve  
6 the management of the entire medication use process. An update medication list is essential  
7 for professionals and patients. For example, guidelines for patient-centered therapeutic  
8 counselling assume that the practitioner should review available patient information before  
9 the encounter and use the information gathered to determine what to discuss and agree on the  
10 treatment with the medicine user.<sup>26,28,43</sup>

11  
12  
13 Since this evaluation was conducted in 2015, shortcomings found in the infrastructure of the  
14 medication use process related to the coordination and availability of EHRs have been  
15 recognised in the ongoing Rational Pharmacotherapy Action Plan 2022.<sup>39</sup> The Government  
16 Program<sup>44,45</sup> based action plan is intended to strengthen the actions at the infrastructure level  
17 which were minor in 2015. At the same time, it extends the scope of development towards the  
18 meta level, including health and medicines policy making that can facilitate infrastructural  
19 changes in the medication use process through information guidance, resource allocation and  
20 legislation.<sup>46</sup>

21  
22  
23 According to the stakeholders, challenges in implementing the medication use process appear  
24 to be the greatest in primary care, especially in home care and social care units such as in  
25 nursing homes. This means social and healthcare units providing care for older adults in the  
26 poorest conditions. The result may reflect that the Finnish population is aging rapidly and the  
27 care system has not been adequately prepared for the growing need, for example, to train care  
28 personnel in geriatric pharmacotherapy to safely manage the medications. This is particularly  
29 the case for practical nurses whose responsibility for medication management in geriatric care  
30 units has increased remarkably even though their pharmacotherapy training is limited. The  
31 same trend and challenges have been found in other research and development programs in  
32 Finland and other countries.<sup>40,47</sup> The challenge of safe management of medications and  
33 polypharmacy of older adults have been prioritised globally in the ongoing WHO Global  
34 Patient Safety Program “Medication Without Harm”.<sup>48</sup> Further research should focus on  
35 geriatric care units in primary and social care to better understand the systems-based root  
36 causes and contributing factors of actual and potential risks in the current medication use  
37 processes.

1  
2  
3 Patient involvement in the medication use process was strongly communicated as an area for  
4 development by professionals and representatives of patients. It is worth remembering that a  
5 majority of the interviewees were health professionals, even where they represented the voice  
6 of patients. Thus, the results are skewed to a professional opinion even in the patient  
7 perspective. Nevertheless, the results send a clear message that patients' involvement in their  
8 long-term medication should be significantly increased. To be successful, research and actions  
9 should focus on patient approach in the implementation of long-term medications. Only the  
10 patients themselves can describe the issues that matter to them affecting their motivation for  
11 treatment, success of self-management and empowerment. Even people with poor health  
12 literacy want to know about their medications.<sup>49</sup> However, a population survey from Finland  
13 indicated that the proportion of adult medicine users who had received information about their  
14 medicines from professionals or any source had decreased remarkably during 1999–2014.<sup>21</sup>  
15 Infrastructural factors leading to poor access to patient and medicines information and poor  
16 adherence, such as lack of update medication lists and treatment plans, and lack of personal  
17 communication with care providers should be further investigated from a patient  
18 perspective.<sup>13,50</sup> These aspects have been recognised in Finland in the ongoing Rational  
19 Pharmacotherapy Action Plan for forming partnerships along with improving overall  
20 management and coordination of the medication use process as keynotes of the Plan.<sup>39</sup>  
21  
22  
23  
24  
25  
26  
27  
28  
29  
30  
31  
32  
33  
34  
35

### 36 **Strengths and limitations of this study**

37  
38  
39 Semi-structured interviews amply covered the whole range of stakeholders actively involved  
40 in implementing the National Medicines Information Strategy. They can be assumed to be  
41 informants with the best understanding of the topic of research. However, a majority of the  
42 stakeholder representatives were healthcare professionals, half of them being pharmacists  
43 which may have skewed the results. There was also an absence of real patients with chronic  
44 illnesses and medications which may distort results. The dynamics of the interviews may have  
45 been influenced by the fact that they were conducted as individual, pair or group interviews  
46 according to convenience of each stakeholder. The data from different types of interviews  
47 were combined and the relative power of the opinions was determined by counting the  
48 mentions for each action. The profession or stakeholder group was not specified during the  
49 analysis, as the aim was to obtain an overall understanding of the implementation of  
50 medication use process rather than to compare views between professions or stakeholders.  
51  
52  
53  
54  
55  
56  
57  
58  
59  
60



1  
2  
3 The figure of the medication use process was an important tool in the interviews to keep the  
4 discussion focused on core issues.  
5  
6  
7

8  
9 In the conceptual model building, it was useful to use the breakdown of the data to macro,  
10 meso and micro levels. *Trustworthiness* of the analysis process was confirmed in every phase,  
11 including the preparation, organisation and reporting of results.<sup>51</sup> To ensure the *credibility*, a  
12 previously known model of a medication use process<sup>23</sup> was used as an analysis matrix,  
13 supplemented with the main and sub-categories identified inductively from the data.  
14 Additionally, a theoretical method used previously in healthcare research<sup>35</sup> was applied in  
15 analysing data to strengthen *credibility*. To increase the *comprehensivity* of the study, two  
16 researchers – and when necessary the whole research group – were involved in the data  
17 analysis process. The content and structure of concepts created by content analysis were  
18 illustrated with the examples of quotations from various participants to indicate  
19 *conformability* and *objectivity*. The models created in this study may be used when evaluating  
20 the medication use process in other social and healthcare settings (*transferability*).  
21  
22  
23  
24  
25  
26  
27  
28  
29

### 30 **Implications and future research**

31  
32  
33  
34 The medication use process of chronically ill patients using long-term medications requires  
35 development at every level of implementation. The major development needs in the  
36 infrastructure concern the coordination of care, transfer of patient information between care  
37 units, availability of a reconciled medication list, and local and national agreements on  
38 responsibilities of patients and professionals involved in the medication use process. The most  
39 urgent development needs at professional level focus on the entire medication use process in  
40 primary and social care, particularly in geriatric units where practical nurses' competences do  
41 not meet their actual work responsibilities. The current medication use process lacks genuine  
42 patient-centeredness, manifested by a lack of adherence, motivation and communication, and  
43 the inability of patients to retrieve information. Patients on long-term medications need to be  
44 better involved in implementing their treatment by improving empowerment and partnership,  
45 and by finding new ways to support self-management and treatment commitment.  
46  
47  
48  
49  
50  
51  
52  
53  
54  
55  
56  
57  
58  
59  
60

## CONCLUSIONS

Weaknesses in the infrastructure of the medication use process reflecting on the transfer of patient information, poorly functioning medication use processes in primary care and limited participation of patients in their care are priority areas while implementing the next steps of the National Medicines Information Strategy. Many of the challenges identified in this evaluation have been taken into consideration in the strategy's implementation since 2015, the major challenges also in the Rational Pharmacotherapy Action Plan 2018–2022 by the Ministry of Social Affairs and Health.

---

**Acknowledgements** The authors gratefully acknowledge the members of the Finnish National Medicines Information Network who participated in this study. The authors acknowledge the Elli Turunen Fund of the Finnish Cultural Foundation for providing funding. The authors warmly thank Perihan Ipek for assistance in collecting the data, and AMNielsen ApS and Chelsea Schneider for proofreading the manuscript.

**Contributors** NM, MA, MP-M and KH-A have been involved in designing the study, developing the interview guide, planning the analysis and reporting this particular study. NM performed the interviews and data analysis. MP-M verified the codings of the data. MA, MP-M and KH-A contributed in the interpretation of the data. NM prepared the initial draft of the manuscript. MA, MP-M and KH-A critically reviewed and revised the manuscript. All authors read and gave the final approval of the version to be published.

**Funding** This research was supported by the Elli Turunen Fund of the Finnish Cultural Foundation. The sponsors had no role in design and conduct of the study; collection, management, analysis, and interpretation of the data; or in preparation, review, or approval of the manuscript.

**Competing interests** None declared.

**Patient consent for publication** Not required.

**Data availability statement** No additional data available.

**REFERENCES**

- 1 World Health Organization. Innovative care for chronic conditions: Building blocks for actions. Global report. World Health Organization, 2002. [www.who.int/chp/knowledge/publications/iccreport/en/](http://www.who.int/chp/knowledge/publications/iccreport/en/) (Accessed 10 Dec 2019).
- 2 World Health Organization. Adherence to long-term therapies: Evidence for action. World Health Organization, 2003. [www.who.int/chp/knowledge/publications/adherence\\_report/en/](http://www.who.int/chp/knowledge/publications/adherence_report/en/) (Accessed 10 Dec 2019).
- 3 Celio J, Ninane F, Bugnon O, Schneider MP. Pharmacist-nurse collaborations in medication adherence-enhancing interventions: A review. *Patient Educ Couns* 2018;101:1175–92.
- 4 Olsen CF, Bergland A, Debesay J, Bye A, Langaas AG. Striking a balance: Health care providers' experiences with home-based, patient-centered care for older people – A meta-synthesis of qualitative studies. *Patient Educ Couns* 2019;102:1991–2000.
- 5 Toivo T, Dimitrow M, Puustinen J, et al. Coordinating resources for prospective medication risk management of older home care clients in primary care: Procedure development and RCT study design for demonstrating its effectiveness. *BMC Geriatr* 2018;18:74.
- 6 Elvey R, Hassell K, Hall J. Who do you think you are? Pharmacists' perceptions of their professional identity. *Int J Pharm Pract* 2013;21:322–32.
- 7 Kusi-Appiah E, Dahlke S, Stahlke S. Nursing care providers' perceptions on their role contributions in patient care: An integrative review. *J Clin Nurs* 2018;27:3830–45.
- 8 Lawrence RA, McLoone JK, Wakefield CE, Cohn RJ. Primary care physicians' perspectives of their role in cancer care: A systematic review. *J Gen Intern Med* 2016;31:1222–36.
- 9 Berland A, Bentsen SB. Medication errors in home care: A qualitative focus group study. *J Clin Nurs* 2017;26:3734–41.
- 10 Teinilä T, Kaunisvesi K, Airaksinen M. Primary care physicians' perceptions of medication errors and error prevention in cooperation with community pharmacists. *Res Social Adm Pharm* 2011;7:162–79.
- 11 van Sluisveld N, Zegers M, Natsch S, Wollersheim H. Medication reconciliation at hospital admission and discharge: Insufficient knowledge, unclear task reallocation and lack of collaboration as major barriers to medication safety. *BMC Health Serv Res* 2012;12:170.
- 12 Mohammed AM, Moles RJ, Chen TF. Medication-related burden and patients' lived experience with medicine: A systematic review and metasynthesis of qualitative studies. *BMJ Open* 2016;6:e010035.

- 1  
2  
3 13 Kekäle M. Chronic myeloid leukemia patients' adherence to tyrosine kinase inhibitors in  
4 Finland: A journey of eighty-six patients [dissertation]. University of Helsinki, 2016.  
5 <http://urn.fi/URN:ISBN:978-951-51-2353-4>.  
6  
7  
8 14 Puspitasari HP, Aslani P, Krass I. Pharmacists' and consumers' viewpoints on counselling  
9 on prescription medicines in Australian community pharmacies. *Int J Pharm Pract*  
10 2010;18:202–8.  
11  
12 15 Chisholm-Burns MA, Lee JK, Spivey CA, et al. US pharmacists' effect as team members  
13 on patient care: Systematic review and meta-analyses. *Med Care* 2010;48:923–33.  
14  
15 16 European Commission. High Level Pharmaceutical Forum 2005-2008: Conclusions and  
16 recommendations. European Communities, 2008.  
17 [https://publications.europa.eu/en/publication-detail/-/publication/4fddf639-47cc-4f90-9964-](https://publications.europa.eu/en/publication-detail/-/publication/4fddf639-47cc-4f90-9964-142757d2515a)  
18 [142757d2515a](https://publications.europa.eu/en/publication-detail/-/publication/4fddf639-47cc-4f90-9964-142757d2515a) (Accessed 10 Dec 2019).  
19  
20  
21 17 International Pharmaceutical Federation. Medicines information: strategic development.  
22 The Hague: International Pharmaceutical Federation, 2017.  
23 [www.fip.org/www/streamfile.php?filename=fip/publications/2017-01-Medicines-](http://www.fip.org/www/streamfile.php?filename=fip/publications/2017-01-Medicines-information-strategic-development.pdf)  
24 [information-strategic-development.pdf](http://www.fip.org/www/streamfile.php?filename=fip/publications/2017-01-Medicines-information-strategic-development.pdf) (Accessed 10 Dec 2019).  
25  
26  
27 18 Ryan R, Santesso N, Lowe D, et al. Interventions to improve safe and effective medicines  
28 use by consumers: An overview of systematic reviews. *Cochrane Database Syst Rev*  
29 2014;CD007768.  
30  
31 19 Van Camp YP, Van Rompaey B, Elseviers MM. Nurse-led interventions to enhance  
32 adherence to chronic medication: Systematic review and meta-analysis of randomised  
33 controlled trials. *Eur J Clin Pharmacol* 2013;69:761–70.  
34  
35  
36 20 Zolnieriek KBH, DiMatteo MR. Physician communication and patient adherence to  
37 treatment: A meta-analysis. *Med Care* 2009;47:826–34.  
38  
39  
40 21 Mononen N, Airaksinen MSA, Hämeen-Anttila K, Helakorpi S, Pohjanoksa-Mäntylä M.  
41 Trends in the receipt of medicines information among Finnish adults in 1999–2014: A  
42 nationwide repeated cross-sectional survey. *BMJ Open* 2019;9:e026377.  
43  
44  
45 22 Ministry of Social Affairs and Health. Medicines Policy 2020: Towards efficient, safe,  
46 rational and cost effective use of medicines. Publications of the Ministry of Social Affairs  
47 and Health, 2011. <http://urn.fi/URN:ISBN:978-952-00-3165-7> (Accessed 10 Dec 2019).  
48  
49  
50 23 Finnish Medicines Agency Fimea. Rational use of medicines through information and  
51 guidance – Medicines information services: Current state and strategy for 2020. Serial  
52 Publication Fimea Develops, Assesses and Informs, 2012. [http://urn.fi/URN:ISBN:978-952-](http://urn.fi/URN:ISBN:978-952-5624-21-2)  
53 [5624-21-2](http://urn.fi/URN:ISBN:978-952-5624-21-2) (Accessed 10 Dec 2019).  
54  
55 24 Airaksinen M, Ahonen R, Enlund H. The questions to ask about your medicines  
56 campaign – An evaluation of pharmacists and the public's response. *Med Care*  
57 1998;36:422–7.  
58  
59  
60

- 1  
2  
3 25 Kansanaho H. Implementation of the principles of patient counselling into practice in  
4 Finnish community pharmacies [dissertation]. University of Helsinki, 2006.  
5 <http://urn.fi/URN:ISBN:952-10-2877-7>.  
6  
7  
8 26 Mononen N, Järvinen R, Hämeen-Anttila K, et al. A national approach to medicines  
9 information research: A systematic review. *Res Social Adm Pharm* 2018;14:1106–24.  
10  
11 27 Pohjanoksa-Mäntylä M. Medicines information sources and services for consumers: A  
12 special focus on the Internet and people with depression [dissertation]. University of  
13 Helsinki, 2010. <http://urn.fi/URN:ISBN:978-952-10-6128-8>.  
14  
15  
16 28 Puumalainen I. Development of instruments to measure the quality of patient counselling  
17 [dissertation]. University of Kuopio, 2005. <http://urn.fi/URN:ISBN:951-27-0053-0>.  
18  
19 29 Medicines Act (Finland) 395/1987. [https://www.finlex.fi/fi/laki/ajantasa/1987/](https://www.finlex.fi/fi/laki/ajantasa/1987/19870395)  
20 [19870395](https://www.finlex.fi/fi/laki/ajantasa/1987/19870395) (Accessed 10 Dec 2019).  
21  
22  
23 30 Decree on the prescription of medicines 1088/2010.  
24 <https://www.finlex.fi/fi/laki/alkup/2010/20101088> (Accessed 10 Dec 2019).  
25  
26 31 Wagner E.H. Chronic disease management: What will it take to improve care for chronic  
27 illness? *Eff Clin Pract* 1998;1:2–4.  
28  
29  
30 32 Wagner EH, Austin BT, Hindmarsh M, Schaefer J, Bonomi A. Improving chronic illness  
31 care: Translating evidence into action. *Health Aff (Millwood)* 2001;20:64–78.  
32  
33 33 Nikander J, Tuominen-Thuesen M. National development programme for social welfare  
34 and health care (KASTE 2010–2015) External evaluation – Final report. Reports and  
35 memorandums of the Ministry of Social Affairs and Health, 2016.  
36 <http://urn.fi/URN:ISBN:978-952-00-3800-7> (Accessed 10 Dec 2019).  
37  
38  
39 34 Hämeen-Anttila K, Luhtanen S, Airaksinen M, Pohjanoksa-Mäntylä M. Developing a  
40 national medicines information strategy in Finland – A stakeholders’ perspective on the  
41 strengths, challenges and opportunities in medicines information. *Health Policy*  
42 2013;111:200–5.  
43  
44 35 Gale NK, Heath G, Cameron E, Rashid S, Redwood S. Using the framework method for  
45 the analysis of qualitative data in multi-disciplinary health research. *BMC Med Res*  
46 *Methodol* 2013;13:117.  
47  
48  
49 36 Valentijn PP, Schepman SM. Understanding integrated care: A comprehensive  
50 conceptual framework based on the integrative functions on primary care. *Int J Integr Care*  
51 2013;13:e010.  
52  
53  
54 37 O'Brien BC, Harris IB, Beckman TJ, Reed DA, Cook DA. Standards for reporting  
55 qualitative research: a synthesis of recommendations. *Acad Med* 2014;89:1245–51.  
56  
57 38 Finnish National Board on Research Integrity TENK. The ethical principles of research  
58 with human participants and ethical review in the human sciences in Finland.  
59 [www.tenk.fi/sites/tenk.fi/files/Ihmistieteiden\\_eettisen\\_ennakkoarviointin\\_ohje\\_2019.pdf](http://www.tenk.fi/sites/tenk.fi/files/Ihmistieteiden_eettisen_ennakkoarviointin_ohje_2019.pdf)  
60 (Accessed 10 Dec 2019).

- 1  
2  
3 39 Hämeen-Anttila K, Närhi U, Tahvanainen H. Rational Pharmacotherapy action plan –  
4 Final report. Reports and memorandums of the Ministry of Social Affairs and Health, 2018.  
5 <http://urn.fi/URN:ISBN:978-952-00-3930-1> (Accessed 10 Dec 2019).  
6  
7  
8 40 Kallio S, Kumpusalo-Vauhkonen A, Järvensivu T, Mäntylä A, Pohjanoksa-Mäntylä M,  
9 Airaksinen M. Towards interprofessional networking in medication management of the  
10 aged: Current challenges and potential solutions in Finland. *Scand J Prim Health Care*  
11 2016;34:368–76.  
12  
13 41 Keskimäki I, Tynkkynen LK, Reissell E, et al. Finland: Health system review. *Health*  
14 *Systems in Transition* 2019;21:1–166.  
15  
16  
17 42 Kilpeläinen K, Parikka S, Koponen P, et al. Finnish experiences of health monitoring:  
18 Local, regional, and national data sources for policy evaluation. *Glob Health Action*  
19 2016;9:28824.  
20  
21  
22 43 United States Pharmacopeia. Medication counselling behavior guidelines. United States  
23 Pharmacopeia, 1997.  
24  
25 44 Prime Minister's Office. Finland, a land of solutions – Strategic programme of Prime  
26 Minister Juha Sipilä's Government 29 May 2015. Government Publications, 2015.  
27 [https://vnk.fi/documents/10184/1427398/Ratkaisujen+Suomi\\_EN\\_YHDISTETTY\\_netti.pdf/](https://vnk.fi/documents/10184/1427398/Ratkaisujen+Suomi_EN_YHDISTETTY_netti.pdf/8d2e1a66-e24a-4073-8303-ee3127fbfcac/Ratkaisujen+Suomi_EN_YHDISTETTY_netti.pdf)  
28 [8d2e1a66-e24a-4073-8303-ee3127fbfcac/Ratkaisujen+Suomi\\_EN\\_YHDISTETTY\\_netti.pdf](https://vnk.fi/documents/10184/1427398/Ratkaisujen+Suomi_EN_YHDISTETTY_netti.pdf/8d2e1a66-e24a-4073-8303-ee3127fbfcac/Ratkaisujen+Suomi_EN_YHDISTETTY_netti.pdf)  
29 (Accessed 10 Dec 2019).  
30  
31  
32 45 Finnish Government. Programme of Prime Minister Antti Rinne's Government 6 June  
33 2019: inclusive and competent Finland – A socially, economically and ecologically  
34 sustainable society. Publications of the Finnish Government, 2019.  
35 <http://urn.fi/URN:ISBN:978-952-287-760-4> (Accessed 10 Dec 2019).  
36  
37  
38 46 Guler S, Hurton, S, winn MC, Molinari M. Levels in decision making and techniques for  
39 clinicians. *International Journal of Digestive Diseases* 2015;1.  
40  
41  
42 47 Sawan M, Jeon YH, Chen TF. Relationship between organizational culture and the use of  
43 psychotropic medicines in nursing homes: A systematic integrative review. *Drugs Aging*  
44 2018;35:189–211.  
45  
46  
47 48 World Health Organization. Medication without harm: Global patient safety challenge on  
48 medication safety. World Health Organization, 2017.  
49 [www.who.int/patientsafety/medication-safety/medication-without-harm-brochure/en/](http://www.who.int/patientsafety/medication-safety/medication-without-harm-brochure/en/)  
50 (Accessed 10 Dec 2019).  
51  
52  
53 49 Cordina M, Hämeen-Anttila K, Lauri J, Tabone S, Enlund H. Health and medication  
54 literacy and the desire to participate in pharmacotherapy decision making – Comparison of  
55 two countries. *Res Social Adm Pharm* 2018;14:817–23.  
56  
57  
58 50 Airaksinen M, Hämeen-Anttila K, Saastamoinen L. Effective use of research data:  
59 Research strategy for rational pharmacotherapy 2018–2022. Reports and memorandums of  
60 the Ministry of Social Affairs and Health, 2018. <http://urn.fi/URN:ISBN:978-952-00-3905-9>  
(Accessed 10 Dec 2019).

1  
2  
3 51 Elo S, Kääriäinen M, Kanste O, Pölkki T, Utriainen K, Kyngäs H. Qualitative content  
4 analysis: A focus on trustworthiness. *SAGE Open* 2014;4.  
5  
6  
7  
8  
9  
10  
11  
12  
13  
14  
15  
16  
17  
18  
19  
20  
21  
22  
23  
24  
25  
26  
27  
28  
29  
30  
31  
32  
33  
34  
35  
36  
37  
38  
39  
40  
41  
42  
43  
44  
45  
46  
47  
48  
49  
50  
51  
52  
53  
54  
55  
56  
57  
58  
59  
60

For peer review only

## LEGENDS OF THE FIGURES

Fig. 1 Medicine use process for patients with chronic illnesses as illustrated in the National Medicines Information Strategy (© Fimea 2012).<sup>23</sup>

Fig. 2 Content analysis process applying the Framework Method.<sup>35</sup>

Fig. 3 Stakeholders' views on well-implemented actions in medication use process for patients with chronic illnesses. Categories derived deductively are marked as blue (n=7) and categories emerged inductively from the stakeholders' interviews are marked as green (n=3). (n=a summative of number of the single interviewee's mentions, HCP=healthcare professional)

Fig. 4 Stakeholders' views on actions needing development in medication use process for patients with chronic illnesses. Categories derived deductively are marked as blue (n=7) and categories emerged inductively from the stakeholders' interviews are marked as green (n=3). (n=a summative of number of the single interviewee's mentions, HCP=healthcare professional)



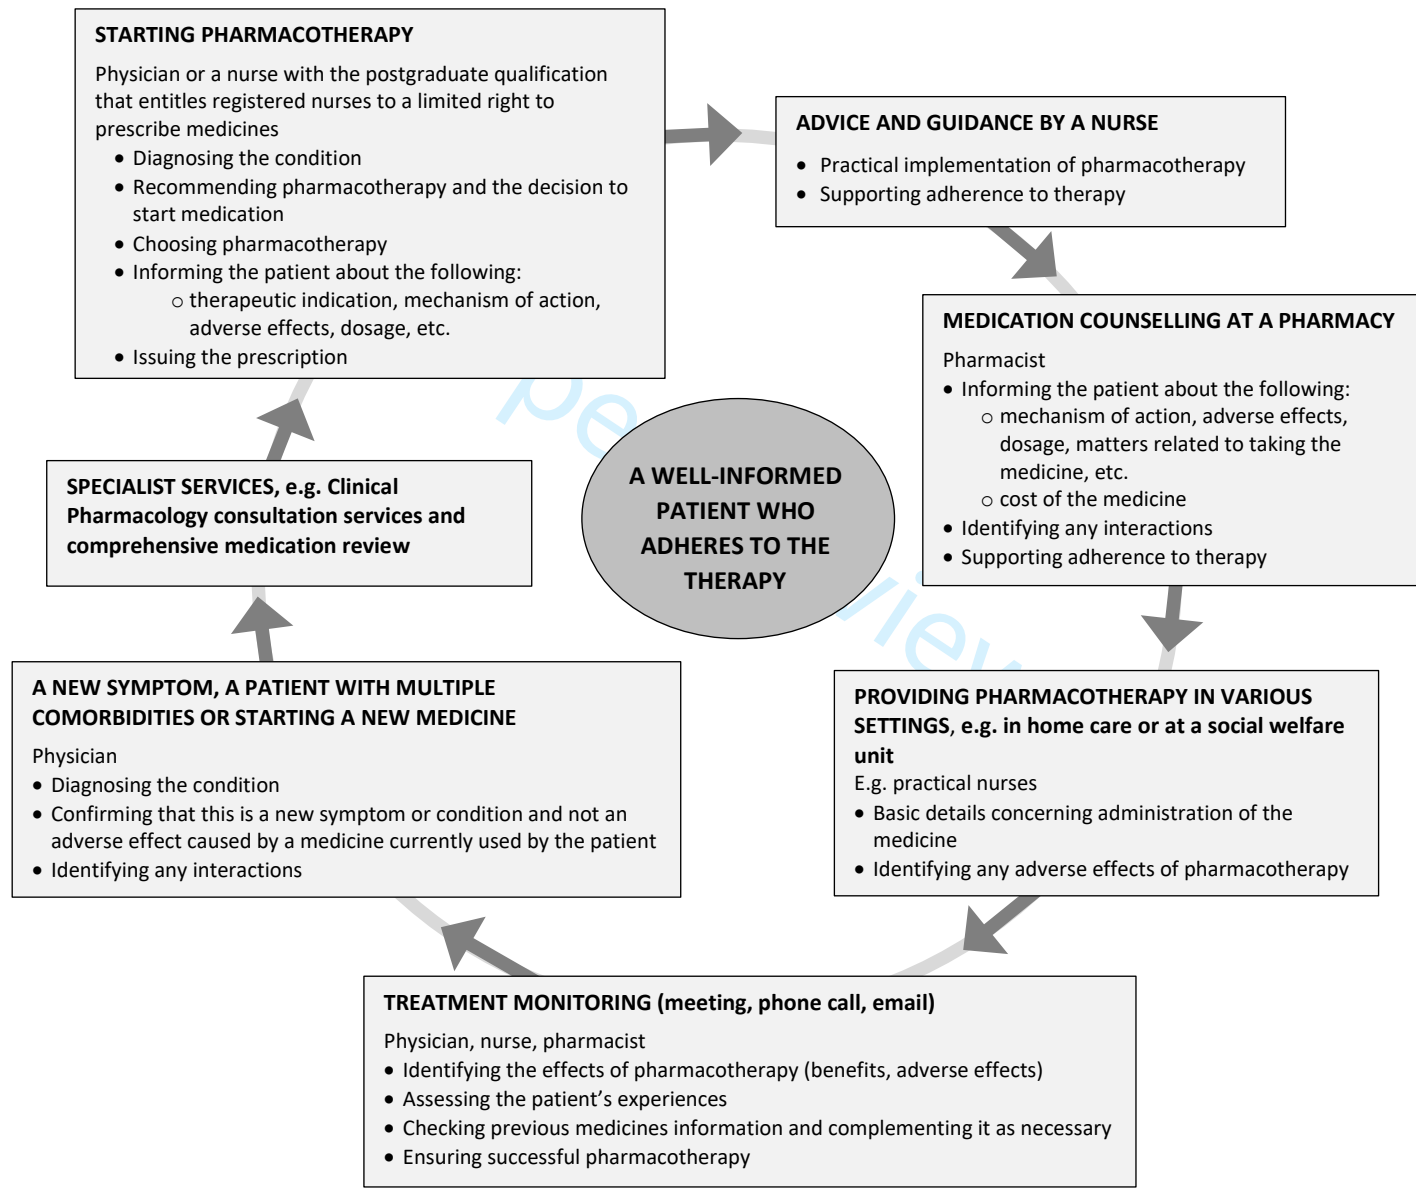

Figure 1

1  
2  
3  
4  
5  
6  
7  
8  
9  
10  
11  
12  
13  
14  
15  
16  
17  
18  
19  
20  
21  
22  
23  
24  
25  
26  
27  
28  
29  
30  
31  
32  
33  
34  
35  
36  
37  
38  
39  
40  
41  
42  
43  
44  
45  
46

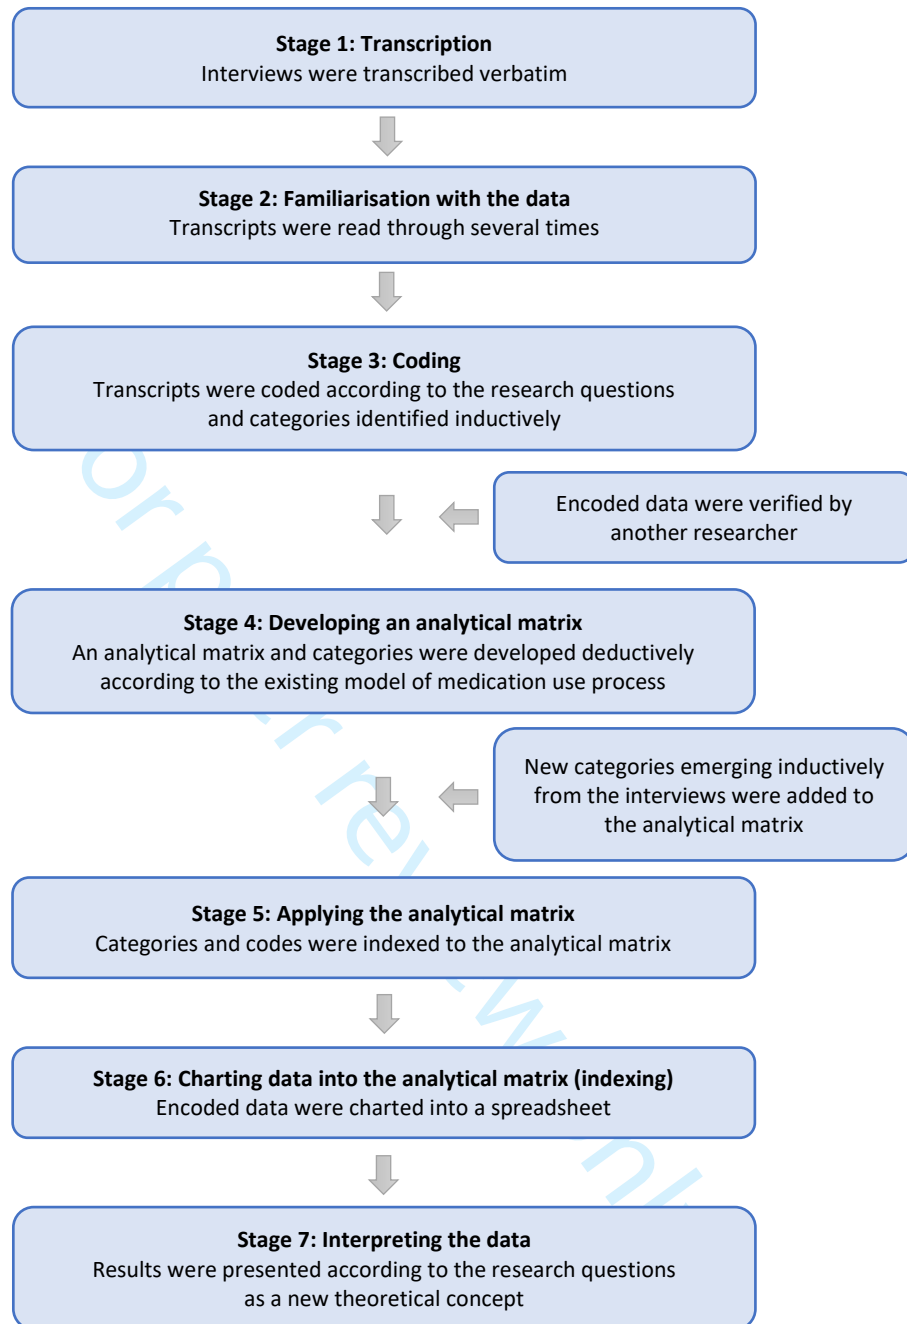**Figure 2**

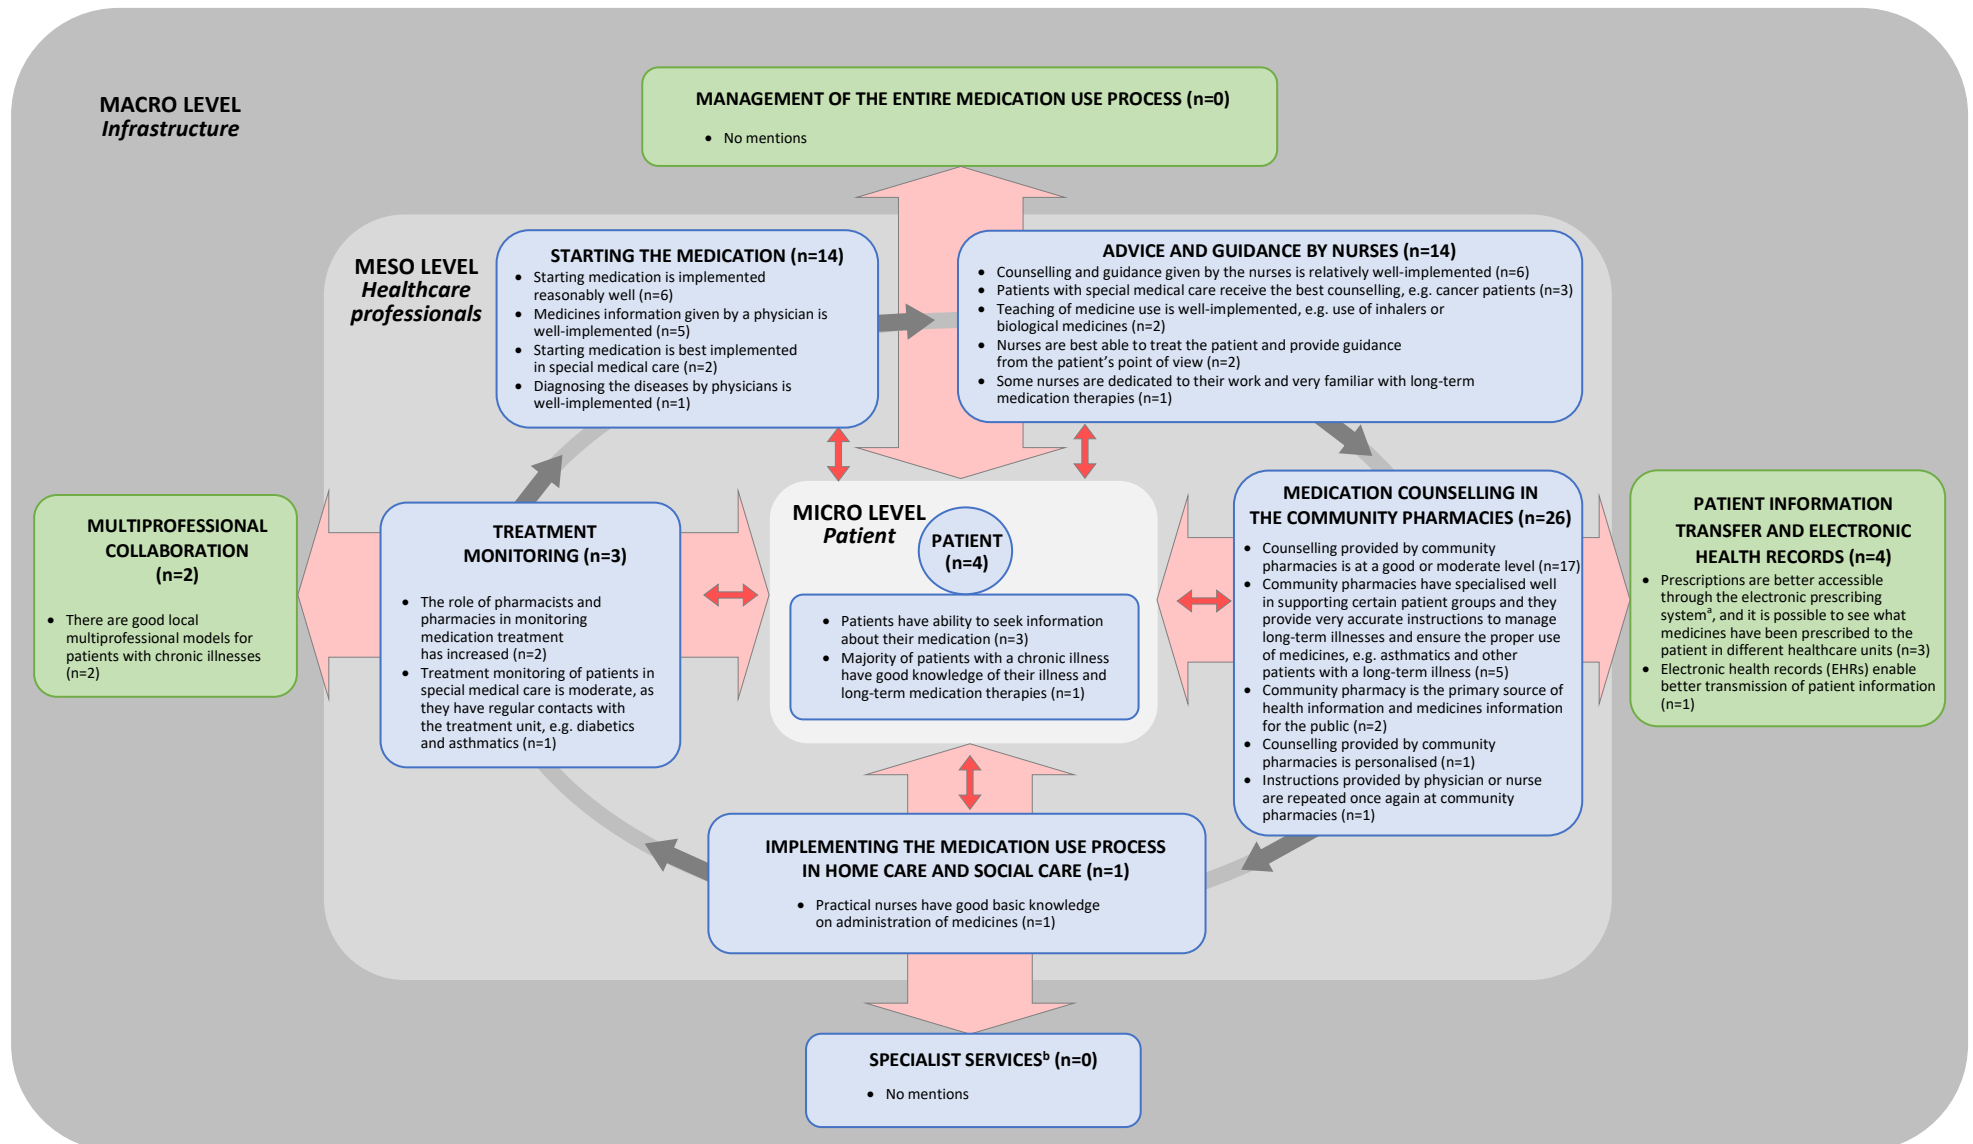

<sup>a</sup>All prescriptions must be electronically prescribed from 1 January 2017, <sup>b</sup>e.g. clinical pharmacology consultation services and comprehensive medication reviews.

Figure 3

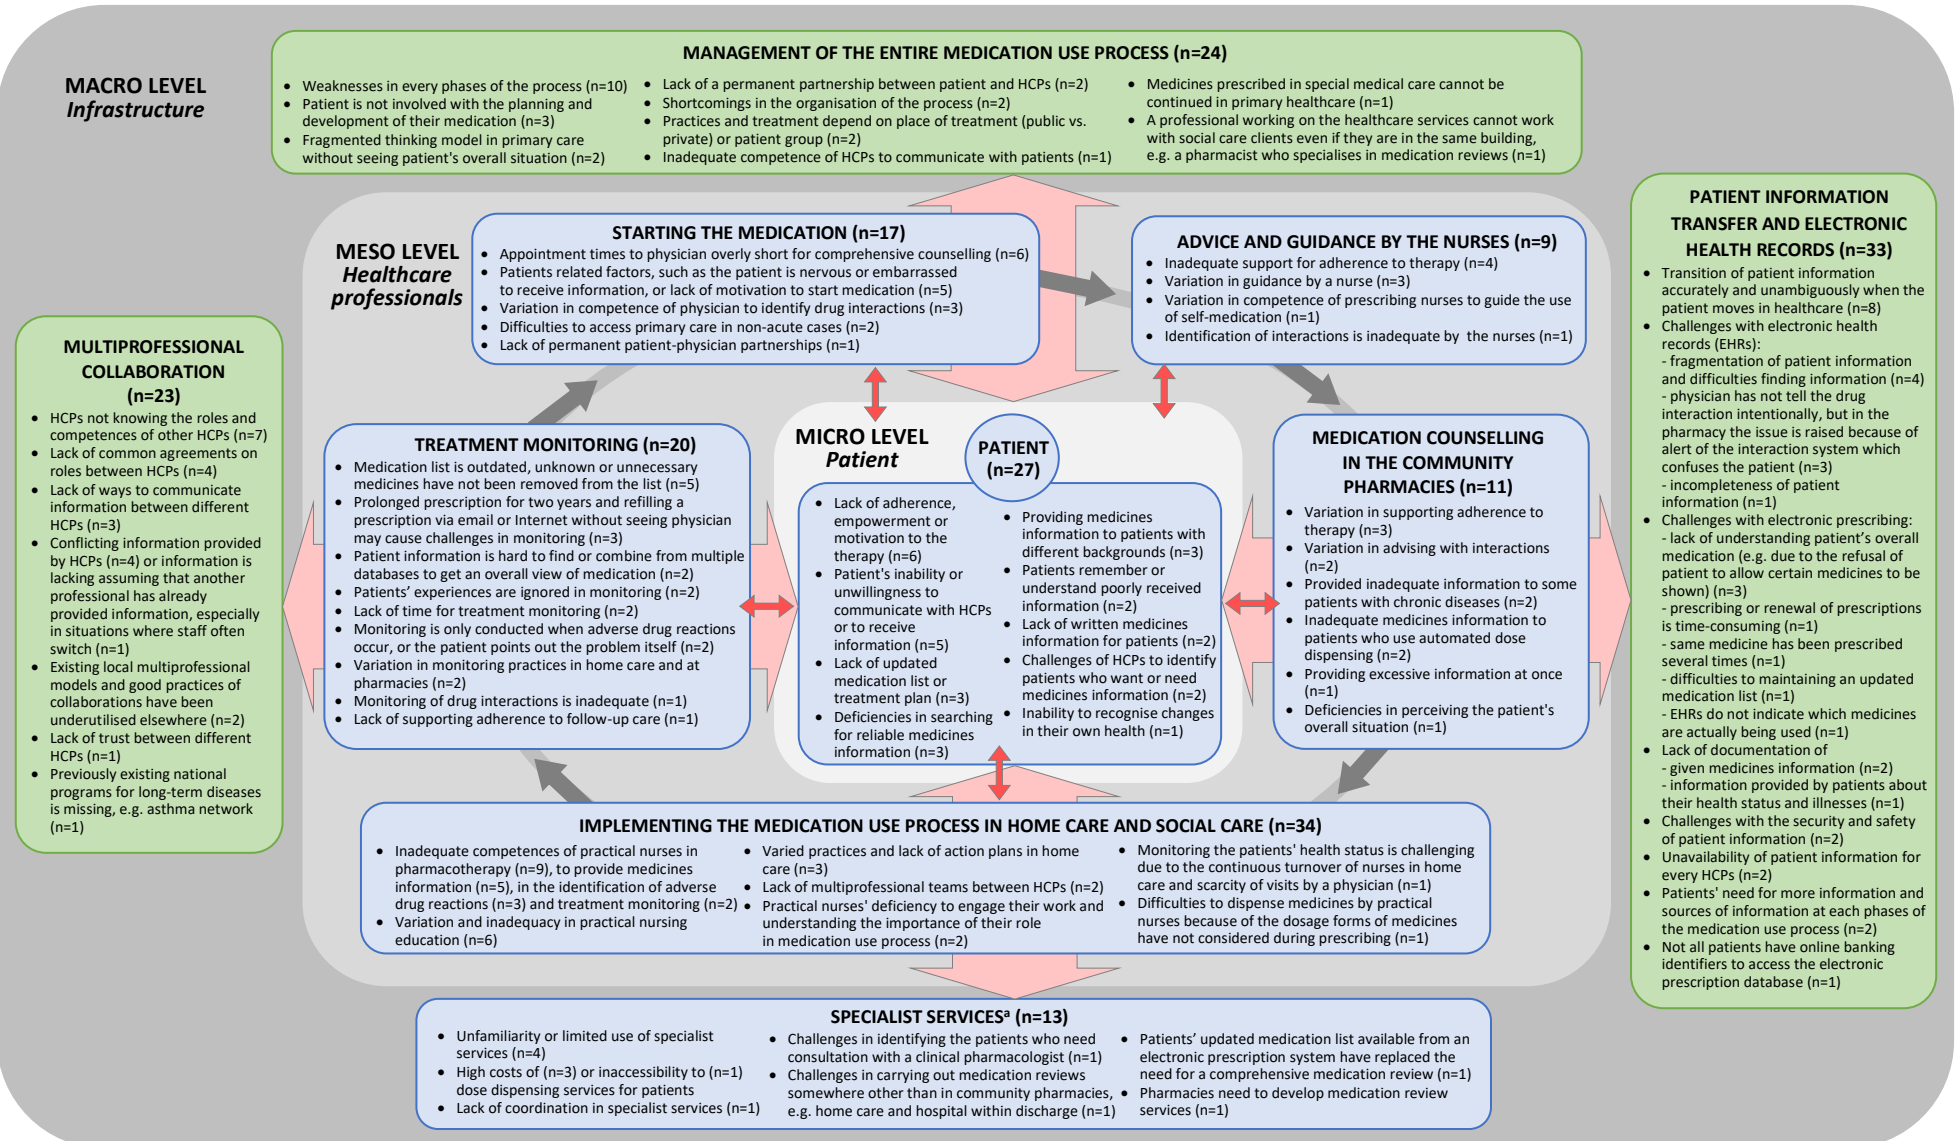

<sup>a</sup>e.g. clinical pharmacology consultation services and comprehensive medication reviews.

Figure 4

**Appendix A.** Illustrative examples of the expressions (translated from Finnish) mentioned by the interviewees on the well-implemented actions and actions needing development in the medication use process categorised by main categories (n=10) emerged from the interviews. (P=participant of the study)

| MAIN CATEGORIES                                            | WELL-IMPLEMENTED ACTIONS                                                                                                                                                                                                                                                                                                                                                                 | ACTIONS NEEDING DEVELOPMENT                                                                                                                                                                                                                                                                                                                                                                                                                                                                                                                                                                                                                                                                                                                                        |
|------------------------------------------------------------|------------------------------------------------------------------------------------------------------------------------------------------------------------------------------------------------------------------------------------------------------------------------------------------------------------------------------------------------------------------------------------------|--------------------------------------------------------------------------------------------------------------------------------------------------------------------------------------------------------------------------------------------------------------------------------------------------------------------------------------------------------------------------------------------------------------------------------------------------------------------------------------------------------------------------------------------------------------------------------------------------------------------------------------------------------------------------------------------------------------------------------------------------------------------|
| <b>Infrastructure level (macro)</b>                        |                                                                                                                                                                                                                                                                                                                                                                                          |                                                                                                                                                                                                                                                                                                                                                                                                                                                                                                                                                                                                                                                                                                                                                                    |
| Management of the entire medication use process            | No mentions.                                                                                                                                                                                                                                                                                                                                                                             | <p>“Well, it’s not an individual employee, but the entire medication use process should be better organised...”<br/>[representative from the hospital, P72]</p> <p>“And it also happens in primary healthcare, that they do identify a single illness or health problem but do not take account the person as a whole. This represents a fragmented way of thinking.”<br/>[representative from the university, P42]</p>                                                                                                                                                                                                                                                                                                                                            |
| Patient information transfer and electronic health records | <p>“Electronic prescriptions have provided more clarity [to the medication use process ]... via electronic prescription, with both nurses and physician providing patient care, for example for elderly people have a more comprehensive and updated view on patients’ medication than previously. It has been a great improvement...”<br/>[representative from the university, P40]</p> | <p>“Numerous investigations have identified problems, such as lack of critical patient information or incorrect information transfer, in the medication use process. It’s scary. In a way, it pulls the plug out of many things.”<br/>[representative from the scientific society, P66]</p> <p>“Well, I think we should pay attention to how medications are recorded in the electronic health records and how information is safely visible there. That’s catastrophic, that the same medicine may be listed there many times. But instead there is no information on when medication has been started or discontinued. [Medication] lists don’t update themselves, but someone needs to reconcile them.”<br/>[representative from the healthcare center, P9]</p> |
| Multiprofessional collaboration                            | <p>“Excellent local multiprofessional models for cooperation, particularly in long-term patient care, already exist.”<br/>[representative from the national authority, P6]</p>                                                                                                                                                                                                           | <p>“Healthcare professionals should know better the tasks and responsibilities of each other, and, on the other hand, should also be familiar with each other’s knowledge, and what they can and cannot do.”<br/>[representative from the university, P40]</p> <p>“Do we know the skills of different health professionals [participating in the medication use process] well enough and how we could make optimal use of them. On the other hand, can we fully trust other professions.”<br/>[representative from the professional organisation, P18]</p>                                                                                                                                                                                                         |
| Specialist services                                        | No mentions.                                                                                                                                                                                                                                                                                                                                                                             | <p>“Comprehensive medication reviews... big efforts should be made to make the reviews available to patients in need, so that they don’t have to pay for them themselves. This referral policy or some other way, such as the implementation of medication reviews at the pharmacies, is still unrealised.”<br/>[representative from the professional organisation, P23]</p>                                                                                                                                                                                                                                                                                                                                                                                       |

| Healthcare professionals level ( <i>meso</i> )     |                                                                                                                                                                                                                                                                                                                                                                                                                                                                                                                                               |                                                                                                                                                                                                                                                                                                                                                                                                                                                                                                                                                                                                                                                                                                                                                      |
|----------------------------------------------------|-----------------------------------------------------------------------------------------------------------------------------------------------------------------------------------------------------------------------------------------------------------------------------------------------------------------------------------------------------------------------------------------------------------------------------------------------------------------------------------------------------------------------------------------------|------------------------------------------------------------------------------------------------------------------------------------------------------------------------------------------------------------------------------------------------------------------------------------------------------------------------------------------------------------------------------------------------------------------------------------------------------------------------------------------------------------------------------------------------------------------------------------------------------------------------------------------------------------------------------------------------------------------------------------------------------|
| Starting the medication                            | <p>“Starting the medication works rather well at the moment. It is always a physician who diagnoses a disease and counsels the patient how to manage their disease and treatment. Additionally, there is also a nurse commonly involved in counselling. Especially from the perspective of special care, this stage of the medication use process seems to work.”<br/>[representative from the hospital districts, P73]</p> <p>“Starting the medication, I think it works relatively well.”<br/>[representative from the university, P69]</p> | <p>“As a physician, I commonly prescribe medicines. While prescribing, there is often limited time for medication counselling. You just really manage to say that “here is your prescription and inform how patient should take her/his medication.”<br/>[representative from the patient organisation, P71]</p> <p>“Usually, patients are not very responsive to counselling, they may not remember what they have been told during the physician’s visit.<br/>[representative from the professional organisation, P51]</p>                                                                                                                                                                                                                         |
| Advice and guidance by nurses                      | <p>“I do have the belief that while the nurses and midwives have limited prescribing rights, they also have a good knowledge on what to tell patients about medicines.”<br/>[representative from the patient organisation, P56]</p> <p>“And of course, In special medical care, patients will receive the best counselling on their medicines. This concerns for example cancer patients.”<br/>[representative from community pharmacy, P64]</p>                                                                                              | <p>“Advice and guidance given by a nurse varies greatly depending on the resources and indications.”<br/>[representative from the patient organisation, P71]</p> <p>“Nurses should support their patients’ adherence.”<br/>[representative from the professional organisation, P26]</p> <p>“Nurses may not counsel patients much about drug-drug interactions, although it would be really crucial for all patients.”<br/>[representative from the polytechnic, P74]</p>                                                                                                                                                                                                                                                                             |
| Medication counselling in the community pharmacies | <p>“The best knowledge about medicines is really in the community pharmacies.”<br/>[representative from the professional organisation, P50]</p> <p>“The process is best implemented in community pharmacies. There has been a systematic attempt to develop medication counselling for patients with certain diseases, such as asthma and other chronic diseases.”<br/>[representative from the scientific society, P59]</p>                                                                                                                  | <p>“Pharmacists should not give as much information about medicines as they currently do. It is probably because they wish to play safe and explain all the possible adverse drug reactions and all other things. It may result in decreased adherence.”<br/>[representative from the university, P78]</p> <p>“Supporting medication adherence, I do not know, maybe it is supported in some way, but I also think there occurs [among healthcare professionals] some paternalistic ways of thinking. They may consider that there is no need to tell everything. If the physician prescribes and counsels something, the patient should just take his or her medication and follow instructions.”<br/>[representative from the university, P28]</p> |

|                                                                |                                                                      |                                                                                                                                                                                                                                                                                |                                                                                                                                                                                                                                                                                                                                                                                                                                                                                                                                                                                                                                                                                                                                                                                                                 |
|----------------------------------------------------------------|----------------------------------------------------------------------|--------------------------------------------------------------------------------------------------------------------------------------------------------------------------------------------------------------------------------------------------------------------------------|-----------------------------------------------------------------------------------------------------------------------------------------------------------------------------------------------------------------------------------------------------------------------------------------------------------------------------------------------------------------------------------------------------------------------------------------------------------------------------------------------------------------------------------------------------------------------------------------------------------------------------------------------------------------------------------------------------------------------------------------------------------------------------------------------------------------|
| 1<br>2<br>3<br>4<br>5<br>6<br>7<br>8<br>9<br>10<br>11          | Implementing the medication use process in home care and social care | "I would believe and really hope that practical nurses have a good basic knowledge on the administration of medicines."<br><i>[representative from the university, P76]</i>                                                                                                    | "There is quite a lot of variation in nursing education as I understand it, because the aims of the education are formulated relatively loosely, and it depends on the local possibilities."<br><i>[representative from the university, P40]</i><br><br>"This medication use process is as strong as its weakest and less educated link, which commonly is a practical nurse or assistant or even an entirely untrained person who medicates patients. It is not certain if they have updated information and knowledge. Either they may not have for example ability to identify adverse drug reactions."<br><i>[representative from the patient association, P49]</i>                                                                                                                                         |
| 12<br>13<br>14<br>15<br>16<br>17<br>18<br>19<br>20<br>21<br>22 | Treatment monitoring                                                 | "Treatments are well-monitored in relation to chronic medications and chronic illnesses, such as diabetes. Then there is a regular contact with particular physician."<br><i>[representative from the university, P42]</i>                                                     | It is really a challenge at the moment that the medication lists are not updated... And I think it is especially difficult when patient has multiple medications in use...When you have a lot of medicines which have all been prescribed in different places and by different physician, it seems that there is sometimes no one with the overall idea of the drug load.<br><i>[representative from the pharmacy, P21]</i><br><br>"Treatment monitoring, and especially the identification of potential adverse drug reactions, is perhaps the most challenging part in the medication use process. People do not know when to contact healthcare. It is also unclear how well they [ADR's] are recognised in healthcare. That's the challenge."<br><i>[representative from the patient organisation, P71]</i> |
| 23                                                             | <b>Patient level (micro)</b>                                         |                                                                                                                                                                                                                                                                                |                                                                                                                                                                                                                                                                                                                                                                                                                                                                                                                                                                                                                                                                                                                                                                                                                 |
| 24<br>25<br>26<br>27<br>28<br>29<br>30<br>31<br>32<br>33<br>34 | Patient                                                              | "Patients with chronic illnesses know a lot about their condition and medications. They also seek information. I'm not worried about the information sources that they use. Certainly, most of them use reliable sources."<br><i>[representative from the university, P78]</i> | "Patients do not even want to know [about the medicines they use]. This is something that healthcare professionals should recognise. They do not really remember all things that they have been told, and there is not even enough time for medication counselling during the visit with physician. In particular, when they receive a new diagnosis, they can concentrate only on that, and it is fair enough if they remember to take their pill every day, that's enough."<br><i>[representative from the scientific society, P29]</i><br><br>"It is really difficult to ask questions [from the physician] as patients may not know what to ask. And on the other hand, patients may be afraid that they will ask naive questions..."<br><i>[representative from the university, P76]</i>                   |

# Reporting checklist for qualitative study.

Based on the SRQR guidelines.

## Instructions to authors

Complete this checklist by entering the page numbers from your manuscript where readers will find each of the items listed below.

Your article may not currently address all the items on the checklist. Please modify your text to include the missing information. If you are certain that an item does not apply, please write "n/a" and provide a short explanation.

Upload your completed checklist as an extra file when you submit to a journal.

In your methods section, say that you used the SRQR reporting guidelines, and cite them as:

O'Brien BC, Harris IB, Beckman TJ, Reed DA, Cook DA. Standards for reporting qualitative research: a synthesis of recommendations. Acad Med. 2014;89(9):1245-1251.

|              | Reporting Item                                                                                                                                                                                                                                          | Page Number |
|--------------|---------------------------------------------------------------------------------------------------------------------------------------------------------------------------------------------------------------------------------------------------------|-------------|
| <b>Title</b> |                                                                                                                                                                                                                                                         |             |
|              | <a href="#">#1</a> Concise description of the nature and topic of the study identifying the study as qualitative or indicating the approach (e.g. ethnography, grounded theory) or data collection methods (e.g. interview, focus group) is recommended | 1           |



## Abstract

[#2](#) Summary of the key elements of the study using the abstract format of the intended publication; typically includes background, purpose, methods, results and conclusions

## Introduction

[#3](#) Description and significance of the problem / phenomenon studied: review of relevant theory and empirical work; problem statement

[#4](#) Purpose of the study and specific objectives or question

## Methods

[#5](#) Qualitative approach and research paradigm

Qualitative approach (e.g. ethnography, grounded theory, case study, phenomenology, narrative research) and guiding theory if appropriate; identifying the research paradigm (e.g. postpositivist, constructivist / interpretivist) is also recommended; rationale. The rationale should briefly discuss the justification for choosing that theory, approach, method or technique rather than other options available; the assumptions and limitations implicit in those choices and how those choices influence study conclusions and transferability. As appropriate the

|    |                           |                                                                             |          |
|----|---------------------------|-----------------------------------------------------------------------------|----------|
| 1  |                           | rationale for several items might be discussed                              |          |
| 2  |                           |                                                                             |          |
| 3  |                           | together.                                                                   |          |
| 4  |                           |                                                                             |          |
| 5  |                           |                                                                             |          |
| 6  | Researcher                | <a href="#">#6</a> Researchers' characteristics that may influence the      | 7        |
| 7  |                           |                                                                             |          |
| 8  | characteristics and       | research, including personal attributes, qualifications /                   |          |
| 9  |                           |                                                                             |          |
| 10 | reflexivity               | experience, relationship with participants,                                 |          |
| 11 |                           |                                                                             |          |
| 12 |                           | assumptions and / or presuppositions; potential or                          |          |
| 13 |                           |                                                                             |          |
| 14 |                           | actual interaction between researchers' characteristics                     |          |
| 15 |                           |                                                                             |          |
| 16 |                           | and the research questions, approach, methods,                              |          |
| 17 |                           |                                                                             |          |
| 18 |                           | results and / or transferability                                            |          |
| 19 |                           |                                                                             |          |
| 20 |                           |                                                                             |          |
| 21 |                           |                                                                             |          |
| 22 | Context                   | <a href="#">#7</a> Setting / site and salient contextual factors; rationale | 5,6      |
| 23 |                           |                                                                             |          |
| 24 |                           |                                                                             |          |
| 25 | Sampling strategy         | <a href="#">#8</a> How and why research participants, documents, or         | 5,6      |
| 26 |                           |                                                                             |          |
| 27 |                           | events were selected; criteria for deciding when no                         |          |
| 28 |                           |                                                                             |          |
| 29 |                           | further sampling was necessary (e.g. sampling                               |          |
| 30 |                           |                                                                             |          |
| 31 |                           | saturation); rationale                                                      |          |
| 32 |                           |                                                                             |          |
| 33 |                           |                                                                             |          |
| 34 |                           |                                                                             |          |
| 35 | Ethical issues pertaining | <a href="#">#9</a> Documentation of approval by an appropriate ethics       | 8        |
| 36 |                           |                                                                             |          |
| 37 | to human subjects         | review board and participant consent, or explanation                        |          |
| 38 |                           |                                                                             |          |
| 39 |                           | for lack thereof; other confidentiality and data security                   |          |
| 40 |                           |                                                                             |          |
| 41 |                           | issues                                                                      |          |
| 42 |                           |                                                                             |          |
| 43 |                           |                                                                             |          |
| 44 |                           |                                                                             |          |
| 45 | Data collection methods   | <a href="#">#10</a> Types of data collected; details of data collection     | 7, Fig.2 |
| 46 |                           |                                                                             |          |
| 47 |                           | procedures including (as appropriate) start and stop                        |          |
| 48 |                           |                                                                             |          |
| 49 |                           | dates of data collection and analysis, iterative                            |          |
| 50 |                           |                                                                             |          |
| 51 |                           | process, triangulation of sources / methods, and                            |          |
| 52 |                           |                                                                             |          |
| 53 |                           | modification of procedures in response to evolving                          |          |
| 54 |                           |                                                                             |          |
| 55 |                           | study findings; rationale                                                   |          |
| 56 |                           |                                                                             |          |
| 57 |                           |                                                                             |          |
| 58 |                           |                                                                             |          |
| 59 |                           |                                                                             |          |
| 60 |                           |                                                                             |          |

|    |                         |                     |                                                          |          |
|----|-------------------------|---------------------|----------------------------------------------------------|----------|
| 1  | Data collection         | <a href="#">#11</a> | Description of instruments (e.g. interview guides,       | 6,7      |
| 2  |                         |                     | questionnaires) and devices (e.g. audio recorders)       |          |
| 3  | instruments and         |                     | used for data collection; if / how the instruments(s)    |          |
| 4  |                         |                     | changed over the course of the study                     |          |
| 5  | technologies            |                     |                                                          |          |
| 6  |                         |                     |                                                          |          |
| 7  |                         |                     |                                                          |          |
| 8  |                         |                     |                                                          |          |
| 9  |                         |                     |                                                          |          |
| 10 |                         |                     |                                                          |          |
| 11 | Units of study          | <a href="#">#12</a> | Number and relevant characteristics of participants,     | 8,       |
| 12 |                         |                     | documents, or events included in the study; level of     |          |
| 13 |                         |                     | participation (could be reported in results)             | Table 1  |
| 14 |                         |                     |                                                          |          |
| 15 |                         |                     |                                                          |          |
| 16 |                         |                     |                                                          |          |
| 17 |                         |                     |                                                          |          |
| 18 |                         |                     |                                                          |          |
| 19 | Data processing         | <a href="#">#13</a> | Methods for processing data prior to and during          | 7, Fig.2 |
| 20 |                         |                     | analysis, including transcription, data entry, data      |          |
| 21 |                         |                     | management and security, verification of data            |          |
| 22 |                         |                     | integrity, data coding, and 4nonymization /              |          |
| 23 |                         |                     | deidentification of excerpts                             |          |
| 24 |                         |                     |                                                          |          |
| 25 |                         |                     |                                                          |          |
| 26 |                         |                     |                                                          |          |
| 27 |                         |                     |                                                          |          |
| 28 |                         |                     |                                                          |          |
| 29 |                         |                     |                                                          |          |
| 30 |                         |                     |                                                          |          |
| 31 | Data analysis           | <a href="#">#14</a> | Process by which inferences, themes, etc. were           | 7, Fig.2 |
| 32 |                         |                     | identified and developed, including the researchers      |          |
| 33 |                         |                     | involved in data analysis; usually references a specific |          |
| 34 |                         |                     | paradigm or approach; rationale                          |          |
| 35 |                         |                     |                                                          |          |
| 36 |                         |                     |                                                          |          |
| 37 |                         |                     |                                                          |          |
| 38 |                         |                     |                                                          |          |
| 39 |                         |                     |                                                          |          |
| 40 |                         |                     |                                                          |          |
| 41 | Techniques to enhance   | <a href="#">#15</a> | Techniques to enhance trustworthiness and credibility    | 7        |
| 42 |                         |                     | of data analysis (e.g. member checking, audit trail,     |          |
| 43 | trustworthiness         |                     | triangulation); rationale                                |          |
| 44 |                         |                     |                                                          |          |
| 45 |                         |                     |                                                          |          |
| 46 |                         |                     |                                                          |          |
| 47 |                         |                     |                                                          |          |
| 48 | <b>Results/findings</b> |                     |                                                          |          |
| 49 |                         |                     |                                                          |          |
| 50 |                         |                     |                                                          |          |
| 51 | Syntheses and           | <a href="#">#16</a> | Main findings (e.g. interpretations, inferences, and     | 8-11     |
| 52 |                         |                     | themes); might include development of a theory or        |          |
| 53 | interpretation          |                     | model, or integration with prior research or theory      |          |
| 54 |                         |                     |                                                          |          |
| 55 |                         |                     |                                                          |          |
| 56 |                         |                     |                                                          |          |
| 57 |                         |                     |                                                          |          |
| 58 |                         |                     |                                                          |          |
| 59 |                         |                     |                                                          |          |
| 60 |                         |                     |                                                          |          |

|    |                         |                     |                                                          |          |
|----|-------------------------|---------------------|----------------------------------------------------------|----------|
| 1  | Links to empirical data | <a href="#">#17</a> | Evidence (e.g. quotes, field notes, text excerpts,       | Appendix |
| 2  |                         |                     | photographs) to substantiate analytic findings           | A        |
| 3  |                         |                     |                                                          |          |
| 4  |                         |                     |                                                          |          |
| 5  |                         |                     |                                                          |          |
| 6  | <b>Discussion</b>       |                     |                                                          |          |
| 7  |                         |                     |                                                          |          |
| 8  |                         |                     |                                                          |          |
| 9  |                         |                     |                                                          |          |
| 10 | Intergration with prior | <a href="#">#18</a> | Short summary of main findings; explanation of how       | 11-13    |
| 11 | work, implications,     |                     | findings and conclusions connect to, support,            |          |
| 12 |                         |                     | elaborate on, or challenge conclusions of earlier        |          |
| 13 | transferability and     |                     | scholarship; discussion of scope of application /        |          |
| 14 | contribution(s) to the  |                     | generalizability; identification of unique               |          |
| 15 | field                   |                     | contributions(s) to scholarship in a discipline or field |          |
| 16 |                         |                     |                                                          |          |
| 17 |                         |                     |                                                          |          |
| 18 |                         |                     |                                                          |          |
| 19 |                         |                     |                                                          |          |
| 20 |                         |                     |                                                          |          |
| 21 |                         |                     |                                                          |          |
| 22 |                         |                     |                                                          |          |
| 23 |                         |                     |                                                          |          |
| 24 | Limitations             | <a href="#">#19</a> | Trustworthiness and limitations of findings              | 13,14    |
| 25 |                         |                     |                                                          |          |
| 26 |                         |                     |                                                          |          |
| 27 | <b>Other</b>            |                     |                                                          |          |
| 28 |                         |                     |                                                          |          |
| 29 |                         |                     |                                                          |          |
| 30 | Conflicts of interest   | <a href="#">#20</a> | Potential sources of influence of perceived influence    | 15       |
| 31 |                         |                     | on study conduct and conclusions; how these were         |          |
| 32 |                         |                     | managed                                                  |          |
| 33 |                         |                     |                                                          |          |
| 34 |                         |                     |                                                          |          |
| 35 |                         |                     |                                                          |          |
| 36 |                         |                     |                                                          |          |
| 37 |                         |                     |                                                          |          |
| 38 | Funding                 | <a href="#">#21</a> | Sources of funding and other support; role of funders    | 15       |
| 39 |                         |                     | in data collection, interpretation and reporting         |          |
| 40 |                         |                     |                                                          |          |
| 41 |                         |                     |                                                          |          |
| 42 |                         |                     |                                                          |          |

None The SRQR checklist is distributed with permission of Wolters Kluwer © 2014 by the Association of American Medical Colleges. This checklist can be completed online using <https://www.goodreports.org/>, a tool made by the [EQUATOR Network](#) in collaboration with [Penelope.ai](#)

# BMJ Open

## How far are we from a medication use process aiming at well-informed adherent patients with long-term medications? A qualitative study

|                                 |                                                                                                                                                                                                                                                                                                         |
|---------------------------------|---------------------------------------------------------------------------------------------------------------------------------------------------------------------------------------------------------------------------------------------------------------------------------------------------------|
| Journal:                        | <i>BMJ Open</i>                                                                                                                                                                                                                                                                                         |
| Manuscript ID                   | bmjopen-2019-036526.R1                                                                                                                                                                                                                                                                                  |
| Article Type:                   | Original research                                                                                                                                                                                                                                                                                       |
| Date Submitted by the Author:   | 10-Mar-2020                                                                                                                                                                                                                                                                                             |
| Complete List of Authors:       | Mononen, Niina; University of Helsinki, Faculty of Pharmacy, Division of Pharmacology and Pharmacotherapy<br>Pohjanoksa-Mäntylä, Marika ; University of Helsinki<br>Airaksinen, Marja; University of Helsinki<br>Hämeen-Anttila, Katri; Finnish Medicines Agency FIMEA, Assessment of Pharmacotherapies |
| <b>Primary Subject Heading</b>: | Health policy                                                                                                                                                                                                                                                                                           |
| Secondary Subject Heading:      | Health informatics, Qualitative research                                                                                                                                                                                                                                                                |
| Keywords:                       | Health policy < HEALTH SERVICES ADMINISTRATION & MANAGEMENT, Organisation of health services < HEALTH SERVICES ADMINISTRATION & MANAGEMENT, PUBLIC HEALTH, QUALITATIVE RESEARCH, HEALTH SERVICES ADMINISTRATION & MANAGEMENT                                                                            |
|                                 |                                                                                                                                                                                                                                                                                                         |

SCHOLARONE™  
Manuscripts



I, the Submitting Author has the right to grant and does grant on behalf of all authors of the Work (as defined in the below author licence), an exclusive licence and/or a non-exclusive licence for contributions from authors who are: i) UK Crown employees; ii) where BMJ has agreed a CC-BY licence shall apply, and/or iii) in accordance with the terms applicable for US Federal Government officers or employees acting as part of their official duties; on a worldwide, perpetual, irrevocable, royalty-free basis to BMJ Publishing Group Ltd ("BMJ") its licensees and where the relevant Journal is co-owned by BMJ to the co-owners of the Journal, to publish the Work in this journal and any other BMJ products and to exploit all rights, as set out in our [licence](#).

The Submitting Author accepts and understands that any supply made under these terms is made by BMJ to the Submitting Author unless you are acting as an employee on behalf of your employer or a postgraduate student of an affiliated institution which is paying any applicable article publishing charge ("APC") for Open Access articles. Where the Submitting Author wishes to make the Work available on an Open Access basis (and intends to pay the relevant APC), the terms of reuse of such Open Access shall be governed by a Creative Commons licence – details of these licences and which [Creative Commons](#) licence will apply to this Work are set out in our licence referred to above.

Other than as permitted in any relevant BMJ Author's Self Archiving Policies, I confirm this Work has not been accepted for publication elsewhere, is not being considered for publication elsewhere and does not duplicate material already published. I confirm all authors consent to publication of this Work and authorise the granting of this licence.

|                                             |                                                                                                                                                                                                                                                                                                                                                                                                                                                                                           |
|---------------------------------------------|-------------------------------------------------------------------------------------------------------------------------------------------------------------------------------------------------------------------------------------------------------------------------------------------------------------------------------------------------------------------------------------------------------------------------------------------------------------------------------------------|
| <b>Title</b>                                | <b>How far are we from a medication use process aiming at well-informed adherent patients with long-term medications? A qualitative study</b>                                                                                                                                                                                                                                                                                                                                             |
| <b>Authors' names</b>                       | Niina Mononen, Marika Pohjanoksa-Mäntylä, Marja Airaksinen, Katri Hämeen-Anttila                                                                                                                                                                                                                                                                                                                                                                                                          |
| <b>Address and position for each author</b> | <p>Niina Mononen, MSc (Pharm), PhD Student<br/> Marika Pohjanoksa-Mäntylä, PhD, University Lecturer<br/> Marja Airaksinen, Professor, PhD</p> <p>Clinical Pharmacy Group, Division of Pharmacology and Pharmacotherapy, Faculty of Pharmacy, University of Helsinki, 00014 University of Helsinki, Finland</p> <p>Katri Hämeen-Anttila, PhD, Research and Development Manager<br/> Assessment of Pharmacotherapies, Finnish Medicines Agency Fimea, P.O. Box 55, 00034 FIMEA, Finland</p> |
| <b>Corresponding author</b>                 | <p>Niina Mononen<br/> Clinical Pharmacy Group, Division of Pharmacology and Pharmacotherapy, Faculty of Pharmacy, University of Helsinki, 00014 University of Helsinki, Finland<br/> E-mail: niina.mononen@helsinki.fi<br/> Telephone: +358 (0) 2941 59917</p>                                                                                                                                                                                                                            |

**Word count:** 4045

**Keywords:** health policy, health services administration & management, organisation of health services, public health, qualitative research

## ABSTRACT

### Objective

Finland is one of the few countries that has established a national medicines information (MI) strategy. The ultimate goal of the Strategy is a well-implemented medication use process resulting in well-informed adherent patients. This study aimed at evaluating the implementation of the Strategy three years after its launch.

### Design

The evaluation applied pragmatic approach and was conducted by interviewing stakeholders involved in The National Medicines Information Network enhancing the Strategy's implementation. The Network comprises national key stakeholders producing and using MI. Data were deductively and inductively content analysed by applying the Framework Method.

### Setting

National implementation of the Strategy throughout the healthcare after the first operational period (2012–2014) in 2015.

### Participants

Members of The National Medicines Information Network (n=79/111, participation rate 71%, representing 42/53 stakeholder organisations).

### Outcome measures

A new conceptual framework was developed based on stakeholders' views on well-implemented actions and actions needing development in the medication use process at: 1) infrastructure (*macro*), 2) healthcare professionals (*meso*), and 3) patient (*micro*) level.

### Results

Medication counselling by community pharmacists was the most effectively implemented part of the medication use process, followed by physician's actions while starting a new medication, and advice given by nurses. The major development needs concerned: 1) poor access to patient information and its transfer in healthcare, particularly the lack of reconciled medication lists and electronic health records (*macro*); 2) poor functioning medication use process in home care and social care units, such as nursing homes (*meso*); and 3) limited patient involvement in their care (*micro*).

### Conclusions

Far more actions for development than well-established practices in the medication use process were identified. Considerable improvements were reported to be needed at the infrastructure level to support the rational use of medicines at the patient level when implementing the next steps of the National Medicines Information Strategy.



## STRENGTHS AND LIMITATIONS OF THIS STUDY

- A wide range of stakeholders provided their reflections of the achievement of the ultimate goal of the National Medicines Information Strategy three years after its launch.
- A majority of the stakeholder representatives were healthcare professionals, half of them being pharmacists which may have skewed the results.
- Absence of real patients with chronic illnesses and medications may distort results.
- The dynamics of the interviews may have been influenced by the fact that they were conducted as individual, pair or group interviews according to convenience of each stakeholder.
- In the conceptual model building, the breakdown of the data to macro, meso and micro levels assisted in constructing a holistic understanding of the medication use process and its development needs.

## INTRODUCTION

Carrying out long-term medication is a collaborative process whereby the ultimate goal is well-informed patients who have capability, and motivation to, self-manage their medications. Team-based and patient-centered care emphasises the roles and tasks of each healthcare provider involved in the care process to ensure medication use in a high-quality, safe, effective, economical and rational manner.<sup>1</sup> Part of this collaborative team should be the patients themselves so that they can take responsibility for their own care and become empowered for self-management and self-care.<sup>2</sup> Although all healthcare professionals involved in the medication use process should have clearly determined responsibilities and tasks, there still exists ambiguity in this respect.<sup>3-5</sup> Among healthcare professionals there is uncertainty about their own roles and tasks, as well as those of other professionals.<sup>6-8</sup> If the roles and tasks are not agreed upon, it can lead to preventable risk situations, medication errors or omissions.<sup>3,9-11</sup> It can also lead to a preventable increase in the medication-related burden for patients and impair their lived experience with the medication,<sup>12</sup> e.g., through inadequate support from the social and health service system at different phases of a long-term journey with a chronic illness.<sup>13,14</sup>

Easy access to reliable and timely health and MI is an integral part of the successful medication use process for both healthcare providers and medicine users.<sup>15-21</sup> This is a strategic issue which has been recognised, e.g., by the European Commission.<sup>16,22</sup> Finland is one of the few countries that have actually established a long-term strategic development plan for enhancing coordination between national key stakeholders involved in producing and using MI.<sup>17,23-25</sup> In Finland, MI practices have been actively developed since the 1980s, especially in community pharmacies (Appendix A).<sup>26-30</sup> Patients have a statutory right to receive information about their medicines from their healthcare providers, physicians and pharmacists being mandated to counsel on safe and appropriate medicine use while prescribing and dispensing.<sup>31,32</sup> The current national medicines policy (2011–2020) prioritises the development of MI practices, particularly to improve coordination between MI providers and to enhance the use of MI sources in patient care.<sup>23</sup> To implement these medicines policy actions, the Finnish Medicines Agency Fimea launched a National Medicines Information Strategy in 2012 with the ultimate goal of a well-implemented medication use process that will result in well-informed and adherent patients by 2020.<sup>24,25</sup> The special emphasis of the Strategy is on patients with long-term medications. The aim of this study was to evaluate the

1  
2  
3 implementation of the Strategy after the first three-year operational period (2012–2014) in  
4 2015.  
5  
6  
7

## 8 **METHODS**

9

### 10 **Key content of the Strategy**

11

12  
13  
14  
15 The National Medicines Information Strategy was established by Fimea which also  
16 coordinates its implementation.<sup>24,25</sup> The Strategy builds on the European Commission  
17 recommendations on MI to patients.<sup>16</sup> The situation in other EU countries was investigated by  
18 conducting an inventory of MI strategies in the EU countries in 2009.<sup>33</sup> As the UK was found  
19 to have most advanced and systematic MI practices within EU, their MI strategy “Better  
20 Information, Better Choices, Better Health” was analysed more in detail.<sup>34,35</sup> To understand  
21 MI practices in Finland, an inventory of the MI research conducted in Finland since 2000 was  
22 carried out to identify strengths and development needs in MI.<sup>28,36</sup> Also potential stakeholders  
23 to be involved in the Strategy’s implementation were interviewed to identify their views on  
24 strategic core contents and proposals for actions.<sup>25</sup>  
25  
26  
27  
28  
29  
30  
31  
32  
33

34 The ultimate goal of the Strategy was influenced by the Chronic Care Model,<sup>37,38</sup> which was  
35 quite extensively piloted in Finland in the beginning of the 2010s (i.e., at the time the Strategy  
36 was established) as a potential basis for a new social and health services system.<sup>39</sup> The Model  
37 puts the patient into the center and encourages creation of structures and processes that support  
38 self-management of chronic diseases. The Model is applicable to MI as there is a wealth  
39 evidence, both globally and from Finland, that patients do not receive adequate support to  
40 self-manage their medication,<sup>21,40-44</sup> and adherence to treatment is still an unresolved issue.<sup>2,45-  
41  
42  
43  
44  
45  
46  
47  
48  
49  
50</sup>

51 Appendix B shows the modifications of the Chronic Care model used in the Strategy. A key  
52 process for patients with long-term medications is the medication use process illustrated in  
53 Appendix B. The medication use process covers activities for the need assessment for  
54 medication, selection of the medication and prescribing, dispensing, dosing and  
55 administration, patient motivation and counselling to support adherence and self-  
56 management, treatment follow-up and assessment of outcomes.<sup>24</sup> The patient-specific  
57 medication plan is an important part of the medication use process which facilitates  
58  
59  
60

1  
2  
3 implementation of the medication and communication on it between the patient and  
4 participating healthcare providers and organisations. This “patient at the center” model is also  
5 in line with the pharmaceutical care process introduced by the landmark article of Hepler and  
6 Strand in 1990.<sup>51</sup>  
7  
8  
9

10  
11 The Strategy has 6 main goals and 37 proposals for actions.<sup>24</sup> Its implementation is divided  
12 into three operational periods (years 2012–2014; 2015–2017; and 2018–2020). The Strategy  
13 aims 1) to influence the quality, availability and utilisation of MI targeted to consumers and  
14 healthcare professionals, 2) to enhance professionals’ MI training and competences, and 3) to  
15 focus MI research to guide strategy work. Four working groups and their coordination group,  
16 i.e., The National Medicines Information Network, form the primary resource for Strategy’s  
17 implementation (see Table 1).<sup>24,25</sup>  
18  
19  
20  
21  
22  
23  
24  
25

### 26 **Study design and setting**

27  
28 The medicine use process with the patient at the center (Appendix B) was chosen as a target  
29 of the Strategy’s evaluation. The study applied pragmatic approach and the evaluation was  
30 based on reflections of the members of The National Medicines Information Network. A  
31 qualitative cross-sectional design with semi-structured interviews among the members of the  
32 Network was used. The interviews were performed after the first three-year operational period  
33 (2012–2014) of the Strategy in 2015. During that operational period, the Network had 111  
34 members representing 53 stakeholder organisations. First, an invitation to participate in the  
35 interview was sent to all members of the network via email. A more detailed information letter  
36 was sent to those who agreed to participate in the study.  
37  
38  
39  
40  
41  
42  
43  
44  
45

### 46 **Interview guide**

47  
48 A semi-structured interview guide with two main themes and eight sub-themes focusing on  
49 the goals and actions of the National Medicines Information Strategy was developed.<sup>24</sup> The  
50 interview guide was pre-tested in two pilot interviews with six participants. No significant  
51 changes were made based on the pilot, and therefore, the data from the pilots were included  
52 in the study. The two main themes discussed in the interviews pertained to: 1) reaching the  
53 goals and implementing the actions of the Strategy, and 2) actions taken by The National  
54 Medicines Information Network. This study focused on the first main theme and the following  
55  
56  
57  
58  
59  
60

1  
2  
3 questions in the interview guide: “If you consider the figure of medication use process for a  
4 patient with chronic diseases, then: 1) what are the most crucial actions that have been  
5 implemented, and 2) what actions should be focused upon in the future in order to achieve the  
6 goal of a well-informed, adherent patient or medicine user?” The figure of the medication use  
7 process as illustrated in the Strategy was shown to the participants to stimulate discussion  
8 during the interview (Appendix B).<sup>24</sup>  
9  
10  
11  
12  
13  
14

### 15 **Data collection**

16  
17  
18 Interviews were conducted as individual, pair and group interviews depending on the  
19 preference of each stakeholder in 2015. The aim was to have only one stakeholder organisation  
20 in each interview. Due to the geographical location and schedules of the participants,  
21 interviews were conducted face-to-face, by telephone or via video conferencing. One  
22 moderator NM (female pharmacist, MSc, with training in qualitative interviews) facilitated  
23 and audiotaped all interviews with permission from the participants.  
24  
25  
26  
27  
28  
29

### 30 **Analysis**

31  
32  
33 Data were analysed by applying the Framework Method that utilises both deductive and  
34 inductive content analysis (Fig. 1).<sup>52</sup> The analysis was carried out in stages using Microsoft  
35 Word and Excel (Windows 10 Home). The interviews were transcribed verbatim by a  
36 company specialised in converting to written text qualitative research data (*Stage 1*). Each  
37 transcript was repeatedly read by one researcher (NM), while listening to the audiotapes  
38 (*Stage 2*). Single words, sentences or groups of sentences related to study questions were  
39 coded by one researcher (NM) and verified by another researcher (MPM) (*Stage 3*). Any  
40 differences of interpretation were discussed with the research group and consensus was  
41 received. Once the key categories were identified inductively, the transcripts were purposively  
42 read to detect any discussion that deviated from these categories and an analytical matrix was  
43 developed (*Stage 4*). Main and sub-categories were primarily developed deductively  
44 according to the medication use process published previously in the National Medicines  
45 Information Strategy (Appendix B)<sup>24</sup> (*Stage 5*). Additionally, new main and sub-categories  
46 were inductively derived from the interview data. Codes were classified into main categories,  
47 and the encoded data were charted into a spreadsheet generated from the analytical matrix  
48 (*Stage 6*). Based on the existing medication use process model (Appendix B), and  
49  
50  
51  
52  
53  
54  
55  
56  
57  
58  
59  
60

1  
2  
3 complemented with participants' views identified from the interviews, a new conceptual  
4 framework of the medication use process was developed (*Stage 7*). The results are presented  
5 in accordance with two main research questions, i.e., stakeholders' views on: 1) the well-  
6 implemented actions, and 2) the actions needing development in the medication use process.  
7  
8 The results are classified into three operational levels: infrastructure (*macro*), healthcare  
9 professional (*meso*) and patient (*micro*) level. This follows the conceptual framework applied  
10 to combine the functions of primary care with the dimensions of integrated care.<sup>53</sup> Numbers  
11 of encodings were counted according to the mentions by each participant and the summative  
12 numbers were set into the operational levels. The standards for reporting qualitative research  
13 (SRQR) was utilised when applicable.<sup>54</sup>  
14  
15  
16  
17  
18  
19  
20  
21

22 Add figure 1 in here.  
23  
24

### 25 **Ensuring rigor of the analysis**

26  
27  
28

29 In the conceptual model building, breakdown of the data to *macro*, *meso* and *micro* levels was  
30 used.<sup>53</sup> *Trustworthiness* of the analysis process was confirmed in every phase, including data  
31 preparation (e.g., verbatim transcripts), management of data (e.g., software was used in data  
32 coding) and reporting of results (e.g., a single coder with a reviewer).<sup>55,56</sup> To ensure the  
33 *credibility*, a previously known model of a medication use process<sup>24</sup> was used as an analysis  
34 matrix, supplemented with the main and sub-categories identified inductively from the data.  
35 Additionally, a theoretical method used previously in healthcare research<sup>52</sup> was applied in  
36 analysing data to strengthen *credibility*. To increase the *comprehensivity* of the study, two  
37 researchers – and when necessary the whole research group – were involved in the data  
38 analysis process. The content and structure of concepts created by content analysis were  
39 illustrated with the examples of quotations from various participants to indicate  
40 *conformability* and *objectivity*. Quotations have been selected to represent the identified main  
41 and sub-categories in the new conceptual framework developed for the medication use  
42 process.  
43  
44  
45  
46  
47  
48  
49  
50  
51  
52  
53  
54  
55  
56  
57  
58  
59  
60

## Research ethics

The study was conducted according to good scientific practice, following the guidelines of the Finnish Advisory Board on Research Integrity.<sup>57</sup> According to the guidelines, the study was deemed to be exempt from requiring approval from the research ethics committee. The research plan was approved by The National Medicines Information Network before starting the data collection. Prior to the interviews, participants were informed in writing about the study and that the interviews will be tape-recorded. At the beginning of each interview they were asked to give informed consent. Participation was voluntary with the opportunity to withdraw from the study at any time. The recordings and interview notes were digitally stored behind a password. All data were anonymised and were accessible only to the authors. Privacy and confidentiality of the individuals participating in the study were ensured throughout the entire research project.

## Patient and public involvement

Patient participation was taken into account by interviewing representatives from various national patient organisations who were active partners in The National Medicines Information Network. There was no real patients or public involvement in the planning phase or design of the study. The results of the study will be discussed in the Network for further actions of the Strategy that will be extended to a new term lasting until 2026.

## RESULTS

In total, 79 out of 111 members of The National Medicines Information Network participated in the study (participation rate 71%) representing 42 out of 53 stakeholders (Table 1). Females represented 77% (n=61) of participants. Interviews (n=43) were conducted as individual (n=22), pair (n=11) or group interviews (n=10), either face-to-face (79%, n=34), by telephone (12%, n=5), as video conferencing (7%, n=3) or as face-to-face and video conferencing (2%, n=1). Altogether, 3–6 participants attended the group interviews at a time. Four interviews included participants from more than one stakeholder organisations. A majority of the participants were pharmacists (43% of all participants, n=34), physicians (22%, n=17) and nurses (15%, n=12). Educational units were the most commonly represented stakeholder

group (24% of the stakeholder organisations, n=10), including universities, polytechnics, vocational institutions and continuing education units.

**Table 1** Characteristics of the individual stakeholder representatives (n=79) and the stakeholder organisations (n=42) participating in the study. (n=number of individual stakeholder representatives or stakeholder organisations)

| Stakeholders by profession                                                                                        | Individual stakeholder representatives who participated in the study |      | Individual stakeholder representatives in the Network <sup>a</sup> |      |
|-------------------------------------------------------------------------------------------------------------------|----------------------------------------------------------------------|------|--------------------------------------------------------------------|------|
|                                                                                                                   | n                                                                    | %    | n                                                                  | %    |
| Pharmacists                                                                                                       | 34                                                                   | 43.0 | 41                                                                 | 36.9 |
| Physicians                                                                                                        | 17                                                                   | 21.5 | 22                                                                 | 19.8 |
| Nurses                                                                                                            | 12                                                                   | 15.2 | 15                                                                 | 13.5 |
| Others                                                                                                            | 11                                                                   | 13.9 | 21                                                                 | 18.9 |
| Practical nurses                                                                                                  | 2                                                                    | 2.5  | 2                                                                  | 1.8  |
| Healthcare students                                                                                               | 1 <sup>b</sup>                                                       | 1.3  | 4 <sup>b-e</sup>                                                   | 3.6  |
| Dentists                                                                                                          | 0                                                                    | 0    | 1                                                                  | 0.9  |
| Not known                                                                                                         | 2                                                                    | 2.5  | 5                                                                  | 4.5  |
| Altogether                                                                                                        | 79                                                                   |      | 111                                                                |      |
| Stakeholders by type of affiliation                                                                               | Stakeholder organisations that participated in the study             |      | Stakeholder organisations represented in the Network <sup>a</sup>  |      |
|                                                                                                                   | n                                                                    | %    | n                                                                  | %    |
| Healthcare centers, hospitals and hospital districts, hospital pharmacies and dispensaries, university pharmacies | 8                                                                    | 19.0 | 8                                                                  | 15.1 |
| Patient associations and organisations                                                                            | 8                                                                    | 19.0 | 10                                                                 | 18.9 |
| Professional organisations                                                                                        | 7 <sup>b,d,e</sup>                                                   | 16.7 | 8 <sup>b-e</sup>                                                   | 15.1 |
| Universities                                                                                                      | 6 <sup>b,d,e</sup>                                                   | 14.3 | 6 <sup>b,d,e</sup>                                                 | 11.3 |
| Scientific societies                                                                                              | 4 <sup>b,d,f,g</sup>                                                 | 9.5  | 5 <sup>b,d,f,g</sup>                                               | 9.4  |
| Polytechnics, vocational institutions                                                                             | 3 <sup>e,h</sup>                                                     | 7.1  | 5 <sup>e,h</sup>                                                   | 9.4  |
| National authorities                                                                                              | 2                                                                    | 4.8  | 3                                                                  | 5.7  |
| Organisations representing pharmaceutical industry                                                                | 2                                                                    | 4.8  | 2                                                                  | 3.8  |
| Continuing education units                                                                                        | 1 <sup>b</sup>                                                       | 2.4  | 1 <sup>b</sup>                                                     | 1.9  |
| Student associations                                                                                              | 1 <sup>b</sup>                                                       | 2.4  | 4 <sup>b-e</sup>                                                   | 7.5  |
| Others                                                                                                            | 0                                                                    | 0    | 1                                                                  | 1.9  |
| Altogether                                                                                                        | 42                                                                   |      | 53                                                                 |      |

<sup>a</sup>The National Medicines Information Network, <sup>b</sup>pharmacy, <sup>c</sup>dentistry, <sup>d</sup>medicine, <sup>e</sup>nursing, <sup>f</sup>clinical pharmacology, <sup>g</sup>psychiatry, <sup>h</sup>practical nursing.

## Well-implemented actions in the medication use process

The new conceptual framework illustrating well-implemented actions in the medication use process consisted of ten main categories of actions (Fig. 2 and 3). Of these, seven were derived deductively from the previous medication use process model (Appendix B) and three were inductively derived from the data (Fig. 3). All the inductively derived categories were at the infrastructure (*macro*) level. Around half of the participants (52%) reported well-implemented actions, mostly at the meso level (i.e., healthcare professionals). Of these actions, medication counselling by community pharmacists was considered as the best implemented (n=26



1  
2  
3 mentions), followed by physicians' performance while starting a medication (n=14), and  
4 advice and guidance provided by nurses (n=14) (Appendix C).  
5  
6  
7

8 Add figure 2 in here.  
9

10  
11 Add figure 3 in here.  
12  
13

14  
15 Very few mentions of the well-implemented actions at the infrastructure (*macro*) level were  
16 present (Fig. 3). These related to the patient information transfer and electronic health records  
17 (EHRs) (n=4 mentions of being well-implemented) and multiprofessional collaboration (n=2),  
18 while none of the stakeholders mentioned management of the entire medication use process  
19 (n=0) or specialist services (n=0) as well-implemented.  
20  
21  
22  
23

### 24 25 **Actions needing development in the medication use process** 26

27  
28  
29 The stakeholders mentioned far more actions for development than well-established practices  
30 in the medication use process (211 vs. 68 mentions, respectively) (Fig. 2, 3 and 4). Almost all  
31 participants (94%) raised at least one area for improvement (Fig. 2 and 4, Appendix C). The  
32 highest number of mentions indicating a need for development concerned medication use  
33 process in home care and social care (*meso*) (n=34), patient information transfer and EHRs,  
34 including update medication lists (*macro*) (n=33), and patients' management with the  
35 medication (*micro*) (n=27). At the infrastructure (*macro*) level, management of the entire  
36 medication use process (n=24) and multiprofessional collaboration (n=23) were also  
37 frequently mentioned as areas for development.  
38  
39  
40  
41  
42  
43  
44

45  
46 Add figure 4 in here.  
47  
48

49  
50 In the medication use process in home care and social care units, such as nursing homes, most  
51 of the concerns related to skills, competences and inadequate training of practical nurses to  
52 appropriately manage medications of their older clients (Fig. 4). A need for additional training  
53 in pharmacotherapy was raised, particularly for home care and nursing home staff to meet the  
54 requirements of their current work duties in geriatric care. Inadequate patient information  
55 transfer between care units and limited availability of EHRs in the medication use process  
56 were among the major concerns as not all professionals involved in the care team have access  
57  
58  
59  
60

1  
2  
3 to complete and accurate patient information, such as laboratory results, or when the patient  
4 is transferred from a care unit to another. In addition, many stakeholders reported that the  
5 management of the entire medication use process needed development indicating  
6 fragmentation, lack of coordination and poor collaboration between different healthcare  
7 professionals and between professionals and patients. They also expressed concerns on  
8 treatment monitoring as it was not commonly conducted very systematically.  
9  
10  
11  
12  
13  
14

15 Finally, poor patient involvement during the entire medication use process was a concern  
16 reflecting a lack of motivation or adherence to treatment and an inability or unwillingness to  
17 communicate with healthcare professionals (Fig. 4). A further concern was that patients do  
18 not always have updated medication lists or treatment plans, which may not only challenge  
19 healthcare professionals at the point of prescribing and dispensing medicines, but also patients  
20 while using medicines at home. Additionally, patients' limited skills in searching reliable  
21 health and MI and insufficient medication counselling for particular patient groups, such as  
22 the deaf, people with vision impairment and using multiple medications, were identified as  
23 areas needing attention.  
24  
25  
26  
27  
28  
29  
30  
31

## 32 **DISCUSSION**

33  
34  
35  
36 This study revealed that the medication use process of chronically ill patients using long-term  
37 medications requires development at every level of implementation. The major development  
38 needs in the infrastructure concern the coordination and management of care, transfer of  
39 patient information between care units, availability of a reconciled medication list, and local  
40 and national agreements on responsibilities of patients and professionals involved in the  
41 medication use process. The most urgent development needs at professional level focus on the  
42 entire medication use process in primary and social care, particularly in geriatric units where  
43 practical nurses' competences do not meet their actual work responsibilities. The current  
44 medication use process lacks genuine patient-centeredness, manifested by a lack of adherence,  
45 motivation and communication, and the inability of patients to retrieve information. Patients  
46 on long-term medications need to be better involved in implementing their treatment by  
47 improving empowerment and partnership, and by finding new ways to support self-  
48 management and treatment commitment.  
49  
50  
51  
52  
53  
54  
55  
56  
57  
58  
59  
60

1  
2  
3 According to the stakeholders, challenges in implementing the medication use process appear  
4 to be the greatest in primary care, especially in home care and social care units such as in  
5 nursing homes. This means social and healthcare units providing care for older adults in the  
6 poorest health conditions. The result may reflect that the Finnish population is aging rapidly  
7 and the care system has not been adequately prepared for the growing need, for example, to  
8 train care personnel in geriatric pharmacotherapy to safely manage the medications. This is  
9 particularly the case for practical nurses whose responsibility for medication management in  
10 geriatric care units has increased remarkably even though their pharmacotherapy training is  
11 limited. Practical nurses have 3-year vocational education that focuses on supportive and  
12 technical nursing, and, thus, they may not have adequate competence to take responsibility  
13 for medication. This finding is in line with previous studies showing that nursing personnel  
14 (e.g., practical nurses) working in home care and social welfare units may lack  
15 pharmacotherapy knowledge and skills also in providing MI.<sup>28,58-61</sup> The same trend and  
16 challenges have been found in other research and development programs in Finland and other  
17 countries.<sup>58,59</sup> The challenge of safe management of medications and polypharmacy of older  
18 adults have been prioritised globally in the ongoing WHO Global Patient Safety Program  
19 “Medication Without Harm”.<sup>62</sup> Further research should focus on geriatric care units in primary  
20 and social care to better understand the systems-based root causes and contributing factors of  
21 actual and potential risks in the current medication use processes.  
22  
23  
24  
25  
26  
27  
28  
29  
30  
31  
32  
33  
34  
35  
36

37 Despite the pharmaceutical policy initiatives and wide recognition internationally of the  
38 importance of patient empowerment and involvement in healthcare,<sup>2,62</sup> our study reflects that  
39 it might not actualise in the best possible way. It is worth remembering that a majority of the  
40 interviewees in this study were health professionals, even where they represented the voice of  
41 patients. Thus, the results are skewed to a professional opinion even in the patient perspective.  
42 Nevertheless, the results send a clear message that patients’ involvement in their long-term  
43 medication should be significantly increased. To be successful, research and actions should  
44 focus on patient approach in the implementation of long-term medications. Only the patients  
45 themselves can describe the issues that matter to them affecting their motivation for treatment,  
46 success of self-management and empowerment. Future studies should focus on real patients  
47 to explore their perceptions and experiences.  
48  
49  
50  
51  
52  
53  
54  
55  
56  
57  
58  
59  
60

1  
2  
3 In this study, the stakeholders reported that patients are not often willing to discuss about their  
4 medications and medication-related problems. This may reflect their preferences, or capacity  
5 for participation, or uncertainty about the responsibilities and tasks of patients' and different  
6 healthcare professionals in the medication use process. Communicative relationship between  
7 healthcare professionals and patients is an essential driver for patient involvement in the  
8 medication use process, and for motivation for self-management and empowerment with  
9 medication use, especially for those with long-term medications.<sup>37,38,51,63-65</sup> Healthcare  
10 professionals should encourage patients to share experiences and concerns about their  
11 treatment. They also need to ensure access to MI throughout the process. Although the number  
12 of MI sources available for patients has increased, people might not always receive MI from  
13 any sources.<sup>16,17,22</sup> In Finland, the proportion of patients who report not receiving information  
14 on medicines they use from any healthcare professional have more than doubled between 1999  
15 and 2014.<sup>21</sup> Actions are needed to ensure equal access of MI for all patients and throughout  
16 the medication use process to support self-management and empowerment.  
17  
18  
19  
20  
21  
22  
23  
24  
25  
26  
27  
28

29 Infrastructural factors leading to poor access to patient and MI and poor adherence, such as  
30 lack of update medication lists and treatment plans, and lack of personal communication with  
31 care providers should be further investigated from a patient perspective.<sup>13,66</sup> Especially, an  
32 update medication list is essential for professionals and patients. For example, guidelines for  
33 patient-centered therapeutic counselling assume that the practitioner should review available  
34 patient information before the encounter and use the information gathered to determine what  
35 to discuss and agree on the treatment with the medicine user.<sup>28,30,67</sup>  
36  
37  
38  
39  
40  
41  
42

43 Since this evaluation was conducted in 2015, shortcomings found in the infrastructure of the  
44 medication use process related to the coordination and availability of electronic health records  
45 have been recognised in the ongoing Rational Pharmacotherapy Action Plan 2022.<sup>63</sup> The  
46 Government Program<sup>68,69</sup> based action plan is intended to strengthen the actions at the  
47 infrastructure level which were minor in 2015. At the same time, it extends the scope of  
48 development towards the meta level, including health and medicines policy making that can  
49 facilitate infrastructural changes in the medication use process through information guidance,  
50 resource allocation and legislation.<sup>70</sup>  
51  
52  
53  
54  
55  
56  
57  
58  
59  
60

### Strengths and limitations of this study

This pragmatic evaluation was carried out at an early stage of Strategy's implementation. The aim was to conduct an evaluation by interviewing in order to obtain more detailed information from the stakeholders than would have been obtained, for example, through a survey. The interviews covered the whole range of stakeholders actively involved in implementing the Strategy. They can be assumed to be informants with the best understanding of the topic of research. However, a majority of the stakeholder representatives were healthcare professionals, half of them being pharmacists which may have skewed the results. There was also an absence of real patients with chronic illnesses and medications which may distort results. The dynamics of the interviews may have been influenced by the fact that they were conducted as individual, pair or group interviews according to convenience of each stakeholder. The data from different types of interviews were combined and the relative power of the opinions was determined by counting the mentions for each action. The profession or stakeholder group was not specified during the analysis, as the aim was to obtain an overall understanding of the implementation of medication use process rather than to compare views between professions or stakeholders. Moreover, participants' demographics, except gender, were not collected. The figure of the medication use process (Appendix B) was an important tool in the interviews to keep the discussion focused on core issues. Furthermore, the figure was also utilised as a framework in the deductive analysis which was supplemented with inductive analysis of the interview data. Thus, the figure was the basis for conducting the study and it has a strong influence on the study findings.

### Implications and future research

This has been an eye-opening study that has helped to understand the functionality and shortcomings of the entire medication use process. The theory-base, conceptual model and methodology applied in this study may be useful for future follow up evaluations, or evaluating medication use processes in other settings. Future research should focus on investigating root causes for poor patient involvement in their own care. To improve medication adherence, the medication use process should be developed on a patient-oriented basis. This requires more qualitative research that listens to the long-term patients' experiences and modifies the medication use process accordingly.

## CONCLUSIONS

Weaknesses in the infrastructure of the medication use process reflecting on the transfer of patient information, poorly functioning medication use processes in primary care and limited participation of patients in their care are priority areas while implementing the next steps of the National Medicines Information Strategy. Many of the challenges identified in this evaluation have been taken into consideration in the Strategy's implementation since 2015, the major challenges also in the Rational Pharmacotherapy Action Plan 2018–2022 by the Ministry of Social Affairs and Health.

---

**Acknowledgements** The authors gratefully acknowledge the members of The National Medicines Information Network who participated in this study. The authors acknowledge the Elli Turunen Fund of the Finnish Cultural Foundation for providing funding. The authors warmly thank Perihan Ipek for assistance in collecting the data, and AMNielsen ApS and Chelsea Schneider for proofreading the manuscript.

**Contributors** NM, MA, MP-M and KH-A have been involved in designing the study, developing the interview guide, planning the analysis and reporting this particular study. NM performed the interviews and data analysis. MP-M verified the codings of the data. MA, MP-M and KH-A contributed in the interpretation of the data. NM prepared the initial draft of the manuscript. MA, MP-M and KH-A critically reviewed and revised the manuscript. All authors read and gave the final approval of the version to be published.

**Funding** This research was supported by the Elli Turunen Fund of the Finnish Cultural Foundation. The sponsors had no role in design and conduct of the study; collection, management, analysis, and interpretation of the data; or in preparation, review, or approval of the manuscript.

**Competing interests** None declared.

**Patient consent for publication** Not required.

**Data availability statement** No additional data available.

## REFERENCES

- 1 World Health Organization. Innovative care for chronic conditions: Building blocks for actions. Global report. World Health Organization, 2002. [www.who.int/chp/knowledge/publications/icccreport/en/](http://www.who.int/chp/knowledge/publications/icccreport/en/) (Accessed 10 Dec 2019).
- 2 World Health Organization. Adherence to long-term therapies: Evidence for action. World Health Organization, 2003. [www.who.int/chp/knowledge/publications/adherence\\_report/en/](http://www.who.int/chp/knowledge/publications/adherence_report/en/) (Accessed 10 Dec 2019).
- 3 Celio J, Ninane F, Bugnon O, Schneider MP. Pharmacist-nurse collaborations in medication adherence-enhancing interventions: A review. *Patient Educ Couns* 2018;101:1175–92.
- 4 Olsen CF, Bergland A, Debesay J, Bye A, Langaas AG. Striking a balance: Health care providers' experiences with home-based, patient-centered care for older people – A meta-synthesis of qualitative studies. *Patient Educ Couns* 2019;102:1991–2000.
- 5 Toivo T, Dimitrow M, Puustinen J, et al. Coordinating resources for prospective medication risk management of older home care clients in primary care: Procedure development and RCT study design for demonstrating its effectiveness. *BMC Geriatr* 2018;18:74.
- 6 Elvey R, Hassell K, Hall J. Who do you think you are? Pharmacists' perceptions of their professional identity. *Int J Pharm Pract* 2013;21:322–32.
- 7 Kusi-Appiah E, Dahlke S, Stahlke S. Nursing care providers' perceptions on their role contributions in patient care: An integrative review. *J Clin Nurs* 2018;27:3830–45.
- 8 Lawrence RA, McLoone JK, Wakefield CE, Cohn RJ. Primary care physicians' perspectives of their role in cancer care: A systematic review. *J Gen Intern Med* 2016;31:1222–36.
- 9 Berland A, Bentsen SB. Medication errors in home care: A qualitative focus group study. *J Clin Nurs* 2017;26:3734–41.
- 10 Teinilä T, Kaunisvesi K, Airaksinen M. Primary care physicians' perceptions of medication errors and error prevention in cooperation with community pharmacists. *Res Social Adm Pharm* 2011;7:162–79.
- 11 van Sluisveld N, Zegers M, Natsch S, Wollersheim H. Medication reconciliation at hospital admission and discharge: Insufficient knowledge, unclear task reallocation and lack of collaboration as major barriers to medication safety. *BMC Health Serv Res* 2012;12:170.
- 12 Mohammed AM, Moles RJ, Chen TF. Medication-related burden and patients' lived experience with medicine: A systematic review and metasynthesis of qualitative studies. *BMJ Open* 2016;6:e010035.
- 13 Kekäle M. Chronic myeloid leukemia patients' adherence to tyrosine kinase inhibitors in Finland: A journey of eighty-six patients [dissertation]. University of Helsinki, 2016. <http://urn.fi/URN:ISBN:978-951-51-2353-4>.

1  
2  
3  
4 14 Puspitasari HP, Aslani P, Krass I. Pharmacists' and consumers' viewpoints on counselling  
5 on prescription medicines in Australian community pharmacies. *Int J Pharm Pract*  
6 2010;18:202–8.  
7

8  
9 15 Chisholm-Burns MA, Lee JK, Spivey CA, et al. US pharmacists' effect as team members  
10 on patient care: Systematic review and meta-analyses. *Med Care* 2010;48:923–33.  
11

12 16 European Commission. High Level Pharmaceutical Forum 2005-2008: Conclusions and  
13 recommendations. European Communities, 2008.  
14 [https://publications.europa.eu/en/publication-detail/-/publication/4fddf639-47cc-4f90-9964-](https://publications.europa.eu/en/publication-detail/-/publication/4fddf639-47cc-4f90-9964-142757d2515a)  
15 [142757d2515a](https://publications.europa.eu/en/publication-detail/-/publication/4fddf639-47cc-4f90-9964-142757d2515a) (Accessed 10 Dec 2019).  
16

17  
18 17 International Pharmaceutical Federation. Medicines information: strategic development.  
19 The Hague: International Pharmaceutical Federation, 2017.  
20 [www.fip.org/www/streamfile.php?filename=fip/publications/2017-01-Medicines-](http://www.fip.org/www/streamfile.php?filename=fip/publications/2017-01-Medicines-information-strategic-development.pdf)  
21 [information-strategic-development.pdf](http://www.fip.org/www/streamfile.php?filename=fip/publications/2017-01-Medicines-information-strategic-development.pdf) (Accessed 10 Dec 2019).  
22

23  
24 18 Ryan R, Santesso N, Lowe D, et al. Interventions to improve safe and effective medicines  
25 use by consumers: An overview of systematic reviews. *Cochrane Database Syst Rev*  
26 2014;CD007768.  
27

28  
29 19 Van Camp YP, Van Rompaey B, Elseviers MM. Nurse-led interventions to enhance  
30 adherence to chronic medication: Systematic review and meta-analysis of randomised  
31 controlled trials. *Eur J Clin Pharmacol* 2013;69:761–70.  
32

33 20 Zolnieriek KBH, DiMatteo MR. Physician communication and patient adherence to  
34 treatment: A meta-analysis. *Med Care* 2009;47:826–34.  
35

36  
37 21 Mononen N, Airaksinen MSA, Hämeen-Anttila K, Helakorpi S, Pohjanoksa-Mäntylä M.  
38 Trends in the receipt of medicines information among Finnish adults in 1999–2014: A  
39 nationwide repeated cross-sectional survey. *BMJ Open* 2019;9:e026377.  
40

41 22 European Commission. High Level Group on innovation and provision of medicines in  
42 the European Union: Recommendations for action. G10 Medicines report. European  
43 Communities, 2002. [http://ec.europa.eu/health/ph\\_overview/Documents/key08\\_en.pdf](http://ec.europa.eu/health/ph_overview/Documents/key08_en.pdf)  
44 (Accessed 10 Dec 2019).  
45

46  
47 23 Ministry of Social Affairs and Health. Medicines Policy 2020: Towards efficient, safe,  
48 rational and cost effective use of medicines. Publications of the Ministry of Social Affairs  
49 and Health, 2011. <http://urn.fi/URN:ISBN:978-952-00-3165-7> (Accessed 10 Dec 2019).  
50

51 24 Finnish Medicines Agency Fimea. Rational use of medicines through information and  
52 guidance – Medicines information services: Current state and strategy for 2020. Serial  
53 Publication Fimea Develops, Assesses and Informs, 2012. [http://urn.fi/URN:ISBN:978-952-](http://urn.fi/URN:ISBN:978-952-5624-21-2)  
54 [5624-21-2](http://urn.fi/URN:ISBN:978-952-5624-21-2) (Accessed 10 Dec 2019).  
55

56  
57 25 Hämeen-Anttila K, Luhtanen S, Airaksinen M, Pohjanoksa-Mäntylä M. Developing a  
58 national medicines information strategy in Finland – A stakeholders' perspective on the  
59 strengths, challenges and opportunities in medicines information. *Health Policy*  
60 2013;111:200–5.



- 1  
2  
3  
4 26 Airaksinen M, Ahonen R, Enlund H. The questions to ask about your medicines  
5 campaign – An evaluation of pharmacists and the public’s response. *Med Care*  
6 1998;36:422–7.  
7  
8  
9 27 Kansanaho H. Implementation of the principles of patient counselling into practice in  
10 Finnish community pharmacies [dissertation]. University of Helsinki, 2006.  
11 <http://urn.fi/URN:ISBN:952-10-2877-7>.  
12 28 Mononen N, Järvinen R, Hämeen-Anttila K, et al. A national approach to medicines  
13 information research: A systematic review. *Res Social Adm Pharm* 2018;14:1106–24.  
14  
15 29 Pohjanoksa-Mäntylä M. Medicines information sources and services for consumers: A  
16 special focus on the Internet and people with depression [dissertation]. University of  
17 Helsinki, 2010. <http://urn.fi/URN:ISBN:978-952-10-6128-8>.  
18  
19 30 Puumalainen I. Development of instruments to measure the quality of patient counselling  
20 [dissertation]. University of Kuopio, 2005. <http://urn.fi/URN:ISBN:951-27-0053-0>.  
21  
22 31 Medicines Act (Finland) 395/1987. [https://www.finlex.fi/fi/laki/ajantasa/1987/](https://www.finlex.fi/fi/laki/ajantasa/1987/19870395)  
23 19870395 (Accessed 10 Dec 2019).  
24  
25 32 Decree on the prescription of medicines 1088/2010.  
26 <https://www.finlex.fi/fi/laki/alkup/2010/20101088> (Accessed 10 Dec 2019).  
27  
28 33 Salonen I. National Medicines Information Strategy – Medicines related political actions  
29 in Finland and in the European Union in the 21st century to improve the quality and  
30 availability of the medicines information directed to the consumers [master’s thesis].  
31 University of Helsinki, 2010. <http://urn.fi/URN:NBN:fi-fe20180115196> (Accessed 7 Mar  
32 2020).  
33  
34 34 Department of Health. Better information, better choices, better health – Putting  
35 information at the centre of health. London: Department of Health, 2004.  
36  
37 35 Young N. National strategies for health and medicines information in the European  
38 Union: Experiences in the UK and Finland. Report. University of Helsinki, 2010.  
39  
40 36 Järvinen R, Enlund H, Airaksinen M, Kleme J, Mononen N, Hämeen-Anttila K.  
41 Medicines information research in Finland – A report to support the activities of the  
42 Medicines Information Network. Serial Publication Fimea Develops, Assesses and Informs  
43 7/2013. Finnish Medicines Agency, 2013. <http://urn.fi/URN:ISBN:978-952-5624-37-3>  
44 (Accessed 7 Mar 2020).  
45  
46 37 Wagner E.H. Chronic disease management: What will it take to improve care for chronic  
47 illness? *Eff Clin Pract* 1998;1:2–4.  
48  
49 38 Wagner EH, Austin BT, Hindmarsh M, Schaefer J, Bonomi A. Improving chronic illness  
50 care: Translating evidence into action. *Health Aff (Millwood)* 2001;20:64–78.  
51  
52  
53  
54  
55  
56  
57  
58  
59  
60

1  
2  
3 39 Nikander J, Tuominen-Thuesen M. National development programme for social welfare  
4 and health care (KASTE 2010–2015) External evaluation – Final report. Reports and  
5 memorandums of the Ministry of Social Affairs and Health, 2016.  
6 <http://urn.fi/URN:ISBN:978-952-00-3800-7> (Accessed 10 Dec 2019).  
7

8  
9 40 Bults M, Beaujean DJMA, Wijkmans CJ, Timen A, Richardus JH, Voeten HACM. Why  
10 did patients with cardiovascular disease in the Netherlands accept Q fever vaccination?  
11 *Vaccine* 2012;30:3369–75.  
12

13 41 Hamrosi KK, Aslani P, Raynor DK. Beyond needs and expectations: Identifying the  
14 barriers and facilitators to written medicine information provision and use in Australia.  
15 *Health Expect* 2014;17:220–31.  
16

17  
18 42 Hamrosi KK, Raynor DK, Aslani P. Pharmacist, general practitioner and consumer use of  
19 written medicine information in Australia: Are they on the same page? *Res Social Adm*  
20 *Pharm* 2014;10:656–68.  
21

22  
23 43 Hämeen-Anttila K, Pietilä K, Pykkänen L, Pohjanoksa-Mäntylä M. Internet as a source  
24 of medicines information (MI) among frequent internet users. *Res Soc Adm Pharm*  
25 2018;14:758–764.  
26

27  
28 45 Armitage LC, Kassavou A, Sutton S. Do mobile device apps designed to support  
29 medication adherence demonstrate efficacy? A systematic review of randomised controlled  
30 trials, with meta-analysis. *BMJ Open* 2020;10:e032045.  
31

32 46 Baumgartner PC, Haynes RB, Hersberger KE, Arnet I. A systematic review of  
33 medication adherence thresholds dependent of clinical outcomes. *Front Pharmacol*  
34 2018;9:1290.  
35

36  
37 47 Conn VS, Ruppar TM, Enriquez M, Cooper P. Medication adherence interventions that  
38 target subjects with adherence problems: Systematic review and meta-analysis. *Res Social*  
39 *Adm Pharm* 2016;12:218–46.  
40

41 48 Conn VS, Ruppar TM, Enriquez M, Cooper PS. Patient-centered outcomes of medication  
42 adherence interventions: Systematic review and meta-analysis. *Value Health* 2016;19:277–  
43 85.  
44

45  
46 49 Costa E, Giardini A, Savin M, et al. Interventional tools to improve medication  
47 adherence: Review of literature. *Patient Prefer Adherence* 2015;9:1303–14.  
48

49 50 Torres-Robles A, Wiecek E, Tonin FS, Benrimoj SI, Fernandez-Llimos F, Garcia-  
50 CardenasV. Comparison of interventions to improve long-term medication adherence across  
51 different clinical conditions: A systematic review with network meta-analysis. *Front*  
52 *Pharmacol* 2018;9:1454.  
53

54  
55 51 Hepler CD, Strand LM. Opportunities and responsibilities in pharmaceutical care. *Am J*  
56 *Hosp Pharm* 1990;7:533–43.  
57

58 52 Gale NK, Heath G, Cameron E, Rashid S, Redwood S. Using the framework method for  
59 the analysis of qualitative data in multi-disciplinary health research. *BMC Med Res*  
60 *Methodol* 2013;13:117.

1  
2  
3  
4 53 Valentijn PP, Schepman SM. Understanding integrated care: A comprehensive  
5 conceptual framework based on the integrative functions on primary care. *Int J Integr Care*  
6 2013;13:e010.  
7

8  
9 54 O'Brien BC, Harris IB, Beckman TJ, Reed DA, Cook DA. Standards for reporting  
10 qualitative research: a synthesis of recommendations. *Acad Med* 2014;89:1245–51.  
11

12 55 Elo S, Kääriäinen M, Kanste O, Pölkki T, Utriainen K, Kyngäs H. Qualitative content  
13 analysis: A focus on trustworthiness. *SAGE Open* 2014;4.  
14

15 56 Raskind IG, Shelton RC, Comeau DL, Cooper HLF, Griffith DM, Kegler MC. A review  
16 of qualitative data analysis practices in health education and health behavior research.  
17 *Health Educ Behav* 2019; 46:32-39.  
18

19 57 Finnish National Board on Research Integrity TENK. The ethical principles of research  
20 with human participants and ethical review in the human sciences in Finland.  
21 [www.tenk.fi/sites/tenk.fi/files/Ihmistieteiden\\_eettisen\\_ennakkoarvioinnin\\_ohje\\_2019.pdf](http://www.tenk.fi/sites/tenk.fi/files/Ihmistieteiden_eettisen_ennakkoarvioinnin_ohje_2019.pdf)  
22 (Accessed 10 Dec 2019).  
23

24 58 Kallio S, Kumpusalo-Vauhkonen A, Järvensivu T, Mäntylä A, Pohjanoksa-Mäntylä M,  
25 Airaksinen M. Towards interprofessional networking in medication management of the  
26 aged: Current challenges and potential solutions in Finland. *Scand J Prim Health Care*  
27 2016;34:368–76.  
28

29 59 Sawan M, Jeon YH, Chen TF. Relationship between organizational culture and the use of  
30 psychotropic medicines in nursing homes: A systematic integrative review. *Drugs Aging*  
31 2018;35:189–211.  
32

33 60 Sneek S, Saarnio R, Isola A, Boigu R. Medication competency of nurses according to  
34 theoretical and drug calculation online exams: A descriptive correlational study. *Nurse Educ*  
35 *Today* 2016;36:195–201.  
36

37 61 Sulosaari V, Huupponen R, Tornainen K, Hupli M, Puukka P, Leino-Kilpi H.  
38 Medication education in nursing programmes in Finland - Findings from a national survey.  
39 *Collegian* 2014;21:327–35.  
40

41 62 World Health Organization. Medication without harm: Global patient safety challenge on  
42 medication safety. World Health Organization, 2017.  
43 [www.who.int/patientsafety/medication-safety/medication-without-harm-brochure/en/](http://www.who.int/patientsafety/medication-safety/medication-without-harm-brochure/en/)  
44 (Accessed 10 Dec 2019).  
45

46 63 Hämeen-Anttila K, Närhi U, Tahvanainen H. Rational Pharmacotherapy action plan –  
47 Final report. Reports and memorandums of the Ministry of Social Affairs and Health, 2018.  
48 <http://urn.fi/URN:ISBN:978-952-00-3930-1> (Accessed 10 Dec 2019).  
49

50 64 National Institute for Health and Care Excellence NICE. Medicines optimisation: the safe  
51 and effective use of medicines to enable the best possible outcomes. National Institute for  
52 Health and Care Excellence NICE, 2015. <https://www.nice.org.uk/guidance/ng5> (Accessed  
53 10 Mar 2020).  
54  
55  
56  
57  
58  
59  
60

1  
2  
3 65 World Health Organization. Health 2020: A European policy framework and strategy for  
4 the 21st century. World Health Organization, 2013.

5 [http://www.euro.who.int/\\_\\_data/assets/pdf\\_file/0011/199532/Health2020-Long.pdf?ua=1](http://www.euro.who.int/__data/assets/pdf_file/0011/199532/Health2020-Long.pdf?ua=1)  
6 (Accessed 10 Mar 2020).  
7

8  
9 66 Airaksinen M, Hämeen-Anttila K, Saastamoinen L. Effective use of research data:  
10 Research strategy for rational pharmacotherapy 2018–2022. Reports and memorandums of  
11 the Ministry of Social Affairs and Health, 2018. <http://urn.fi/URN:ISBN:978-952-00-3905-9>  
12 (Accessed 10 Dec 2019).  
13

14  
15 67 United States Pharmacopeia. Medication counselling behavior guidelines. United States  
16 Pharmacopeia, 1997.  
17

18  
19 68 Prime Minister's Office. Finland, a land of solutions – Strategic programme of Prime  
20 Minister Juha Sipilä's Government 29 May 2015. Government Publications, 2015.  
21 [https://vnk.fi/documents/10184/1427398/Ratkaisujen+Suomi\\_EN\\_YHDISTETTY\\_netti.pdf/](https://vnk.fi/documents/10184/1427398/Ratkaisujen+Suomi_EN_YHDISTETTY_netti.pdf/8d2e1a66-e24a-4073-8303-ee3127fbfcac/Ratkaisujen+Suomi_EN_YHDISTETTY_netti.pdf)  
22 [8d2e1a66-e24a-4073-8303-ee3127fbfcac/Ratkaisujen+Suomi\\_EN\\_YHDISTETTY\\_netti.pdf](https://vnk.fi/documents/10184/1427398/Ratkaisujen+Suomi_EN_YHDISTETTY_netti.pdf/8d2e1a66-e24a-4073-8303-ee3127fbfcac/Ratkaisujen+Suomi_EN_YHDISTETTY_netti.pdf)  
23 (Accessed 10 Dec 2019).  
24

25  
26 69 Finnish Government. Programme of Prime Minister Antti Rinne's Government 6 June  
27 2019: inclusive and competent Finland – A socially, economically and ecologically  
28 sustainable society. Publications of the Finnish Government, 2019.  
29 <http://urn.fi/URN:ISBN:978-952-287-760-4> (Accessed 10 Dec 2019).  
30

31  
32 70 Guler S, Hurton, S, winn MC, Molinari M. Levels in decision making and techniques for  
33 clinicians. *International Journal of Digestive Diseases* 2015;1.  
34  
35  
36  
37  
38  
39  
40  
41  
42  
43  
44  
45  
46  
47  
48  
49  
50  
51  
52  
53  
54  
55  
56  
57  
58  
59  
60

## LEGENDS OF THE FIGURES

Fig. 1 Content analysis process applying the Framework Method.<sup>46</sup>

Fig. 2 Categories of themes derived deductively (marked as blue) and inductively (marked as green) from the stakeholders' interviews (n=42, involving 79 interviewees) on well-implemented actions and actions needing development in medication use process for patients with chronic illnesses. (n=a summative of number of the single interviewee's mentions)

Fig. 3 Stakeholders' views on well-implemented actions in medication use process for patients with chronic illnesses. Categories derived deductively are marked as blue (n=7) and categories emerged inductively from the stakeholders' interviews are marked as green (n=3). (n=a summative of number of the single interviewee's mentions, HCP=healthcare professional)

Fig. 4 Stakeholders' views on actions needing development in medication use process for patients with chronic illnesses. Categories derived deductively are marked as blue (n=7) and categories emerged inductively from the stakeholders' interviews are marked as green (n=3). (n=a summative of number of the single interviewee's mentions, HCP=healthcare professional)

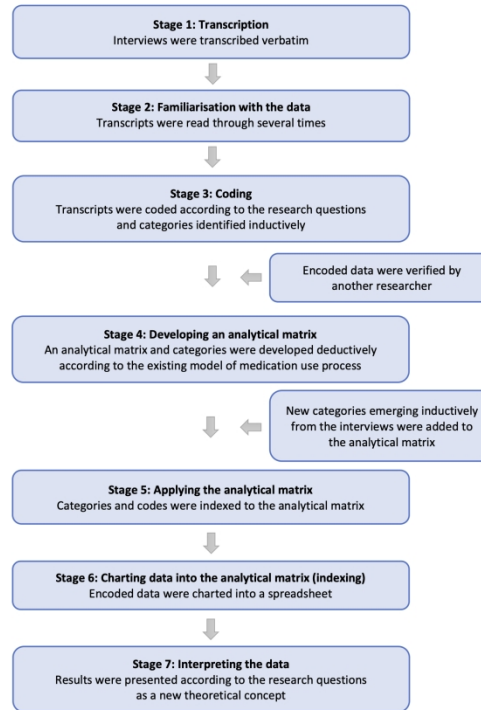

45 Fig. 1 Content analysis process applying the Framework Method.<sup>46</sup>

46 209x297mm (300 x 300 DPI)

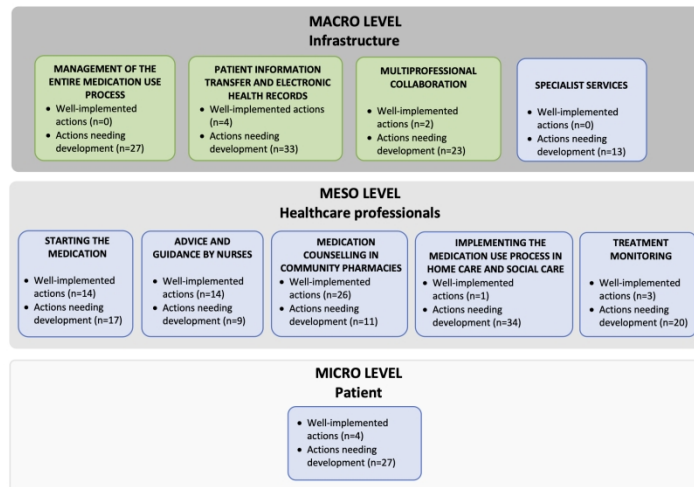

Fig. 2 Categories of themes derived deductively (marked as blue) and inductively (marked as green) from the stakeholders' interviews (n=42, involving 79 interviewees) on well-implemented actions and actions needing development in medication use process for patients with chronic illnesses. (n=a summative of number of the single interviewee's mentions)

209x297mm (300 x 300 DPI)

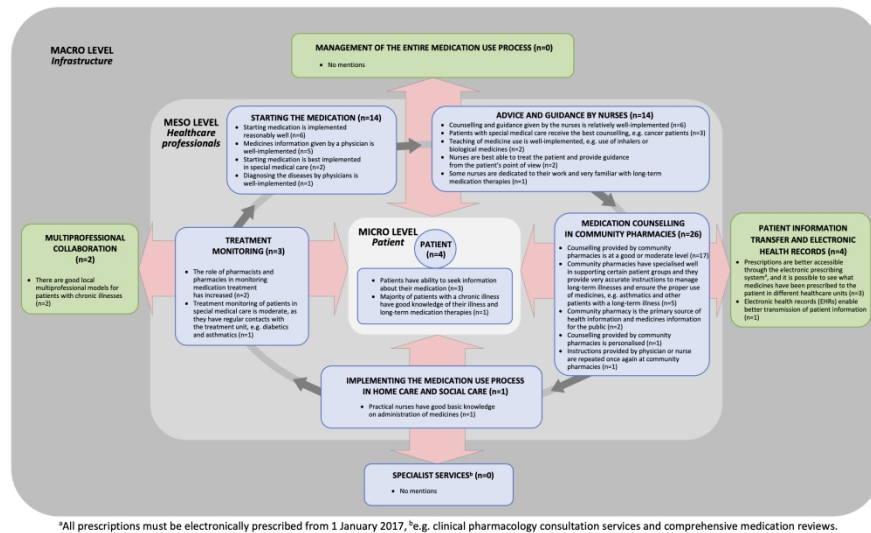

<sup>a</sup>All prescriptions must be electronically prescribed from 1 January 2017, <sup>b</sup>e.g. clinical pharmacology consultation services and comprehensive medication reviews.

Fig. 3 Stakeholders' views on well-implemented actions in medication use process for patients with chronic illnesses. Categories derived deductively are marked as blue (n=7) and categories emerged inductively from the stakeholders' interviews are marked as green (n=3). (n=a summative of number of the single interviewee's mentions, HCP=healthcare professional)

297x209mm (300 x 300 DPI)



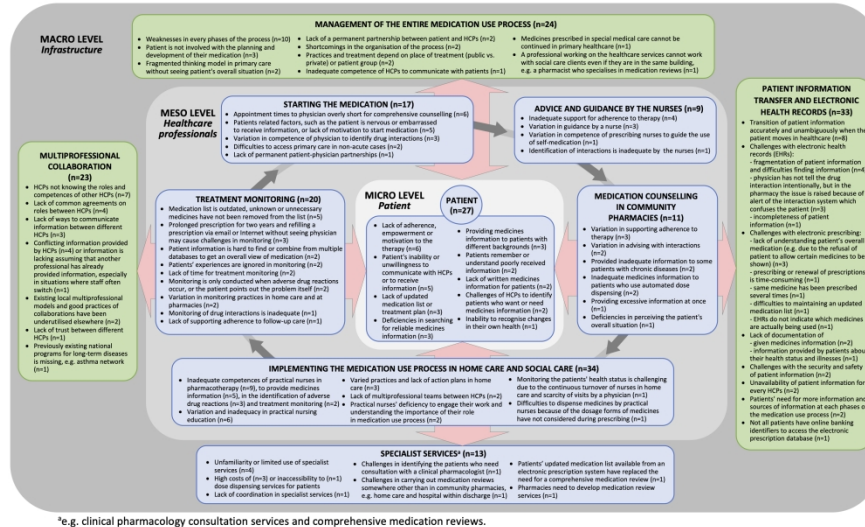

Fig. 4 Stakeholders' views on actions needing development in medication use process for patients with chronic illnesses. Categories derived deductively are marked as blue (n=7) and categories emerged inductively from the stakeholders' interviews are marked as green (n=3). (n=a summative of number of the single interviewee's mentions, HCP=healthcare professional)

297x209mm (300 x 300 DPI)

Appendix A. Evolution and milestones of medicines information to patients in Finland since the 1960s.

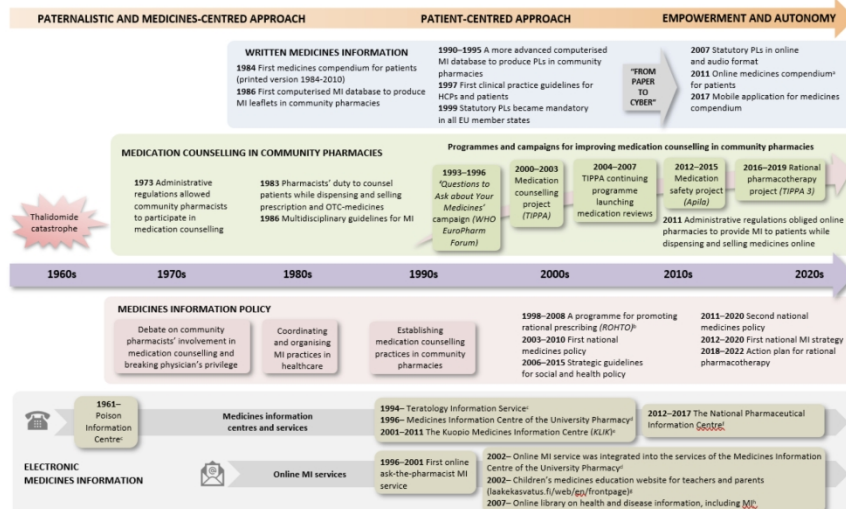

EU-European Union, HCP-healthcare professional, MI-medicines information, OTC-over the counter, PL-package leaflet. †Integrated into the online health library. \*ROHTO initially worked as a project in 1998-2001, and after that it operated as the Centre for Pharmacotherapy Development ROHTO under the Ministry of Social Affairs and Health (2002-2008). †Service provided by the Hospital District of Helsinki and Uusimaa (HUS). ‡Service provided by the University Pharmacy which is owned by University of Helsinki. †Owned by the University of Kuopio/the University of Eastern Finland. †Owned by the University of Eastern Finland and Pharmaceutical Information Centre in 2012-2014, owned by Pharmaceutical Information Centre since 2015, and provided MI service to consumers until 2017. \*Website portal owned by the University of Kuopio/the University of Eastern Finland during 2002-2011, since 2012 owned by the Finnish Medicines Agency Fimea. †Owned by the Finnish Medical Society Duodecim.

297x209mm (300 x 300 DPI)

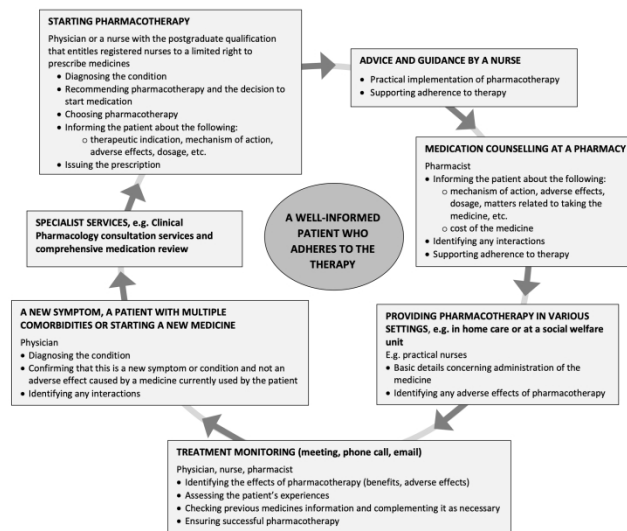

Appendix B. Medicine use process for patients with chronic illnesses as illustrated in the National Medicines Information Strategy (© Fimea 2012).<sup>24</sup>

297x209mm (300 x 300 DPI)

**Appendix C.** Illustrative examples of the expressions (translated from Finnish) mentioned by the interviewees on the well-implemented actions and actions needing development in the medication use process categorised by main categories (n=10) emerged from the interviews. (P=participant of the study)

| MAIN CATEGORIES                                            | WELL-IMPLEMENTED ACTIONS                                                                                                                                                                                                                                                                                                                                                                 | ACTIONS NEEDING DEVELOPMENT                                                                                                                                                                                                                                                                                                                                                                                                                                                                                                                                                                                                                                                                                                                                        |
|------------------------------------------------------------|------------------------------------------------------------------------------------------------------------------------------------------------------------------------------------------------------------------------------------------------------------------------------------------------------------------------------------------------------------------------------------------|--------------------------------------------------------------------------------------------------------------------------------------------------------------------------------------------------------------------------------------------------------------------------------------------------------------------------------------------------------------------------------------------------------------------------------------------------------------------------------------------------------------------------------------------------------------------------------------------------------------------------------------------------------------------------------------------------------------------------------------------------------------------|
| <b>Infrastructure level (macro)</b>                        |                                                                                                                                                                                                                                                                                                                                                                                          |                                                                                                                                                                                                                                                                                                                                                                                                                                                                                                                                                                                                                                                                                                                                                                    |
| Management of the entire medication use process            | No mentions.                                                                                                                                                                                                                                                                                                                                                                             | <p>“Well, it’s not an individual employee, but the entire medication use process should be better organised...”<br/>[representative from the hospital, P72]</p> <p>“And it also happens in primary healthcare, that they do identify a single illness or health problem but do not take account the person as a whole. This represents a fragmented way of thinking.”<br/>[representative from the university, P42]</p>                                                                                                                                                                                                                                                                                                                                            |
| Patient information transfer and electronic health records | <p>“Electronic prescriptions have provided more clarity [to the medication use process ]... via electronic prescription, with both nurses and physician providing patient care, for example for elderly people have a more comprehensive and updated view on patients’ medication than previously. It has been a great improvement...”<br/>[representative from the university, P40]</p> | <p>“Numerous investigations have identified problems, such as lack of critical patient information or incorrect information transfer, in the medication use process. It’s scary. In a way, it pulls the plug out of many things.”<br/>[representative from the scientific society, P66]</p> <p>“Well, I think we should pay attention to how medications are recorded in the electronic health records and how information is safely visible there. That’s catastrophic, that the same medicine may be listed there many times. But instead there is no information on when medication has been started or discontinued. [Medication] lists don’t update themselves, but someone needs to reconcile them.”<br/>[representative from the healthcare center, P9]</p> |
| Multiprofessional collaboration                            | <p>“Excellent local multiprofessional models for cooperation, particularly in long-term patient care, already exist.”<br/>[representative from the national authority, P6]</p>                                                                                                                                                                                                           | <p>“Healthcare professionals should know better the tasks and responsibilities of each other, and, on the other hand, should also be familiar with each other’s knowledge, and what they can and cannot do.”<br/>[representative from the university, P40]</p> <p>“Do we know the skills of different health professionals [participating in the medication use process] well enough and how we could make optimal use of them. On the other hand, can we fully trust other professions.”<br/>[representative from the professional organisation, P18]</p>                                                                                                                                                                                                         |
| Specialist services                                        | No mentions.                                                                                                                                                                                                                                                                                                                                                                             | <p>“Comprehensive medication reviews... big efforts should be made to make the reviews available to patients in need, so that they don’t have to pay for them themselves. This referral policy or some other way, such as the implementation of medication reviews at the pharmacies, is still unrealised.”<br/>[representative from the professional organisation, P23]</p>                                                                                                                                                                                                                                                                                                                                                                                       |

| Healthcare professionals level ( <i>meso</i> )     |                                                                                                                                                                                                                                                                                                                                                                                                                                                                                                                                               |                                                                                                                                                                                                                                                                                                                                                                                                                                                                                                                                                                                                                                                                                                                                                      |
|----------------------------------------------------|-----------------------------------------------------------------------------------------------------------------------------------------------------------------------------------------------------------------------------------------------------------------------------------------------------------------------------------------------------------------------------------------------------------------------------------------------------------------------------------------------------------------------------------------------|------------------------------------------------------------------------------------------------------------------------------------------------------------------------------------------------------------------------------------------------------------------------------------------------------------------------------------------------------------------------------------------------------------------------------------------------------------------------------------------------------------------------------------------------------------------------------------------------------------------------------------------------------------------------------------------------------------------------------------------------------|
| Starting the medication                            | <p>“Starting the medication works rather well at the moment. It is always a physician who diagnoses a disease and counsels the patient how to manage their disease and treatment. Additionally, there is also a nurse commonly involved in counselling. Especially from the perspective of special care, this stage of the medication use process seems to work.”<br/>[representative from the hospital districts, P73]</p> <p>“Starting the medication, I think it works relatively well.”<br/>[representative from the university, P69]</p> | <p>“As a physician, I commonly prescribe medicines. While prescribing, there is often limited time for medication counselling. You just really manage to say that “here is your prescription and inform how patient should take her/his medication.”<br/>[representative from the patient organisation, P71]</p> <p>“Usually, patients are not very responsive to counselling, they may not remember what they have been told during the physician’s visit.<br/>[representative from the professional organisation, P51]</p>                                                                                                                                                                                                                         |
| Advice and guidance by nurses                      | <p>“I do have the belief that while the nurses and midwives have limited prescribing rights, they also have a good knowledge on what to tell patients about medicines.”<br/>[representative from the patient organisation, P56]</p> <p>“And of course, In special medical care, patients will receive the best counselling on their medicines. This concerns for example cancer patients.”<br/>[representative from community pharmacy, P64]</p>                                                                                              | <p>“Advice and guidance given by a nurse varies greatly depending on the resources and indications.”<br/>[representative from the patient organisation, P71]</p> <p>“Nurses should support their patients’ adherence.”<br/>[representative from the professional organisation, P26]</p> <p>“Nurses may not counsel patients much about drug-drug interactions, although it would be really crucial for all patients.”<br/>[representative from the polytechnic, P74]</p>                                                                                                                                                                                                                                                                             |
| Medication counselling in the community pharmacies | <p>“The best knowledge about medicines is really in the community pharmacies.”<br/>[representative from the professional organisation, P50]</p> <p>“The process is best implemented in community pharmacies. There has been a systematic attempt to develop medication counselling for patients with certain diseases, such as asthma and other chronic diseases.”<br/>[representative from the scientific society, P59]</p>                                                                                                                  | <p>“Pharmacists should not give as much information about medicines as they currently do. It is probably because they wish to play safe and explain all the possible adverse drug reactions and all other things. It may result in decreased adherence.”<br/>[representative from the university, P78]</p> <p>“Supporting medication adherence, I do not know, maybe it is supported in some way, but I also think there occurs [among healthcare professionals] some paternalistic ways of thinking. They may consider that there is no need to tell everything. If the physician prescribes and counsels something, the patient should just take his or her medication and follow instructions.”<br/>[representative from the university, P28]</p> |

|                                                                |                                                                      |                                                                                                                                                                                                                                                                                |                                                                                                                                                                                                                                                                                                                                                                                                                                                                                                                                                                                                                                                                                                                                                                                                                 |
|----------------------------------------------------------------|----------------------------------------------------------------------|--------------------------------------------------------------------------------------------------------------------------------------------------------------------------------------------------------------------------------------------------------------------------------|-----------------------------------------------------------------------------------------------------------------------------------------------------------------------------------------------------------------------------------------------------------------------------------------------------------------------------------------------------------------------------------------------------------------------------------------------------------------------------------------------------------------------------------------------------------------------------------------------------------------------------------------------------------------------------------------------------------------------------------------------------------------------------------------------------------------|
| 1<br>2<br>3<br>4<br>5<br>6<br>7<br>8<br>9<br>10<br>11          | Implementing the medication use process in home care and social care | “I would believe and really hope that practical nurses have a good basic knowledge on the administration of medicines.”<br><i>[representative from the university, P76]</i>                                                                                                    | “There is quite a lot of variation in nursing education as I understand it, because the aims of the education are formulated relatively loosely, and it depends on the local possibilities.”<br><i>[representative from the university, P40]</i><br><br>“This medication use process is as strong as its weakest and less educated link, which commonly is a practical nurse or assistant or even an entirely untrained person who medicates patients. It is not certain if they have updated information and knowledge. Either they may not have for example ability to identify adverse drug reactions.”<br><i>[representative from the patient association, P49]</i>                                                                                                                                         |
| 12<br>13<br>14<br>15<br>16<br>17<br>18<br>19<br>20<br>21<br>22 | Treatment monitoring                                                 | “Treatments are well-monitored in relation to chronic medications and chronic illnesses, such as diabetes. Then there is a regular contact with particular physician.”<br><i>[representative from the university, P42]</i>                                                     | It is really a challenge at the moment that the medication lists are not updated... And I think it is especially difficult when patient has multiple medications in use...When you have a lot of medicines which have all been prescribed in different places and by different physician, it seems that there is sometimes no one with the overall idea of the drug load.<br><i>[representative from the pharmacy, P21]</i><br><br>“Treatment monitoring, and especially the identification of potential adverse drug reactions, is perhaps the most challenging part in the medication use process. People do not know when to contact healthcare. It is also unclear how well they [ADR's] are recognised in healthcare. That's the challenge.”<br><i>[representative from the patient organisation, P71]</i> |
| 23                                                             | <b>Patient level (micro)</b>                                         |                                                                                                                                                                                                                                                                                |                                                                                                                                                                                                                                                                                                                                                                                                                                                                                                                                                                                                                                                                                                                                                                                                                 |
| 24<br>25<br>26<br>27<br>28<br>29<br>30<br>31<br>32<br>33<br>34 | Patient                                                              | “Patients with chronic illnesses know a lot about their condition and medications. They also seek information. I'm not worried about the information sources that they use. Certainly, most of them use reliable sources.”<br><i>[representative from the university, P78]</i> | “Patients do not even want to know [about the medicines they use]. This is something that healthcare professionals should recognise. They do not really remember all things that they have been told, and there is not even enough time for medication counselling during the visit with physician. In particular, when they receive a new diagnosis, they can concentrate only on that, and it is fair enough if they remember to take their pill every day, that's enough.”<br><i>[representative from the scientific society, P29]</i><br><br>“It is really difficult to ask questions [from the physician] as patients may not know what to ask. And on the other hand, patients may be afraid that they will ask naive questions...”<br><i>[representative from the university, P76]</i>                   |

# Reporting checklist for qualitative study.

Based on the SRQR guidelines.

## Instructions to authors

Complete this checklist by entering the page numbers from your manuscript where readers will find each of the items listed below.

Your article may not currently address all the items on the checklist. Please modify your text to include the missing information. If you are certain that an item does not apply, please write "n/a" and provide a short explanation.

Upload your completed checklist as an extra file when you submit to a journal.

In your methods section, say that you used the SRQR reporting guidelines, and cite them as:

O'Brien BC, Harris IB, Beckman TJ, Reed DA, Cook DA. Standards for reporting qualitative research: a synthesis of recommendations. Acad Med. 2014;89(9):1245-1251.

|              | Reporting Item                                                                                                                                                                                                                                          | Page Number |
|--------------|---------------------------------------------------------------------------------------------------------------------------------------------------------------------------------------------------------------------------------------------------------|-------------|
| <b>Title</b> |                                                                                                                                                                                                                                                         |             |
|              | <a href="#">#1</a> Concise description of the nature and topic of the study identifying the study as qualitative or indicating the approach (e.g. ethnography, grounded theory) or data collection methods (e.g. interview, focus group) is recommended | 1           |

## Abstract

[#2](#) Summary of the key elements of the study using the abstract format of the intended publication; typically includes background, purpose, methods, results and conclusions

## Introduction

[#3](#) Description and significance of the problem / phenomenon studied: review of relevant theory and empirical work; problem statement

[#4](#) Purpose of the study and specific objectives or question

## Methods

[#5](#) Qualitative approach and research paradigm

Qualitative approach (e.g. ethnography, grounded theory, case study, phenomenology, narrative research) and guiding theory if appropriate; identifying the research paradigm (e.g. postpositivist, constructivist / interpretivist) is also recommended; rationale. The rationale should briefly discuss the justification for choosing that theory, approach, method or technique rather than other options available; the assumptions and limitations implicit in those choices and how those choices influence study conclusions and transferability. As appropriate the



|    |                           |                     |                                                           |          |
|----|---------------------------|---------------------|-----------------------------------------------------------|----------|
| 1  |                           |                     | rationale for several items might be discussed            |          |
| 2  |                           |                     |                                                           |          |
| 3  |                           |                     | together.                                                 |          |
| 4  |                           |                     |                                                           |          |
| 5  |                           |                     |                                                           |          |
| 6  | Researcher                | <a href="#">#6</a>  | Researchers' characteristics that may influence the       | 7        |
| 7  |                           |                     |                                                           |          |
| 8  | characteristics and       |                     | research, including personal attributes, qualifications / |          |
| 9  |                           |                     |                                                           |          |
| 10 | reflexivity               |                     | experience, relationship with participants,               |          |
| 11 |                           |                     |                                                           |          |
| 12 |                           |                     | assumptions and / or presuppositions; potential or        |          |
| 13 |                           |                     |                                                           |          |
| 14 |                           |                     | actual interaction between researchers' characteristics   |          |
| 15 |                           |                     |                                                           |          |
| 16 |                           |                     | and the research questions, approach, methods,            |          |
| 17 |                           |                     |                                                           |          |
| 18 |                           |                     | results and / or transferability                          |          |
| 19 |                           |                     |                                                           |          |
| 20 |                           |                     |                                                           |          |
| 21 |                           |                     |                                                           |          |
| 22 | Context                   | <a href="#">#7</a>  | Setting / site and salient contextual factors; rationale  | 5,6      |
| 23 |                           |                     |                                                           |          |
| 24 |                           |                     |                                                           |          |
| 25 | Sampling strategy         | <a href="#">#8</a>  | How and why research participants, documents, or          | 5,6      |
| 26 |                           |                     |                                                           |          |
| 27 |                           |                     | events were selected; criteria for deciding when no       |          |
| 28 |                           |                     |                                                           |          |
| 29 |                           |                     | further sampling was necessary (e.g. sampling             |          |
| 30 |                           |                     |                                                           |          |
| 31 |                           |                     | saturation); rationale                                    |          |
| 32 |                           |                     |                                                           |          |
| 33 |                           |                     |                                                           |          |
| 34 |                           |                     |                                                           |          |
| 35 | Ethical issues pertaining | <a href="#">#9</a>  | Documentation of approval by an appropriate ethics        | 8        |
| 36 |                           |                     |                                                           |          |
| 37 | to human subjects         |                     | review board and participant consent, or explanation      |          |
| 38 |                           |                     |                                                           |          |
| 39 |                           |                     | for lack thereof; other confidentiality and data security |          |
| 40 |                           |                     |                                                           |          |
| 41 |                           |                     | issues                                                    |          |
| 42 |                           |                     |                                                           |          |
| 43 |                           |                     |                                                           |          |
| 44 |                           |                     |                                                           |          |
| 45 | Data collection methods   | <a href="#">#10</a> | Types of data collected; details of data collection       | 7, Fig.2 |
| 46 |                           |                     |                                                           |          |
| 47 |                           |                     | procedures including (as appropriate) start and stop      |          |
| 48 |                           |                     |                                                           |          |
| 49 |                           |                     | dates of data collection and analysis, iterative          |          |
| 50 |                           |                     |                                                           |          |
| 51 |                           |                     | process, triangulation of sources / methods, and          |          |
| 52 |                           |                     |                                                           |          |
| 53 |                           |                     | modification of procedures in response to evolving        |          |
| 54 |                           |                     |                                                           |          |
| 55 |                           |                     | study findings; rationale                                 |          |
| 56 |                           |                     |                                                           |          |
| 57 |                           |                     |                                                           |          |
| 58 |                           |                     |                                                           |          |
| 59 |                           |                     |                                                           |          |
| 60 |                           |                     |                                                           |          |

|    |                         |                     |                                                          |          |
|----|-------------------------|---------------------|----------------------------------------------------------|----------|
| 1  | Data collection         | <a href="#">#11</a> | Description of instruments (e.g. interview guides,       | 6,7      |
| 2  |                         |                     | questionnaires) and devices (e.g. audio recorders)       |          |
| 3  | instruments and         |                     | used for data collection; if / how the instruments(s)    |          |
| 4  |                         |                     | changed over the course of the study                     |          |
| 5  | technologies            |                     |                                                          |          |
| 6  |                         |                     |                                                          |          |
| 7  |                         |                     |                                                          |          |
| 8  |                         |                     |                                                          |          |
| 9  |                         |                     |                                                          |          |
| 10 |                         |                     |                                                          |          |
| 11 | Units of study          | <a href="#">#12</a> | Number and relevant characteristics of participants,     | 8,       |
| 12 |                         |                     | documents, or events included in the study; level of     |          |
| 13 |                         |                     | participation (could be reported in results)             | Table 1  |
| 14 |                         |                     |                                                          |          |
| 15 |                         |                     |                                                          |          |
| 16 |                         |                     |                                                          |          |
| 17 |                         |                     |                                                          |          |
| 18 |                         |                     |                                                          |          |
| 19 | Data processing         | <a href="#">#13</a> | Methods for processing data prior to and during          | 7, Fig.2 |
| 20 |                         |                     | analysis, including transcription, data entry, data      |          |
| 21 |                         |                     | management and security, verification of data            |          |
| 22 |                         |                     | integrity, data coding, and 4nonymization /              |          |
| 23 |                         |                     | deidentification of excerpts                             |          |
| 24 |                         |                     |                                                          |          |
| 25 |                         |                     |                                                          |          |
| 26 |                         |                     |                                                          |          |
| 27 |                         |                     |                                                          |          |
| 28 |                         |                     |                                                          |          |
| 29 |                         |                     |                                                          |          |
| 30 |                         |                     |                                                          |          |
| 31 | Data analysis           | <a href="#">#14</a> | Process by which inferences, themes, etc. were           | 7, Fig.2 |
| 32 |                         |                     | identified and developed, including the researchers      |          |
| 33 |                         |                     | involved in data analysis; usually references a specific |          |
| 34 |                         |                     | paradigm or approach; rationale                          |          |
| 35 |                         |                     |                                                          |          |
| 36 |                         |                     |                                                          |          |
| 37 |                         |                     |                                                          |          |
| 38 |                         |                     |                                                          |          |
| 39 |                         |                     |                                                          |          |
| 40 |                         |                     |                                                          |          |
| 41 | Techniques to enhance   | <a href="#">#15</a> | Techniques to enhance trustworthiness and credibility    | 7        |
| 42 |                         |                     | of data analysis (e.g. member checking, audit trail,     |          |
| 43 | trustworthiness         |                     | triangulation); rationale                                |          |
| 44 |                         |                     |                                                          |          |
| 45 |                         |                     |                                                          |          |
| 46 |                         |                     |                                                          |          |
| 47 |                         |                     |                                                          |          |
| 48 | <b>Results/findings</b> |                     |                                                          |          |
| 49 |                         |                     |                                                          |          |
| 50 |                         |                     |                                                          |          |
| 51 | Syntheses and           | <a href="#">#16</a> | Main findings (e.g. interpretations, inferences, and     | 8-11     |
| 52 |                         |                     | themes); might include development of a theory or        |          |
| 53 | interpretation          |                     | model, or integration with prior research or theory      |          |
| 54 |                         |                     |                                                          |          |
| 55 |                         |                     |                                                          |          |
| 56 |                         |                     |                                                          |          |
| 57 |                         |                     |                                                          |          |
| 58 |                         |                     |                                                          |          |
| 59 |                         |                     |                                                          |          |
| 60 |                         |                     |                                                          |          |

|    |                         |                     |                                                          |          |
|----|-------------------------|---------------------|----------------------------------------------------------|----------|
| 1  | Links to empirical data | <a href="#">#17</a> | Evidence (e.g. quotes, field notes, text excerpts,       | Appendix |
| 2  |                         |                     | photographs) to substantiate analytic findings           | A        |
| 3  |                         |                     |                                                          |          |
| 4  |                         |                     |                                                          |          |
| 5  |                         |                     |                                                          |          |
| 6  | <b>Discussion</b>       |                     |                                                          |          |
| 7  |                         |                     |                                                          |          |
| 8  |                         |                     |                                                          |          |
| 9  |                         |                     |                                                          |          |
| 10 | Intergration with prior | <a href="#">#18</a> | Short summary of main findings; explanation of how       | 11-13    |
| 11 | work, implications,     |                     | findings and conclusions connect to, support,            |          |
| 12 |                         |                     | elaborate on, or challenge conclusions of earlier        |          |
| 13 | transferability and     |                     | scholarship; discussion of scope of application /        |          |
| 14 |                         |                     | generalizability; identification of unique               |          |
| 15 | contribution(s) to the  |                     | contributions(s) to scholarship in a discipline or field |          |
| 16 |                         |                     |                                                          |          |
| 17 | field                   |                     |                                                          |          |
| 18 |                         |                     |                                                          |          |
| 19 |                         |                     |                                                          |          |
| 20 |                         |                     |                                                          |          |
| 21 |                         |                     |                                                          |          |
| 22 |                         |                     |                                                          |          |
| 23 |                         |                     |                                                          |          |
| 24 | Limitations             | <a href="#">#19</a> | Trustworthiness and limitations of findings              | 13,14    |
| 25 |                         |                     |                                                          |          |
| 26 |                         |                     |                                                          |          |
| 27 | <b>Other</b>            |                     |                                                          |          |
| 28 |                         |                     |                                                          |          |
| 29 |                         |                     |                                                          |          |
| 30 | Conflicts of interest   | <a href="#">#20</a> | Potential sources of influence of perceived influence    | 15       |
| 31 |                         |                     | on study conduct and conclusions; how these were         |          |
| 32 |                         |                     | managed                                                  |          |
| 33 |                         |                     |                                                          |          |
| 34 |                         |                     |                                                          |          |
| 35 |                         |                     |                                                          |          |
| 36 |                         |                     |                                                          |          |
| 37 |                         |                     |                                                          |          |
| 38 | Funding                 | <a href="#">#21</a> | Sources of funding and other support; role of funders    | 15       |
| 39 |                         |                     | in data collection, interpretation and reporting         |          |
| 40 |                         |                     |                                                          |          |
| 41 |                         |                     |                                                          |          |
| 42 |                         |                     |                                                          |          |

None The SRQR checklist is distributed with permission of Wolters Kluwer © 2014 by the Association of American Medical Colleges. This checklist can be completed online using <https://www.goodreports.org/>, a tool made by the [EQUATOR Network](#) in collaboration with [Penelope.ai](#)

# BMJ Open

## How far are we from a medication use process aiming at well-informed adherent patients with long-term medications in Finland? A qualitative study

|                                 |                                                                                                                                                                                                                                                                                                         |
|---------------------------------|---------------------------------------------------------------------------------------------------------------------------------------------------------------------------------------------------------------------------------------------------------------------------------------------------------|
| Journal:                        | <i>BMJ Open</i>                                                                                                                                                                                                                                                                                         |
| Manuscript ID                   | bmjopen-2019-036526.R2                                                                                                                                                                                                                                                                                  |
| Article Type:                   | Original research                                                                                                                                                                                                                                                                                       |
| Date Submitted by the Author:   | 30-Mar-2020                                                                                                                                                                                                                                                                                             |
| Complete List of Authors:       | Mononen, Niina; University of Helsinki, Faculty of Pharmacy, Division of Pharmacology and Pharmacotherapy<br>Pohjanoksa-Mäntylä, Marika ; University of Helsinki<br>Airaksinen, Marja; University of Helsinki<br>Hämeen-Anttila, Katri; Finnish Medicines Agency FIMEA, Assessment of Pharmacotherapies |
| <b>Primary Subject Heading</b>: | Health policy                                                                                                                                                                                                                                                                                           |
| Secondary Subject Heading:      | Health informatics, Qualitative research                                                                                                                                                                                                                                                                |
| Keywords:                       | Health policy < HEALTH SERVICES ADMINISTRATION & MANAGEMENT, Organisation of health services < HEALTH SERVICES ADMINISTRATION & MANAGEMENT, PUBLIC HEALTH, QUALITATIVE RESEARCH, HEALTH SERVICES ADMINISTRATION & MANAGEMENT                                                                            |
|                                 |                                                                                                                                                                                                                                                                                                         |

SCHOLARONE™  
Manuscripts



I, the Submitting Author has the right to grant and does grant on behalf of all authors of the Work (as defined in the below author licence), an exclusive licence and/or a non-exclusive licence for contributions from authors who are: i) UK Crown employees; ii) where BMJ has agreed a CC-BY licence shall apply, and/or iii) in accordance with the terms applicable for US Federal Government officers or employees acting as part of their official duties; on a worldwide, perpetual, irrevocable, royalty-free basis to BMJ Publishing Group Ltd ("BMJ") its licensees and where the relevant Journal is co-owned by BMJ to the co-owners of the Journal, to publish the Work in this journal and any other BMJ products and to exploit all rights, as set out in our [licence](#).

The Submitting Author accepts and understands that any supply made under these terms is made by BMJ to the Submitting Author unless you are acting as an employee on behalf of your employer or a postgraduate student of an affiliated institution which is paying any applicable article publishing charge ("APC") for Open Access articles. Where the Submitting Author wishes to make the Work available on an Open Access basis (and intends to pay the relevant APC), the terms of reuse of such Open Access shall be governed by a Creative Commons licence – details of these licences and which [Creative Commons](#) licence will apply to this Work are set out in our licence referred to above.

Other than as permitted in any relevant BMJ Author's Self Archiving Policies, I confirm this Work has not been accepted for publication elsewhere, is not being considered for publication elsewhere and does not duplicate material already published. I confirm all authors consent to publication of this Work and authorise the granting of this licence.

|                                             |                                                                                                                                                                                                                                                                                                                                                                                                                                                                                                     |
|---------------------------------------------|-----------------------------------------------------------------------------------------------------------------------------------------------------------------------------------------------------------------------------------------------------------------------------------------------------------------------------------------------------------------------------------------------------------------------------------------------------------------------------------------------------|
| <b>Title</b>                                | <b>How far are we from a medication use process aiming at well-informed adherent patients with long-term medications in Finland? A qualitative study</b>                                                                                                                                                                                                                                                                                                                                            |
| <b>Authors' names</b>                       | Niina Mononen, Marika Pohjanoksa-Mäntylä, Marja Airaksinen, Katri Hämeen-Anttila                                                                                                                                                                                                                                                                                                                                                                                                                    |
| <b>Address and position for each author</b> | <p>Niina Mononen, PhD, Postdoctoral Researcher<br/> Marika Pohjanoksa-Mäntylä, PhD, University Lecturer<br/> Marja Airaksinen, Professor, PhD</p> <p>Clinical Pharmacy Group, Division of Pharmacology and Pharmacotherapy, Faculty of Pharmacy, University of Helsinki, 00014 University of Helsinki, Finland</p> <hr/> <p>Katri Hämeen-Anttila, PhD, Research and Development Manager<br/> Assessment of Pharmacotherapies, Finnish Medicines Agency Fimea, P.O. Box 55, 00034 FIMEA, Finland</p> |
| <b>Corresponding author</b>                 | <p>Niina Mononen</p> <p>Clinical Pharmacy Group, Division of Pharmacology and Pharmacotherapy, Faculty of Pharmacy, University of Helsinki, 00014 University of Helsinki, Finland<br/> E-mail: niina.mononen@helsinki.fi<br/> Telephone: +358 (0) 2941 59917</p>                                                                                                                                                                                                                                    |

**Word count:** 4318

**Keywords:** health policy, health services administration & management, organisation of health services, public health, qualitative research

## ABSTRACT

### Objective

Finland is one of the few countries that has established a national medicines information (MI) Strategy. The ultimate goal of the Strategy is a well-implemented medication use process resulting in well-informed adherent patients. This study aimed at evaluating the implementation of the Strategy three years after its launch.

### Design

The evaluation applied pragmatic approach and was conducted by interviewing stakeholders involved in the National MI Network enhancing the MI Strategy's implementation. The Network comprises national key stakeholders producing and using MI. Data were deductively analysed according to the medication use process of the MI Strategy using the Framework Method, complemented with inductively derived categories.

### Setting

National implementation of the MI Strategy throughout the healthcare system after the first operational period (2012–2014) in 2015.

### Participants

The members of the National MI Network (n=79/111, participation rate 71%, representing 42/53 stakeholder organisations).

### Outcome measures

A new conceptual framework was developed based on stakeholders' views on well-implemented actions and actions needing development in the medication use process at: 1) infrastructure (*macro*), 2) healthcare professionals (*meso*), and 3) patient (*micro*) levels.

### Results

Medication counselling by community pharmacists was the primary implemented action, followed by physicians' actions while starting a new medication, and advice given by nurses. The major development needs concerned: 1) poor access to patient information and its transfer in healthcare, particularly the lack of reconciled medication lists and electronic health records (*macro*); 2) poorly functioning medication use process in home care and social care units, such as nursing homes (*meso*); and 3) limited patient involvement in their care (*micro*).

### Conclusions

Far more actions for development than well-established practices in the medication use process were identified. Major challenges found in this evaluation are considered in the ongoing Rational Pharmacotherapy Action Plan 2018–2022 by the Ministry of Social Affairs and Health.

## STRENGTHS AND LIMITATIONS OF THIS STUDY

- A wide range of stakeholders provided their reflections of the achievement of the ultimate goal of the national MI Strategy three years after its launch.
- A majority of the stakeholder representatives were healthcare professionals, half of them being pharmacists which may have skewed the results.
- Absence of real patients with chronic illnesses and medications may distort results.
- The dynamics of the interviews may have been influenced by the fact that they were conducted as individual, pair or group interviews according to convenience of each stakeholder.
- In the conceptual model building, the breakdown of the data to macro, meso and micro levels assisted in constructing a holistic understanding of the medication use process and its development needs.



## INTRODUCTION

Carrying out long-term medication is a collaborative process whereby the ultimate goal is well-informed patients who have the capability, and motivation to, self-manage their medications. Team-based and patient-centred care emphasises the roles and tasks of each healthcare provider involved in the care process to ensure medication use in a high-quality, safe, effective, economical and rational manner.<sup>1</sup> Part of this collaborative team should be the patients themselves so that they can take responsibility for their own care and become empowered for self-management and self-care.<sup>2</sup> Although all healthcare professionals involved in the medication use process should have clearly determined responsibilities and tasks, there still exists ambiguity in this respect.<sup>3-5</sup> Among healthcare professionals there is uncertainty about their own roles and tasks, as well as those of other professionals.<sup>6-8</sup> If the roles and tasks are not agreed upon, it can lead to preventable risk situations, medication errors or omissions.<sup>3,9-11</sup> It can also lead to a preventable increase in the medication-related burden for patients and impair their lived experience with the medication,<sup>12</sup> e.g., through inadequate support from the social and health service system at different phases of a long-term journey with a chronic illness.<sup>13,14</sup>

Easy access to reliable and timely health and medicines information (MI) is an integral part of the successful medication use process for both healthcare providers and medicine users.<sup>15-21</sup> This is a strategic issue which has been recognised by, for instance, the European Commission.<sup>16,22</sup> Finland is one of the few countries that has actually established a long-term strategic development plan for enhancing coordination between national key stakeholders involved in producing and using MI.<sup>17,23-25</sup> In Finland, MI practices have been actively developed since the 1980s, especially in community pharmacies (Appendix A).<sup>26-30</sup> Patients have a statutory right to receive information about their medicines from their healthcare providers, with physicians and pharmacists being mandated to counsel on safe and appropriate medicine use while prescribing and dispensing.<sup>31,32</sup> The current national medicines policy (2011–2020) prioritises the development of MI practices, particularly to improve coordination between MI providers and to enhance the use of MI sources in patient care.<sup>23</sup> To implement these medicines policy actions, the Finnish Medicines Agency Fimea launched a national MI Strategy “Rational Use of Medicines through Information and Guidance” in 2012 with the ultimate goal of a well-implemented medication use process that will result in well-informed and adherent patients by 2020.<sup>24,25</sup> The special emphasis of the MI Strategy is on patients with

1  
2  
3 long-term medications. Although stakeholders play a key role in the implementation of MI  
4 strategies, the implementation has not previously been evaluated from their perspective.<sup>17</sup> The  
5 aim of this study was to evaluate the implementation of the MI Strategy in Finland from the  
6 stakeholders' perspective.  
7  
8  
9

## 10 11 **METHODS**

### 12 13 **Key content of the MI Strategy**

14  
15  
16  
17  
18  
19 The national MI Strategy was established by Fimea which also coordinates its  
20 implementation.<sup>24,25</sup> The MI Strategy builds on the European Commission recommendations  
21 on MI to patients.<sup>16</sup> The situation in other European Union (EU) countries was investigated  
22 by conducting an inventory of MI strategies in the EU countries in 2009.<sup>33</sup> As the UK was  
23 found to have the most advanced and systematic MI practices within EU, their MI Strategy  
24 “Better Information, Better Choices, Better Health” was analysed in greater detail.<sup>34,35</sup> To  
25 understand MI practices in Finland, an inventory of the MI research conducted in Finland  
26 since 2000 was carried out to identify strengths and development needs in MI.<sup>28,36</sup> In addition,  
27 potential stakeholders to be involved in the national MI Strategy's implementation were  
28 interviewed to identify their views on strategic core contents and proposals for actions.<sup>25</sup>  
29  
30  
31  
32  
33  
34  
35  
36

37  
38 The ultimate goal of the national MI Strategy was influenced by the Chronic Care Model,<sup>37,38</sup>  
39 which was quite extensively piloted in Finland in the beginning of the 2010s (i.e. at the time  
40 the MI Strategy was established) as a potential basis for a new social and health services  
41 system.<sup>39</sup> The model puts the patient at the centre and encourages the creation of structures  
42 and processes that support self-management of chronic diseases. The model is applicable  
43 to MI as there is a wealth of evidence, both globally and from Finland, that patients do not  
44 receive adequate support to self-manage their medication,<sup>21,40-43</sup> and adherence to treatment is  
45 still an unresolved issue.<sup>2,44-49</sup>  
46  
47  
48  
49  
50  
51  
52

53  
54 Appendix B shows the modifications of the Chronic Care model used in the national MI  
55 Strategy. A key process for patients with long-term medications is the medication use process  
56 illustrated in Appendix B. The medication use process covers activities for the needs  
57 assessment for medication, selection of the medication and prescribing, dispensing, dosing  
58 and administration, patient motivation and counselling to support adherence and self-  
59  
60

1  
2  
3 management, treatment follow-up and assessment of outcomes.<sup>24</sup> The patient-specific  
4 medication plan is an important part of the medication use process which facilitates  
5 implementation of the medication and communication on it between the patient and  
6 participating healthcare providers and organisations. This “patient at the centre” model is also  
7 in line with the pharmaceutical care process introduced by the landmark article of Hepler and  
8 Strand in 1990.<sup>50</sup>  
9  
10  
11  
12  
13  
14

15 The national MI Strategy has 6 main goals and 37 proposals for actions.<sup>24</sup> Its implementation  
16 is divided into three operational periods (years 2012–2014; 2015–2017; and 2018–2020). The  
17 MI Strategy aims to 1) influence the quality, availability and utilisation of MI targeted to  
18 consumers and healthcare professionals, 2) enhance professionals’ MI training and  
19 competences, and 3) focus MI research to guide strategy work. Four working groups and their  
20 coordination group, i.e., National MI Network, form the primary resource for MI Strategy’s  
21 implementation (see Table 1).<sup>24,25</sup>  
22  
23  
24  
25  
26  
27  
28

### 29 **Study design and setting**

30  
31  
32 The medicine use process with the patient at the centre (Appendix B) was chosen as a target  
33 of the national MI Strategy’s evaluation. The study applied a pragmatic approach and the  
34 evaluation was based on the reflections of the members of the National MI Network. A  
35 qualitative cross-sectional design with semi-structured interviews among the members of the  
36 MI Network was used. The interviews were performed after the first three-year operational  
37 period (2012–2014) of the national MI Strategy in 2015. During this operational period, the  
38 MI Network had 111 members representing 53 stakeholder organisations. First, an invitation  
39 to participate in the interview was sent to all members of the MI Network via email. Following  
40 this, a more detailed information letter was sent to those who agreed to participate in the study.  
41  
42  
43  
44  
45  
46  
47  
48  
49

### 50 **Interview guide**

51  
52  
53 A semi-structured interview guide with two main themes and eight sub-themes focusing on  
54 the goals and actions of the national MI Strategy was developed.<sup>24</sup> The interview guide was  
55 pre-tested in two pilot interviews with six participants. No significant changes were made  
56 based on the pilot, and therefore, the data from the pilots were included in the study. The two  
57 main themes discussed in the interviews pertained to: 1) reaching the goals and implementing  
58  
59  
60

1  
2  
3 the actions of the MI Strategy, and 2) actions taken by the National MI Network. This study  
4 focused on the first main theme and the following questions in the interview guide: “If you  
5 consider the figure of medication use process for a patient with chronic diseases, then: 1) what  
6 are the most crucial actions that have been implemented, and 2) what actions should be  
7 focused upon in the future in order to achieve the goal of a well-informed, adherent patient or  
8 medicine user?” The figure of the medication use process as illustrated in the MI Strategy was  
9 shown to the participants to stimulate discussion during the interview (Appendix B).<sup>24</sup>  
10  
11  
12  
13  
14  
15  
16

## 17 **Data collection**

18  
19  
20 Interviews were conducted as individual, pair and group interviews depending on the  
21 individual preference of each stakeholder in 2015. The aim was to have only one stakeholder  
22 organisation in each interview. Due to the geographical location and schedules of the  
23 participants, interviews were conducted face-to-face, by telephone or via video conferencing.  
24 One moderator NM (female pharmacist, MSc, with training in qualitative interviews)  
25 facilitated and audiotaped all interviews with permission from the participants.  
26  
27  
28  
29  
30  
31

## 32 **Analysis**

33  
34  
35 Data were analysed by applying the Framework Method, which utilises both deductive and  
36 inductive content analysis (Fig. 1).<sup>51</sup> The analysis was carried out in stages using Microsoft  
37 Word and Excel (Windows 10 Home). The interviews were transcribed verbatim by a  
38 company specialised in converting to written text qualitative research data (*Stage 1*). Each  
39 transcript was repeatedly read by one researcher (NM), while listening to the audiotapes  
40 (*Stage 2*). Single words, sentences or groups of sentences related to study questions were  
41 coded by one researcher (NM) and verified by another researcher (MPM) (*Stage 3*). Any  
42 differences in interpretation were discussed with the research group and consensus was  
43 received. Once the key categories were identified inductively, the transcripts were purposively  
44 read to detect any discussion that deviated from these categories and an analytical matrix was  
45 developed (*Stage 4*). Main and sub-categories were primarily developed deductively  
46 according to the medication use process previously published in the national MI Strategy  
47 (Appendix B)<sup>24</sup> (*Stage 5*). Additionally, new main and sub-categories were inductively  
48 derived from the interview data. Codes were classified into main categories, and the encoded  
49 data were charted into a spreadsheet generated from the analytical matrix (*Stage 6*). Based on  
50  
51  
52  
53  
54  
55  
56  
57  
58  
59  
60

1  
2  
3 the existing medication use process model (Appendix B), and complemented with  
4 participants' views identified from the interviews, a new conceptual framework of the  
5 medication use process was developed (*Stage 7*). The results are presented in accordance with  
6 two main research questions, i.e., stakeholders' views on: 1) the well-implemented actions,  
7 and 2) the actions needing development in the medication use process. The results are  
8 classified into three operational levels: infrastructure (*macro*), healthcare professional (*meso*)  
9 and patient (*micro*) level. This follows the conceptual framework applied to combine the  
10 functions of primary care with the dimensions of integrated care.<sup>52</sup> Numbers of encodings  
11 were counted according to the mentions by each participant and the summative numbers were  
12 set into the operational levels. The standards for reporting qualitative research (SRQR) was  
13 utilised when applicable.<sup>53</sup>

24 Add figure 1 in here.

### 27 **Ensuring rigor of the analysis**

30 In the conceptual model building, breakdown of the data to *macro*, *meso* and *micro* levels was  
31 used.<sup>52</sup> *Trustworthiness* of the analysis process was confirmed in every phase, including data  
32 preparation (e.g., verbatim transcripts), management of data (e.g., software was used in data  
33 coding) and reporting of results (e.g., a single coder with a reviewer).<sup>54,55</sup> To ensure the  
34 *credibility*, a previously known model of a medication use process<sup>24</sup> was used as an analysis  
35 matrix, supplemented with the main and sub-categories identified inductively from the data.  
36 Additionally, a theoretical method previously used in healthcare research<sup>51</sup> was applied in  
37 analysing data to strengthen *credibility*. To increase the *comprehensivity* of the study, two  
38 researchers – and when necessary the whole research group – were involved in the data  
39 analysis process. The content and structure of concepts created by content analysis were  
40 illustrated with the examples of quotations from various participants to indicate  
41 *conformability* and *objectivity*. Quotations have been selected to represent the identified main  
42 and sub-categories in the new conceptual framework developed for the medication use  
43 process.

## Research ethics

The study was conducted according to good scientific practice, following the guidelines of the Finnish Advisory Board on Research Integrity.<sup>56</sup> According to the guidelines, the study was deemed to be exempt from requiring approval from the research ethics committee. The research plan was approved by the National MI Network before starting the data collection. Prior to the interviews, participants were informed in writing about the study and that the interviews will be tape-recorded. At the beginning of each interview they were asked to give informed consent. Participation was voluntary with the opportunity to withdraw from the study at any time. The recordings and interview notes were digitally stored and encrypted with a password. All data were anonymised and were accessible only to the authors. Privacy and confidentiality of the individuals participating in the study were ensured throughout the entire research project.

## Patient and public involvement

Patient participation was taken into account by interviewing representatives from various national patient organisations who were active partners in the National MI Network. There was no real patients or public involvement in the planning phase or design of the study. The results of the study will be discussed in the MI Network for further actions of the national MI Strategy that will be extended to a new term lasting until 2026.

## RESULTS

In total, 79 out of 111 members of the National MI Network participated in the study (participation rate 71%) representing 42 out of 53 stakeholders (Table 1). Females represented 77% (n=61) of participants. Interviews (n=43) were conducted as individual (n=22), pair (n=11) or group interviews (n=10), either face-to-face (79%, n=34), by telephone (12%, n=5), as video conferencing (7%, n=3) or as face-to-face and video conferencing (2%, n=1). Altogether, 3–6 participants attended the group interviews at a time. Four interviews included participants from more than one stakeholder organisation. A majority of the participants were pharmacists (43% of all participants, n=34), physicians (22%, n=17) and nurses (15%, n=12). Educational units were the most commonly represented stakeholder group (24% of the

stakeholder organisations, n=10), including universities, polytechnics, vocational institutions and continuing education units.

**Table 1** Characteristics of the individual stakeholder representatives (n=79) and the stakeholder organisations (n=42) participating in the study. (n=number of individual stakeholder representatives or stakeholder organisations)

| Stakeholders by profession                                                                                        | Individual stakeholder representatives who participated in the study |      | Individual stakeholder representatives in the MI Network <sup>a</sup> |      |
|-------------------------------------------------------------------------------------------------------------------|----------------------------------------------------------------------|------|-----------------------------------------------------------------------|------|
|                                                                                                                   | n                                                                    | %    | n                                                                     | %    |
| Pharmacists                                                                                                       | 34                                                                   | 43.0 | 41                                                                    | 36.9 |
| Physicians                                                                                                        | 17                                                                   | 21.5 | 22                                                                    | 19.8 |
| Nurses                                                                                                            | 12                                                                   | 15.2 | 15                                                                    | 13.5 |
| Others                                                                                                            | 11                                                                   | 13.9 | 21                                                                    | 18.9 |
| Practical nurses                                                                                                  | 2                                                                    | 2.5  | 2                                                                     | 1.8  |
| Healthcare students                                                                                               | 1 <sup>b</sup>                                                       | 1.3  | 4 <sup>b-e</sup>                                                      | 3.6  |
| Dentists                                                                                                          | 0                                                                    | 0    | 1                                                                     | 0.9  |
| Not known                                                                                                         | 2                                                                    | 2.5  | 5                                                                     | 4.5  |
| Altogether                                                                                                        | 79                                                                   |      | 111                                                                   |      |
| Stakeholders by type of affiliation                                                                               | Stakeholder organisations that participated in the study             |      | Stakeholder organisations represented in the MI Network <sup>a</sup>  |      |
|                                                                                                                   | n                                                                    | %    | n                                                                     | %    |
| Healthcare centers, hospitals and hospital districts, hospital pharmacies and dispensaries, university pharmacies | 8                                                                    | 19.0 | 8                                                                     | 15.1 |
| Patient associations and organisations                                                                            | 8                                                                    | 19.0 | 10                                                                    | 18.9 |
| Professional organisations                                                                                        | 7 <sup>b,d,e</sup>                                                   | 16.7 | 8 <sup>b-e</sup>                                                      | 15.1 |
| Universities                                                                                                      | 6 <sup>b,d,e</sup>                                                   | 14.3 | 6 <sup>b,d,e</sup>                                                    | 11.3 |
| Scientific societies                                                                                              | 4 <sup>b,d,f,g</sup>                                                 | 9.5  | 5 <sup>b,d,f,g</sup>                                                  | 9.4  |
| Polytechnics, vocational institutions                                                                             | 3 <sup>e,h</sup>                                                     | 7.1  | 5 <sup>e,h</sup>                                                      | 9.4  |
| National authorities                                                                                              | 2                                                                    | 4.8  | 3                                                                     | 5.7  |
| Organisations representing pharmaceutical industry                                                                | 2                                                                    | 4.8  | 2                                                                     | 3.8  |
| Continuing education units                                                                                        | 1 <sup>b</sup>                                                       | 2.4  | 1 <sup>b</sup>                                                        | 1.9  |
| Student associations                                                                                              | 1 <sup>b</sup>                                                       | 2.4  | 4 <sup>b-e</sup>                                                      | 7.5  |
| Others                                                                                                            | 0                                                                    | 0    | 1                                                                     | 1.9  |
| Altogether                                                                                                        | 42                                                                   |      | 53                                                                    |      |

<sup>a</sup>National Medicines Information (MI) Network, <sup>b</sup>pharmacy, <sup>c</sup>dentistry, <sup>d</sup>medicine, <sup>e</sup>nursing, <sup>f</sup>clinical pharmacology, <sup>g</sup>psychiatry, <sup>h</sup>practical nursing.

### Well-implemented actions in the medication use process

The new conceptual framework illustrating well-implemented actions in the medication use process consisted of ten main categories of actions (Fig. 2 and 3). Of these, seven were derived deductively from the previous medication use process model (Appendix B) and three were inductively derived from the data (Fig. 3). All the inductively derived categories were at the infrastructure (*macro*) level. Around half of the participants (52%) reported well-implemented actions, mostly at the meso level (i.e., healthcare professionals). Of these actions, medication counselling by community pharmacists was considered the best implemented (n=26

1  
2  
3 mentions), followed by physicians' performance while starting a medication (n=14), and  
4 advice and guidance provided by nurses (n=14) (Appendix C).  
5  
6  
7

8 Add figure 2 in here.  
9

10  
11 Add figure 3 in here.  
12  
13

14  
15 Very few mentions of the well-implemented actions at the infrastructure (*macro*) level were  
16 present (Fig. 3). These related to the patient information transfer and electronic health records  
17 (EHRs) (n=4 mentions of being well-implemented) and multiprofessional collaboration (n=2),  
18 while none of the stakeholders mentioned management of the entire medication use process  
19 (n=0) or specialist services (n=0) as well-implemented.  
20  
21  
22  
23  
24

### 25 **Actions needing development in the medication use process**

26  
27

28  
29 The stakeholders mentioned far more actions for development than well-established practices  
30 in the medication use process (211 vs. 68 mentions, respectively) (Fig. 2, 3 and 4). Almost all  
31 participants (94%) raised at least one area for improvement (Fig. 2 and 4, Appendix C). The  
32 highest number of mentions indicating a need for development concerned medication use  
33 process in home care and social care (*meso*) (n=34), patient information transfer and EHRs,  
34 including reconciled medication lists (*macro*) (n=33), and patients' management with the  
35 medication (*micro*) (n=27). At the infrastructure (*macro*) level, management of the entire  
36 medication use process (n=24) and multiprofessional collaboration (n=23) were also  
37 frequently mentioned as areas for development.  
38  
39  
40  
41  
42  
43  
44  
45

46 Add figure 4 in here.  
47  
48

49  
50 In the medication use process in home care and social care units, such as nursing homes, most  
51 of the concerns related to skills, competences and inadequate training of practical nurses to  
52 appropriately manage the medications of their older clients (Fig. 4). A need for additional  
53 training in pharmacotherapy was raised, particularly for home care and nursing home staff to  
54 meet the requirements of their current work duties in geriatric care. Inadequate patient  
55 information transfer between care units and limited availability of EHRs in the medication use  
56 process were among the major concerns as not all professionals involved in the care team have  
57  
58  
59  
60



1  
2  
3 access to complete and accurate patient information, such as laboratory results, or when the  
4 patient is transferred from a care unit to another. In addition, many stakeholders reported that  
5 the management of the entire medication use process needed development indicating  
6 fragmentation, lack of coordination and poor collaboration between different healthcare  
7 professionals and between professionals and patients. They also expressed concerns on  
8 treatment monitoring as it was not commonly conducted very systematically.  
9  
10  
11  
12  
13  
14

15 Finally, poor patient involvement during the entire medication use process was a concern  
16 reflecting a lack of motivation or adherence to treatment and an inability or unwillingness to  
17 communicate with healthcare professionals (Fig. 4). A further concern was that patients do  
18 not always have reconciled medication lists or treatment plans, which may not only challenge  
19 healthcare professionals at the point of prescribing and dispensing medicines, but also patients  
20 while using medicines at home. Additionally, patients' limited skills in searching reliable  
21 health and MI and insufficient medication counselling for particular patient groups, such as  
22 the deaf, people with vision impairment and using multiple medications, were identified as  
23 areas needing attention.  
24  
25  
26  
27  
28  
29  
30  
31

## 32 **DISCUSSION**

33  
34  
35  
36 This study revealed that the medication use process of chronically ill patients using long-term  
37 medications requires development at every level of implementation. The major development  
38 needs in the infrastructure concern the coordination and management of care, transfer of  
39 patient information between care units, availability of a reconciled medication list, and local  
40 and national agreements on the responsibilities of patients and professionals involved in the  
41 medication use process. The most urgent development needs at the professional level focus  
42 on the entire medication use process in primary and social care, particularly in geriatric units  
43 where practical nurses' competences do not meet their actual work responsibilities. The  
44 current medication use process lacks genuine patient-centeredness, manifested by a lack of  
45 adherence, motivation and communication, and the inability of patients to retrieve  
46 information. Patients on long-term medications need to be better involved in implementing  
47 their treatment by improving empowerment and partnership, and by finding new ways to  
48 support self-management and treatment commitment.  
49  
50  
51  
52  
53  
54  
55  
56  
57  
58  
59  
60

1  
2  
3 According to the stakeholders, challenges in implementing the medication use process appear  
4 to be the greatest in primary care, especially in home care and social care units such as in  
5 nursing homes. This means social and healthcare units providing care for older adults in the  
6 poorest health conditions. The result may reflect that the Finnish population is aging rapidly  
7 and the care system has not been adequately prepared for the growing need to, for example,  
8 train care personnel in geriatric pharmacotherapy to safely manage the medications. This is  
9 particularly the case for practical nurses whose the responsibility for medication management  
10 in geriatric care units has increased remarkably even though their pharmacotherapy training  
11 is limited. Practical nurses have three-year vocational education that focuses on supportive  
12 and technical nursing, and, thus, they may not have adequate competence to take responsibility  
13 for medication. This finding is in line with previous studies showing that nursing personnel  
14 (e.g., practical nurses) working in home care and social welfare units may also lack  
15 pharmacotherapy knowledge and skills in providing MI.<sup>28,57-60</sup> The same trend and challenges  
16 have been found in other research and development programmes in Finland and other  
17 countries.<sup>57,58</sup> The challenge of safe management of medications and polypharmacy of older  
18 adults has been prioritised globally in the ongoing WHO Global Patient Safety Program  
19 “Medication Without Harm”.<sup>61</sup> Further research should focus on geriatric care units in primary  
20 and social care to better understand the systems-based root causes and contributing factors of  
21 actual and potential risks in the current medication use processes.  
22  
23  
24  
25  
26  
27  
28  
29  
30  
31  
32  
33  
34  
35  
36

37 Despite the pharmaceutical policy initiatives and wide recognition internationally of the  
38 importance of patient empowerment and involvement in healthcare,<sup>2,61</sup> our study reflects that  
39 it might not be actualised in the best possible way. It is worth remembering that the majority  
40 of the interviewees in this study were health professionals, even in cases they represented the  
41 voice of patients. Thus, the results are skewed to a professional opinion even in the patient  
42 perspective. Nevertheless, the results send a clear message that patients’ involvement in their  
43 long-term medication should be significantly increased. To be successful, research and actions  
44 should focus on a patient approach in the implementation of long-term medications. Only the  
45 patients themselves can describe the issues that matter to them, affecting their motivation for  
46 treatment, success of self-management and empowerment. Future studies should focus on real  
47 patients to explore their perceptions and experiences.  
48  
49  
50  
51  
52  
53  
54  
55  
56  
57  
58  
59  
60

1  
2  
3 In this study, the stakeholders reported that patients are not often willing to discuss their  
4 medications and medication-related problems. This may reflect their preferences, or capacity  
5 for participation, or uncertainty about the responsibilities and tasks of patients' and different  
6 healthcare professionals in the medication use process. A communicative relationship  
7 between healthcare professionals and patients is an essential driver for patient involvement in  
8 the medication use process, and for motivation for self-management and empowerment with  
9 medication use, especially for those with long-term medications.<sup>37,38,50,62-64</sup> Healthcare  
10 professionals should encourage patients to share experiences and concerns about their  
11 treatment. They also need to ensure access to MI throughout the process. Although the number  
12 of MI sources available for patients has increased, people might not always receive MI from  
13 any sources.<sup>16,17,22</sup> In Finland, the proportion of patients who report not receiving information  
14 on medicines they use from any healthcare professional has more than doubled between 1999  
15 and 2014.<sup>21</sup> Actions are needed to ensure equal access of MI for all patients and throughout  
16 the medication use process to support self-management and empowerment.  
17  
18  
19  
20  
21  
22  
23  
24  
25  
26  
27  
28

29 Infrastructural factors leading to poor access to patient and MI and poor adherence, such as a  
30 lack of reconciled medication lists and treatment plans, and lack of personal communication  
31 with care providers should be further investigated from a patient perspective.<sup>13,65</sup> In particular,  
32 a reconciled medication list is essential for professionals and patients. For example, guidelines  
33 for patient-centred therapeutic counselling assume that the practitioner should review  
34 available patient information before the encounter and use the information gathered to  
35 determine what to discuss and agree on the treatment with the medicine user.<sup>28,30,66</sup>  
36  
37  
38  
39  
40  
41  
42

43 Since this evaluation was conducted in 2015, shortcomings found in the infrastructure of the  
44 medication use process related to the coordination and availability of electronic health records  
45 have been recognised in the ongoing Rational Pharmacotherapy Action Plan 2022.<sup>62</sup> The  
46 Government Program<sup>67-69</sup> based action plan is intended to strengthen the actions at the  
47 infrastructure level, which were minor in 2015. At the same time, it extends the scope of  
48 development towards the meta level, including health and medicines policy-making that can  
49 facilitate infrastructural changes in the medication use process through information guidance,  
50 resource allocation and legislation.<sup>70</sup>  
51  
52  
53  
54  
55  
56  
57  
58  
59  
60

## Strengths and limitations of this study

This pragmatic evaluation was carried out at an early stage of national MI Strategy's implementation. The aim was to conduct an evaluation by interview in order to obtain more detailed information from the stakeholders than would have been obtained, for example, through a survey. The interviews covered the whole range of stakeholders actively involved in implementing the MI Strategy. They can be assumed to be informants with the best understanding of the topic of research. However, the majority of the stakeholder representatives were healthcare professionals, half of them being pharmacists, which may have skewed the results. There was also an absence of real patients with chronic illnesses and medications, which may also distort results. The dynamics of the interviews may have been influenced by the fact that they were conducted as individual, pair or group interviews according to convenience of each stakeholder. The data from different types of interviews were combined and the relative power of the opinions was determined by counting the mentions for each action. The profession or stakeholder group was not specified during the analysis, as the aim was to obtain an overall understanding of the implementation of the medication use process rather than to compare views between professions or stakeholders. Moreover, participants' demographics, except gender, were not collected. The figure of the medication use process (Appendix B) was an important tool in the interviews to keep the discussion focused on core issues. Furthermore, the figure was also utilised as a framework in the deductive analysis, which was supplemented with an inductive analysis of the interview data. Thus, the figure was the basis for conducting the study and it has a strong influence on the study findings.

## Implications and future research

This has been an eye-opening study that has helped us to understand the functionality and shortcomings of the entire medication use process. The theory-base, conceptual model and methodology applied in this study may be useful for future follow-up evaluations, or evaluating medication use processes in other settings. The key shortcomings highlighted by the stakeholders have formed the core of the Rational Pharmacotherapy Action Plan 2018–2022.<sup>62</sup> Actions are underway to improve the coordination and management of medication use process, e.g., by launching a reconciled medication list, and to increase patient engagement and partnership in their care. The Action Plan was based on the Government Program 2015–

1  
2  
3 2019, still being supported by the current Program as part of the ongoing social and health  
4 services reform.<sup>67-69</sup> Thus, it has a strong mandate to change the medication use process. Such  
5 long-term strategies as “Partnership in Medicine Taking” in the UK provide good practices to  
6 be benchmarked.<sup>71</sup> The Chronic Care Model is still a valid theoretical framework for getting  
7 the patient at the centre.<sup>37,38</sup>  
8  
9

10  
11  
12  
13 Future research should focus on investigating the root causes for poor patient involvement in  
14 their own care. To improve medication adherence, the medication use process should be  
15 developed on a patient-oriented basis. This requires more qualitative research that listens to  
16 the long-term patients’ experiences and modifies the medication use process accordingly. The  
17 implementation of the medication use process should be further studied in different patient  
18 groups, as also suggested by the Rational Pharmacotherapy Action Plan.<sup>62,65</sup> The most urgent  
19 need in this respect concerns older people who are at the highest risk for medication-related  
20 harm, particularly in primary care and social care institutions. Research should focus on  
21 enhancing coordination of care and improving usability of electronic systems supporting the  
22 implementation of medication use processes databases and systems.<sup>5,72</sup>  
23  
24  
25  
26  
27  
28  
29  
30

## 31 32 **CONCLUSIONS** 33

34  
35  
36 Weaknesses in the infrastructure of the medication use process reflecting the transfer of patient  
37 information, poorly functioning medication use processes in primary care and limited  
38 participation of patients in their care are priority areas while implementing the next steps of  
39 the national MI Strategy are found. Many of the challenges identified in this evaluation have  
40 been taken into consideration in the MI Strategy’s implementation since 2015, the major  
41 challenges are also in the Rational Pharmacotherapy Action Plan 2018–2022 by the Ministry  
42 of Social Affairs and Health.  
43  
44  
45  
46  
47  
48  
49  
50  
51  
52  
53  
54  
55  
56  
57  
58  
59  
60

1  
2  
3 **Acknowledgements** The authors gratefully acknowledge the members of the National Medicines  
4 Information Network who participated in this study. The authors acknowledge the Elli Turunen Fund  
5 of the Finnish Cultural Foundation for providing funding. The authors warmly thank Perihan Ipek for  
6 assistance in collecting the data, and AMNielsen ApS and Chelsea Schneider for proofreading the  
7 manuscript.  
8

9 **Contributors** NM, MA, MP-M and KH-A have been involved in designing the study, developing  
10 the interview guide, planning the analysis and reporting this particular study. NM performed the  
11 interviews and data analysis. MP-M verified the codings of the data. MA, MP-M and KH-A  
12 contributed in the interpretation of the data. NM prepared the initial draft of the manuscript. MA,  
13 MP-M and KH-A critically reviewed and revised the manuscript. All authors read and gave the final  
14 approval of the version to be published.  
15

16 **Funding** This research was supported by the Elli Turunen Fund of the Finnish Cultural Foundation.  
17 The sponsors had no role in design and conduct of the study; collection, management, analysis, and  
18 interpretation of the data; or in preparation, review, or approval of the manuscript.  
19

20 **Competing interests** None declared.  
21

22 **Patient consent for publication** Not required.  
23

24 **Data availability statement** No additional data available.  
25  
26  
27  
28  
29  
30  
31  
32  
33  
34  
35  
36  
37  
38  
39  
40  
41  
42  
43  
44  
45  
46  
47  
48  
49  
50  
51  
52  
53  
54  
55  
56  
57  
58  
59  
60

**REFERENCES**

- 1 World Health Organization. Innovative care for chronic conditions: Building blocks for actions. Global report. World Health Organization, 2002. [www.who.int/chp/knowledge/publications/iccreport/en/](http://www.who.int/chp/knowledge/publications/iccreport/en/) (Accessed 10 Dec 2019).
- 2 World Health Organization. Adherence to long-term therapies: Evidence for action. World Health Organization, 2003. [www.who.int/chp/knowledge/publications/adherence\\_report/en/](http://www.who.int/chp/knowledge/publications/adherence_report/en/) (Accessed 10 Dec 2019).
- 3 Celio J, Ninane F, Bugnon O, Schneider MP. Pharmacist-nurse collaborations in medication adherence-enhancing interventions: A review. *Patient Educ Couns* 2018;101:1175–92.
- 4 Olsen CF, Bergland A, Debesay J, Bye A, Langaas AG. Striking a balance: Health care providers' experiences with home-based, patient-centered care for older people – A meta-synthesis of qualitative studies. *Patient Educ Couns* 2019;102:1991–2000.
- 5 Toivo T, Dimitrow M, Puustinen J, et al. Coordinating resources for prospective medication risk management of older home care clients in primary care: Procedure development and RCT study design for demonstrating its effectiveness. *BMC Geriatr* 2018;18:74.
- 6 Elvey R, Hassell K, Hall J. Who do you think you are? Pharmacists' perceptions of their professional identity. *Int J Pharm Pract* 2013;21:322–32.
- 7 Kusi-Appiah E, Dahlke S, Stahlke S. Nursing care providers' perceptions on their role contributions in patient care: An integrative review. *J Clin Nurs* 2018;27:3830–45.
- 8 Lawrence RA, McLoone JK, Wakefield CE, Cohn RJ. Primary care physicians' perspectives of their role in cancer care: A systematic review. *J Gen Intern Med* 2016;31:1222–36.
- 9 Berland A, Bentsen SB. Medication errors in home care: A qualitative focus group study. *J Clin Nurs* 2017;26:3734–41.
- 10 Teinilä T, Kaunisvesi K, Airaksinen M. Primary care physicians' perceptions of medication errors and error prevention in cooperation with community pharmacists. *Res Social Adm Pharm* 2011;7:162–79.
- 11 van Sluisveld N, Zegers M, Natsch S, Wollersheim H. Medication reconciliation at hospital admission and discharge: Insufficient knowledge, unclear task reallocation and lack of collaboration as major barriers to medication safety. *BMC Health Serv Res* 2012;12:170.
- 12 Mohammed AM, Moles RJ, Chen TF. Medication-related burden and patients' lived experience with medicine: A systematic review and metasynthesis of qualitative studies. *BMJ Open* 2016;6:e010035.
- 13 Kekäle M. Chronic myeloid leukemia patients' adherence to tyrosine kinase inhibitors in Finland: A journey of eighty-six patients [dissertation]. University of Helsinki, 2016. <http://urn.fi/URN:ISBN:978-951-51-2353-4>.

- 1  
2  
3 14 Puspitasari HP, Aslani P, Krass I. Pharmacists' and consumers' viewpoints on counselling  
4 on prescription medicines in Australian community pharmacies. *Int J Pharm Pract*  
5 2010;18:202–8.  
6  
7  
8 15 Chisholm-Burns MA, Lee JK, Spivey CA, et al. US pharmacists' effect as team members  
9 on patient care: Systematic review and meta-analyses. *Med Care* 2010;48:923–33.  
10  
11 16 European Commission. High Level Pharmaceutical Forum 2005-2008: Conclusions and  
12 recommendations. European Communities, 2008.  
13 [https://publications.europa.eu/en/publication-detail/-/publication/4fddf639-47cc-4f90-9964-](https://publications.europa.eu/en/publication-detail/-/publication/4fddf639-47cc-4f90-9964-142757d2515a)  
14 [142757d2515a](https://publications.europa.eu/en/publication-detail/-/publication/4fddf639-47cc-4f90-9964-142757d2515a) (Accessed 10 Dec 2019).  
15  
16  
17 17 International Pharmaceutical Federation. Medicines information: strategic development.  
18 The Hague: International Pharmaceutical Federation, 2017.  
19 [www.fip.org/www/streamfile.php?filename=fip/publications/2017-01-Medicines-](http://www.fip.org/www/streamfile.php?filename=fip/publications/2017-01-Medicines-information-strategic-development.pdf)  
20 [information-strategic-development.pdf](http://www.fip.org/www/streamfile.php?filename=fip/publications/2017-01-Medicines-information-strategic-development.pdf) (Accessed 10 Dec 2019).  
21  
22  
23 18 Ryan R, Santesso N, Lowe D, et al. Interventions to improve safe and effective medicines  
24 use by consumers: An overview of systematic reviews. *Cochrane Database Syst Rev*  
25 2014;CD007768.  
26  
27 19 Van Camp YP, Van Rompaey B, Elseviers MM. Nurse-led interventions to enhance  
28 adherence to chronic medication: Systematic review and meta-analysis of randomised  
29 controlled trials. *Eur J Clin Pharmacol* 2013;69:761–70.  
30  
31  
32 20 Zolnieriek KBH, DiMatteo MR. Physician communication and patient adherence to  
33 treatment: A meta-analysis. *Med Care* 2009;47:826–34.  
34  
35 21 Mononen N, Airaksinen MSA, Hämeen-Anttila K, Helakorpi S, Pohjanoksa-Mäntylä M.  
36 Trends in the receipt of medicines information among Finnish adults in 1999–2014: A  
37 nationwide repeated cross-sectional survey. *BMJ Open* 2019;9:e026377.  
38  
39  
40 22 European Commission. High Level Group on innovation and provision of medicines in  
41 the European Union: Recommendations for action. G10 Medicines report. European  
42 Communities, 2002. [http://ec.europa.eu/health/ph\\_overview/Documents/key08\\_en.pdf](http://ec.europa.eu/health/ph_overview/Documents/key08_en.pdf)  
43 (Accessed 10 Dec 2019).  
44  
45  
46 23 Ministry of Social Affairs and Health. Medicines Policy 2020: Towards efficient, safe,  
47 rational and cost effective use of medicines. Publications of the Ministry of Social Affairs  
48 and Health, 2011. <http://urn.fi/URN:ISBN:978-952-00-3165-7> (Accessed 10 Dec 2019).  
49  
50  
51 24 Finnish Medicines Agency Fimea. Rational use of medicines through information and  
52 guidance – Medicines information services: Current state and strategy for 2020. Serial  
53 Publication Fimea Develops, Assesses and Informs, 2012. [http://urn.fi/URN:ISBN:978-952-](http://urn.fi/URN:ISBN:978-952-5624-21-2)  
54 [5624-21-2](http://urn.fi/URN:ISBN:978-952-5624-21-2) (Accessed 10 Dec 2019).  
55  
56  
57 25 Hämeen-Anttila K, Luhtanen S, Airaksinen M, Pohjanoksa-Mäntylä M. Developing a  
58 national medicines information strategy in Finland – A stakeholders' perspective on the  
59 strengths, challenges and opportunities in medicines information. *Health Policy*  
60 2013;111:200–5.



- 1  
2  
3 26 Airaksinen M, Ahonen R, Enlund H. The questions to ask about your medicines  
4 campaign – An evaluation of pharmacists and the public’s response. *Med Care*  
5 1998;36:422–7.  
6  
7  
8 27 Kansanaho H. Implementation of the principles of patient counselling into practice in  
9 Finnish community pharmacies [dissertation]. University of Helsinki, 2006.  
10 <http://urn.fi/URN:ISBN:952-10-2877-7>.  
11  
12 28 Mononen N, Järvinen R, Hämeen-Anttila K, et al. A national approach to medicines  
13 information research: A systematic review. *Res Social Adm Pharm* 2018;14:1106–24.  
14  
15 29 Pohjanoksa-Mäntylä M. Medicines information sources and services for consumers: A  
16 special focus on the Internet and people with depression [dissertation]. University of  
17 Helsinki, 2010. <http://urn.fi/URN:ISBN:978-952-10-6128-8>.  
18  
19 30 Puumalainen I. Development of instruments to measure the quality of patient counselling  
20 [dissertation]. University of Kuopio, 2005. <http://urn.fi/URN:ISBN:951-27-0053-0>.  
21  
22 31 Medicines Act (Finland) 395/1987. [https://www.finlex.fi/fi/laki/ajantasa/1987/](https://www.finlex.fi/fi/laki/ajantasa/1987/19870395)  
23 19870395 (Accessed 10 Dec 2019).  
24  
25 32 Decree on the prescription of medicines 1088/2010.  
26 <https://www.finlex.fi/fi/laki/alkup/2010/20101088> (Accessed 10 Dec 2019).  
27  
28 33 Salonen I. National Medicines Information Strategy – Medicines related political actions  
29 in Finland and in the European Union in the 21st century to improve the quality and  
30 availability of the medicines information directed to the consumers [master’s thesis].  
31 University of Helsinki, 2010. <http://urn.fi/URN:NBN:fi-fe20180115196> (Accessed 7 Mar  
32 2020).  
33  
34 34 Department of Health. Better information, better choices, better health – Putting  
35 information at the centre of health. London: Department of Health, 2004.  
36  
37 35 Young N. National strategies for health and medicines information in the European  
38 Union: Experiences in the UK and Finland. Report. University of Helsinki, 2010.  
39  
40 36 Järvinen R, Enlund H, Airaksinen M, Kleme J, Mononen N, Hämeen-Anttila K.  
41 Medicines information research in Finland – A report to support the activities of the  
42 Medicines Information Network. Serial Publication Fimea Develops, Assesses and Informs  
43 7/2013. Finnish Medicines Agency, 2013. <http://urn.fi/URN:ISBN:978-952-5624-37-3>  
44 (Accessed 7 Mar 2020).  
45  
46 37 Wagner E.H. Chronic disease management: What will it take to improve care for chronic  
47 illness? *Eff Clin Pract* 1998;1:2–4.  
48  
49 38 Wagner EH, Austin BT, Hindmarsh M, Schaefer J, Bonomi A. Improving chronic illness  
50 care: Translating evidence into action. *Health Aff (Millwood)* 2001;20:64–78.  
51  
52  
53  
54  
55  
56  
57  
58  
59  
60

- 1  
2  
3 39 Nikander J, Tuominen-Thuesen M. National development programme for social welfare  
4 and health care (KASTE 2010–2015) External evaluation – Final report. Reports and  
5 memorandums of the Ministry of Social Affairs and Health, 2016.  
6 <http://urn.fi/URN:ISBN:978-952-00-3800-7> (Accessed 10 Dec 2019).  
7  
8  
9 40 Bults M, Beaujean DJMA, Wijkmans CJ, Timen A, Richardus JH, Voeten HACM. Why  
10 did patients with cardiovascular disease in the Netherlands accept Q fever vaccination?  
11 *Vaccine* 2012;30:3369–75.  
12  
13 41 Hamrosi KK, Aslani P, Raynor DK. Beyond needs and expectations: Identifying the  
14 barriers and facilitators to written medicine information provision and use in Australia.  
15 *Health Expect* 2014;17:220–31.  
16  
17 42 Hamrosi KK, Raynor DK, Aslani P. Pharmacist, general practitioner and consumer use of  
18 written medicine information in Australia: Are they on the same page? *Res Social Adm*  
19 *Pharm* 2014;10:656–68.  
20  
21 43 Hämeen-Anttila K, Pietilä K, Pykkänen L, Pohjanoksa-Mäntylä M. Internet as a source  
22 of medicines information (MI) among frequent internet users. *Res Soc Adm Pharm*  
23 2018;14:758–764.  
24  
25 44 Armitage LC, Kassavou A, Sutton S. Do mobile device apps designed to support  
26 medication adherence demonstrate efficacy? A systematic review of randomised controlled  
27 trials, with meta-analysis. *BMJ Open* 2020;10:e032045.  
28  
29 45 Baumgartner PC, Haynes RB, Hersberger KE, Arnet I. A systematic review of  
30 medication adherence thresholds dependent of clinical outcomes. *Front Pharmacol*  
31 2018;9:1290.  
32  
33 46 Conn VS, Ruppap TM, Enriquez M, Cooper P. Medication adherence interventions that  
34 target subjects with adherence problems: Systematic review and meta-analysis. *Res Social*  
35 *Adm Pharm* 2016;12:218–46.  
36  
37 47 Conn VS, Ruppap TM, Enriquez M, Cooper PS. Patient-centered outcomes of medication  
38 adherence interventions: Systematic review and meta-analysis. *Value Health* 2016;19:277–  
39 85.  
40  
41 48 Costa E, Giardini A, Savin M, et al. Interventional tools to improve medication  
42 adherence: Review of literature. *Patient Prefer Adherence* 2015;9:1303–14.  
43  
44 49 Torres-Robles A, Wiecek E, Tonin FS, Benrimoj SI, Fernandez-Llimos F, Garcia-  
45 CardenasV. Comparison of interventions to improve long-term medication adherence across  
46 different clinical conditions: A systematic review with network meta-analysis. *Front*  
47 *Pharmacol* 2018;9:1454.  
48  
49 50 Hepler CD, Strand LM. Opportunities and responsibilities in pharmaceutical care. *Am J*  
50 *Hosp Pharm* 1990;7:533–43.  
51  
52 51 Gale NK, Heath G, Cameron E, Rashid S, Redwood S. Using the framework method for  
53 the analysis of qualitative data in multi-disciplinary health research. *BMC Med Res*  
54 *Methodol* 2013;13:117.  
55  
56  
57  
58  
59  
60

- 1  
2  
3 52 Valentijn PP, Schepman SM. Understanding integrated care: A comprehensive  
4 conceptual framework based on the integrative functions on primary care. *Int J Integr Care*  
5 2013;13:e010.  
6  
7  
8 53 O'Brien BC, Harris IB, Beckman TJ, Reed DA, Cook DA. Standards for reporting  
9 qualitative research: a synthesis of recommendations. *Acad Med* 2014;89:1245–51.  
10  
11 54 Elo S, Kääriäinen M, Kanste O, Pölkki T, Utriainen K, Kyngäs H. Qualitative content  
12 analysis: A focus on trustworthiness. *SAGE Open* 2014;4.  
13  
14 55 Raskind IG, Shelton RC, Comeau DL, Cooper HLF, Griffith DM, Kegler MC. A review  
15 of qualitative data analysis practices in health education and health behavior research.  
16 *Health Educ Behav* 2019; 46:32-39.  
17  
18 56 Finnish National Board on Research Integrity TENK. The ethical principles of research  
19 with human participants and ethical review in the human sciences in Finland.  
20 [www.tenk.fi/sites/tenk.fi/files/Ihmistieteiden\\_eettisen\\_ennakkoarvioinnin\\_ohje\\_2019.pdf](http://www.tenk.fi/sites/tenk.fi/files/Ihmistieteiden_eettisen_ennakkoarvioinnin_ohje_2019.pdf)  
21 (Accessed 10 Dec 2019).  
22  
23  
24 57 Kallio S, Kumpusalo-Vauhkonen A, Järvensivu T, Mäntylä A, Pohjanoksa-Mäntylä M,  
25 Airaksinen M. Towards interprofessional networking in medication management of the  
26 aged: Current challenges and potential solutions in Finland. *Scand J Prim Health Care*  
27 2016;34:368–76.  
28  
29 58 Sawan M, Jeon YH, Chen TF. Relationship between organizational culture and the use of  
30 psychotropic medicines in nursing homes: A systematic integrative review. *Drugs Aging*  
31 2018;35:189–211.  
32  
33 59 Sneek S, Saarnio R, Isola A, Boigu R. Medication competency of nurses according to  
34 theoretical and drug calculation online exams: A descriptive correlational study. *Nurse Educ Today* 2016;36:195–201.  
35  
36 60 Sulosaari V, Huupponen R, Tornainen K, Hupli M, Puukka P, Leino-Kilpi H.  
37 Medication education in nursing programmes in Finland - Findings from a national survey.  
38 *Collegian* 2014;21:327–35.  
39  
40 61 World Health Organization. Medication without harm: Global patient safety challenge on  
41 medication safety. World Health Organization, 2017.  
42 [www.who.int/patientsafety/medication-safety/medication-without-harm-brochure/en/](http://www.who.int/patientsafety/medication-safety/medication-without-harm-brochure/en/)  
43 (Accessed 10 Dec 2019).  
44  
45 62 Hämeen-Anttila K, Närhi U, Tahvanainen H. Rational Pharmacotherapy action plan –  
46 Final report. Reports and memorandums of the Ministry of Social Affairs and Health, 2018.  
47 <http://urn.fi/URN:ISBN:978-952-00-3930-1> (Accessed 10 Dec 2019).  
48  
49 63 National Institute for Health and Care Excellence NICE. Medicines optimisation: the safe  
50 and effective use of medicines to enable the best possible outcomes. National Institute for  
51 Health and Care Excellence NICE, 2015. <https://www.nice.org.uk/guidance/ng5> (Accessed  
52 10 Mar 2020).  
53  
54  
55  
56  
57  
58  
59  
60

1  
2  
3 64 World Health Organization. Health 2020: A European policy framework and strategy for  
4 the 21st century. World Health Organization, 2013.

5 [http://www.euro.who.int/\\_\\_data/assets/pdf\\_file/0011/199532/Health2020-Long.pdf?ua=1](http://www.euro.who.int/__data/assets/pdf_file/0011/199532/Health2020-Long.pdf?ua=1)  
6 (Accessed 10 Mar 2020).  
7

8  
9 65 Airaksinen M, Hämeen-Anttila K, Saastamoinen L. Effective use of research data:  
10 Research strategy for rational pharmacotherapy 2018–2022. Reports and memorandums of  
11 the Ministry of Social Affairs and Health, 2018. <http://urn.fi/URN:ISBN:978-952-00-3905-9>  
12 (Accessed 10 Dec 2019).  
13

14  
15 66 United States Pharmacopeia. Medication counselling behavior guidelines. United States  
16 Pharmacopeia, 1997.  
17

18  
19 67 Prime Minister's Office. Finland, a land of solutions – Strategic programme of Prime  
20 Minister Juha Sipilä's Government 29 May 2015. Government Publications, 2015.  
21 [https://vnk.fi/documents/10184/1427398/Ratkaisujen+Suomi\\_EN\\_YHDISTETTY\\_netti.pdf/  
22 8d2e1a66-e24a-4073-8303-ee3127fbfcac/Ratkaisujen+Suomi\\_EN\\_YHDISTETTY\\_netti.pdf](https://vnk.fi/documents/10184/1427398/Ratkaisujen+Suomi_EN_YHDISTETTY_netti.pdf/8d2e1a66-e24a-4073-8303-ee3127fbfcac/Ratkaisujen+Suomi_EN_YHDISTETTY_netti.pdf)  
23 (Accessed 10 Dec 2019).  
24

25  
26 68 Finnish Government. Programme of Prime Minister Antti Rinne's Government 6 June  
27 2019. Inclusive and competent Finland – A socially, economically and ecologically  
28 sustainable society. Publications of the Finnish Government, 2019.  
29 <http://urn.fi/URN:ISBN:978-952-287-760-4> (Accessed 10 Dec 2019).  
30

31  
32 69 Finnish Government. Programme of Prime Minister Sanna Marin's Government 10  
33 December 2019. Inclusive and competent Finland – A socially, economically and  
34 ecologically sustainable society. Publications of the Finnish Government, 2019.  
35 <http://urn.fi/URN:ISBN:978-952-287-811-3> (Accessed 27 Mar 2020).  
36

37  
38 70 Guler S, Hurton, S, Winn MC, Molinari M. Levels in decision making and techniques for  
39 clinicians. *International Journal of Digestive Diseases* 2015;1.

40  
41 71 Marinker M, Royal Pharmaceutical Society of Great Britain. From compliance to  
42 concordance: Achieving shared goals in medicine taking. London: Royal Pharmaceutical  
43 Society in partnership with Merck Sharp & Dohme, 1997.  
44

45  
46 72 Toivo T, Airaksinen M, Dimitrow M, et al. Enhanced coordination of care to reduce  
47 medication risks in older home care clients in primary care: a randomized controlled trial.  
48 *BMC Geriatr* 2019;19:332.  
49  
50  
51  
52  
53  
54  
55  
56  
57  
58  
59  
60

## LEGENDS OF THE FIGURES

Fig. 1 Content analysis process applying the Framework Method.<sup>51</sup>

Fig. 2 Categories of themes derived deductively (marked as blue) and inductively (marked as green) from the stakeholders' interviews (n=42, involving 79 interviewees) on well-implemented actions and actions needing development in medication use process for patients with chronic illnesses. (n=a summative of number of the single interviewee's mentions)

Fig. 3 Stakeholders' views on well-implemented actions in medication use process for patients with chronic illnesses. Categories derived deductively are marked as blue (n=7) and categories emerged inductively from the stakeholders' interviews are marked as green (n=3). (n=a summative of number of the single interviewee's mentions, HCP=healthcare professional)

Fig. 4 Stakeholders' views on actions needing development in medication use process for patients with chronic illnesses. Categories derived deductively are marked as blue (n=7) and categories emerged inductively from the stakeholders' interviews are marked as green (n=3). (n=a summative of number of the single interviewee's mentions, HCP=healthcare professional)

1  
2  
3  
4  
5  
6  
7  
8  
9  
10  
11  
12  
13  
14  
15  
16  
17  
18  
19  
20  
21  
22  
23  
24  
25  
26  
27  
28  
29  
30  
31  
32  
33  
34  
35  
36  
37  
38  
39  
40  
41  
42  
43  
44  
45  
46  
47  
48  
49  
50  
51  
52  
53  
54  
55  
56  
57  
58  
59  
60

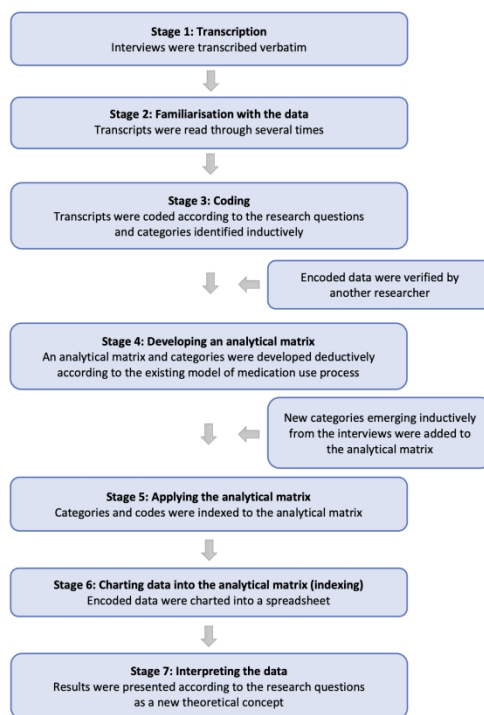

Fig. 1 Content analysis process applying the Framework Method.<sup>46</sup>

209x297mm (300 x 300 DPI)



Fig. 2 Categories of themes derived deductively (marked as blue) and inductively (marked as green) from the stakeholders' interviews (n=42, involving 79 interviewees) on well-implemented actions and actions needing development in medication use process for patients with chronic illnesses. (n=a summative of number of the single interviewee's mentions)

209x297mm (300 x 300 DPI)



<sup>a</sup>All prescriptions must be electronically prescribed from 1 January 2017, <sup>b</sup>e.g. clinical pharmacology consultation services and comprehensive medication reviews.

Fig. 3 Stakeholders' views on well-implemented actions in medication use process for patients with chronic illnesses. Categories derived deductively are marked as blue (n=7) and categories emerged inductively from the stakeholders' interviews are marked as green (n=3). (n=a summative of number of the single interviewee's mentions, HCP=healthcare professional)

297x209mm (300 x 300 DPI)



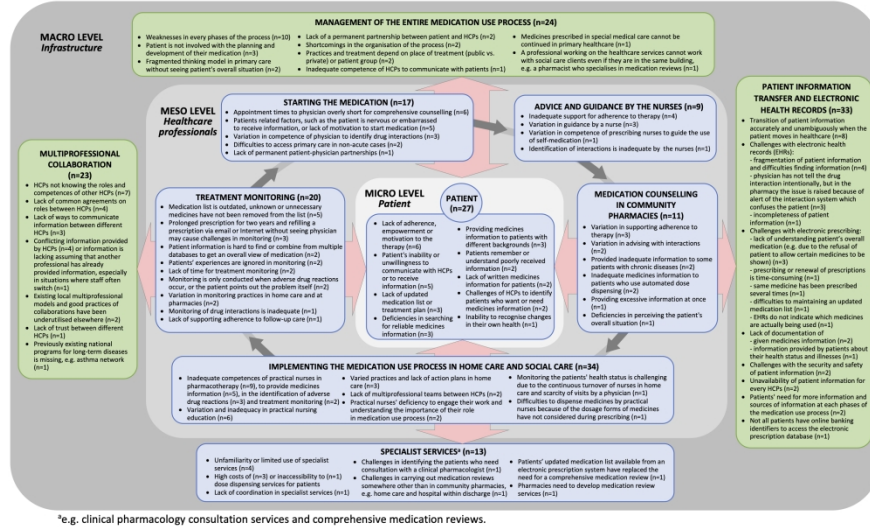

Fig. 4 Stakeholders' views on actions needing development in medication use process for patients with chronic illnesses. Categories derived deductively are marked as blue (n=7) and categories emerged inductively from the stakeholders' interviews are marked as green (n=3). (n=a summative of number of the single interviewee's mentions, HCP=healthcare professional)

297x209mm (300 x 300 DPI)

Appendix A. Evolution and milestones of medicines information to patients in Finland since the 1960s.

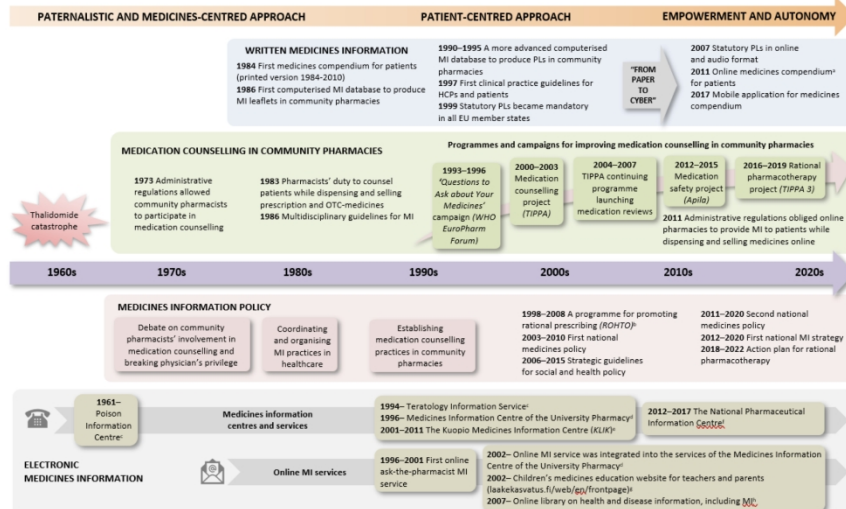

EU-European Union, HCP-healthcare professional, MI-medicines information, OTC-over the counter, PI-package leaflet. \*Initially worked as a project in 1998-2001, and after that operated as the Centre for Pharmacotherapy Development ROHTO under the Ministry of Social Affairs and Health (2002-2008). \*Service provided by the Hospital District of Helsinki and Uusimaa (HUS). \*Service provided by the University Pharmacy which is owned by University of Helsinki. \*Owned by the University of Kuopio/the University of Eastern Finland. \*Owned by the University of Eastern Finland and Pharmaceutical Information Centre in 2012-2014, owned by Pharmaceutical Information Centre since 2015, and provided MI service to consumers until 2017. \*Website portal owned by the University of Kuopio/the University of Eastern Finland during 2002-2011, since 2012 owned by the Finnish Medicines Agency Fimea. \*Owned by the Finnish Medical Society Duodecim.

297x209mm (300 x 300 DPI)

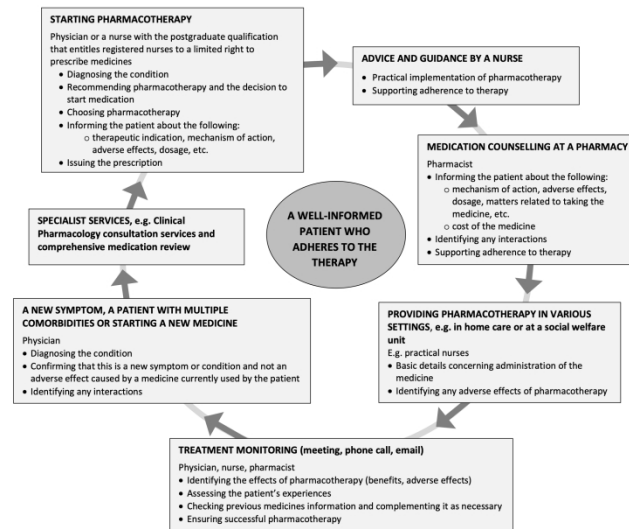

Appendix B. Medicine use process for patients with chronic illnesses as illustrated in the National Medicines Information Strategy (© Fimea 2012).<sup>24</sup>

297x209mm (300 x 300 DPI)

**Appendix C.** Illustrative examples of the expressions (translated from Finnish) mentioned by the interviewees on the well-implemented actions and actions needing development in the medication use process categorised by main categories (n=10) emerged from the interviews. (P=participant of the study)

| MAIN CATEGORIES                                            | WELL-IMPLEMENTED ACTIONS                                                                                                                                                                                                                                                                                                                                                                 | ACTIONS NEEDING DEVELOPMENT                                                                                                                                                                                                                                                                                                                                                                                                                                                                                                                                                                                                                                                                                                                                        |
|------------------------------------------------------------|------------------------------------------------------------------------------------------------------------------------------------------------------------------------------------------------------------------------------------------------------------------------------------------------------------------------------------------------------------------------------------------|--------------------------------------------------------------------------------------------------------------------------------------------------------------------------------------------------------------------------------------------------------------------------------------------------------------------------------------------------------------------------------------------------------------------------------------------------------------------------------------------------------------------------------------------------------------------------------------------------------------------------------------------------------------------------------------------------------------------------------------------------------------------|
| <b>Infrastructure level (macro)</b>                        |                                                                                                                                                                                                                                                                                                                                                                                          |                                                                                                                                                                                                                                                                                                                                                                                                                                                                                                                                                                                                                                                                                                                                                                    |
| Management of the entire medication use process            | No mentions.                                                                                                                                                                                                                                                                                                                                                                             | <p>“Well, it’s not an individual employee, but the entire medication use process should be better organised...”<br/>[representative from the hospital, P72]</p> <p>“And it also happens in primary healthcare, that they do identify a single illness or health problem but do not take account the person as a whole. This represents a fragmented way of thinking.”<br/>[representative from the university, P42]</p>                                                                                                                                                                                                                                                                                                                                            |
| Patient information transfer and electronic health records | <p>“Electronic prescriptions have provided more clarity [to the medication use process ]... via electronic prescription, with both nurses and physician providing patient care, for example for elderly people have a more comprehensive and updated view on patients’ medication than previously. It has been a great improvement...”<br/>[representative from the university, P40]</p> | <p>“Numerous investigations have identified problems, such as lack of critical patient information or incorrect information transfer, in the medication use process. It’s scary. In a way, it pulls the plug out of many things.”<br/>[representative from the scientific society, P66]</p> <p>“Well, I think we should pay attention to how medications are recorded in the electronic health records and how information is safely visible there. That’s catastrophic, that the same medicine may be listed there many times. But instead there is no information on when medication has been started or discontinued. [Medication] lists don’t update themselves, but someone needs to reconcile them.”<br/>[representative from the healthcare center, P9]</p> |
| Multiprofessional collaboration                            | <p>“Excellent local multiprofessional models for cooperation, particularly in long-term patient care, already exist.”<br/>[representative from the national authority, P6]</p>                                                                                                                                                                                                           | <p>“Healthcare professionals should know better the tasks and responsibilities of each other, and, on the other hand, should also be familiar with each other’s knowledge, and what they can and cannot do.”<br/>[representative from the university, P40]</p> <p>“Do we know the skills of different health professionals [participating in the medication use process] well enough and how we could make optimal use of them. On the other hand, can we fully trust other professions.”<br/>[representative from the professional organisation, P18]</p>                                                                                                                                                                                                         |
| Specialist services                                        | No mentions.                                                                                                                                                                                                                                                                                                                                                                             | <p>“Comprehensive medication reviews... big efforts should be made to make the reviews available to patients in need, so that they don’t have to pay for them themselves. This referral policy or some other way, such as the implementation of medication reviews at the pharmacies, is still unrealised.”<br/>[representative from the professional organisation, P23]</p>                                                                                                                                                                                                                                                                                                                                                                                       |

| Healthcare professionals level ( <i>meso</i> )     |                                                                                                                                                                                                                                                                                                                                                                                                                                                                                                                                               |                                                                                                                                                                                                                                                                                                                                                                                                                                                                                                                                                                                                                                                                                                                                                      |
|----------------------------------------------------|-----------------------------------------------------------------------------------------------------------------------------------------------------------------------------------------------------------------------------------------------------------------------------------------------------------------------------------------------------------------------------------------------------------------------------------------------------------------------------------------------------------------------------------------------|------------------------------------------------------------------------------------------------------------------------------------------------------------------------------------------------------------------------------------------------------------------------------------------------------------------------------------------------------------------------------------------------------------------------------------------------------------------------------------------------------------------------------------------------------------------------------------------------------------------------------------------------------------------------------------------------------------------------------------------------------|
| Starting the medication                            | <p>“Starting the medication works rather well at the moment. It is always a physician who diagnoses a disease and counsels the patient how to manage their disease and treatment. Additionally, there is also a nurse commonly involved in counselling. Especially from the perspective of special care, this stage of the medication use process seems to work.”<br/>[representative from the hospital districts, P73]</p> <p>“Starting the medication, I think it works relatively well.”<br/>[representative from the university, P69]</p> | <p>“As a physician, I commonly prescribe medicines. While prescribing, there is often limited time for medication counselling. You just really manage to say that “here is your prescription and inform how patient should take her/his medication.”<br/>[representative from the patient organisation, P71]</p> <p>“Usually, patients are not very responsive to counselling, they may not remember what they have been told during the physician’s visit.<br/>[representative from the professional organisation, P51]</p>                                                                                                                                                                                                                         |
| Advice and guidance by nurses                      | <p>“I do have the belief that while the nurses and midwives have limited prescribing rights, they also have a good knowledge on what to tell patients about medicines.”<br/>[representative from the patient organisation, P56]</p> <p>“And of course, In special medical care, patients will receive the best counselling on their medicines. This concerns for example cancer patients.”<br/>[representative from community pharmacy, P64]</p>                                                                                              | <p>“Advice and guidance given by a nurse varies greatly depending on the resources and indications.”<br/>[representative from the patient organisation, P71]</p> <p>“Nurses should support their patients’ adherence.”<br/>[representative from the professional organisation, P26]</p> <p>“Nurses may not counsel patients much about drug-drug interactions, although it would be really crucial for all patients.”<br/>[representative from the polytechnic, P74]</p>                                                                                                                                                                                                                                                                             |
| Medication counselling in the community pharmacies | <p>“The best knowledge about medicines is really in the community pharmacies.”<br/>[representative from the professional organisation, P50]</p> <p>“The process is best implemented in community pharmacies. There has been a systematic attempt to develop medication counselling for patients with certain diseases, such as asthma and other chronic diseases.”<br/>[representative from the scientific society, P59]</p>                                                                                                                  | <p>“Pharmacists should not give as much information about medicines as they currently do. It is probably because they wish to play safe and explain all the possible adverse drug reactions and all other things. It may result in decreased adherence.”<br/>[representative from the university, P78]</p> <p>“Supporting medication adherence, I do not know, maybe it is supported in some way, but I also think there occurs [among healthcare professionals] some paternalistic ways of thinking. They may consider that there is no need to tell everything. If the physician prescribes and counsels something, the patient should just take his or her medication and follow instructions.”<br/>[representative from the university, P28]</p> |

|                                                                      |                                                                      |                                                                                                                                                                                                                                                                                |                                                                                                                                                                                                                                                                                                                                                                                                                                                                                                                                           |
|----------------------------------------------------------------------|----------------------------------------------------------------------|--------------------------------------------------------------------------------------------------------------------------------------------------------------------------------------------------------------------------------------------------------------------------------|-------------------------------------------------------------------------------------------------------------------------------------------------------------------------------------------------------------------------------------------------------------------------------------------------------------------------------------------------------------------------------------------------------------------------------------------------------------------------------------------------------------------------------------------|
| 1<br>2<br>3<br>4<br>5<br>6<br>7<br>8<br>9<br>10<br>11                | Implementing the medication use process in home care and social care | “I would believe and really hope that practical nurses have a good basic knowledge on the administration of medicines.”<br><i>[representative from the university, P76]</i>                                                                                                    | “There is quite a lot of variation in nursing education as I understand it, because the aims of the education are formulated relatively loosely, and it depends on the local possibilities.”<br><i>[representative from the university, P40]</i>                                                                                                                                                                                                                                                                                          |
| 12<br>13<br>14<br>15<br>16<br>17<br>18<br>19<br>20<br>21<br>22       | Treatment monitoring                                                 | “Treatments are well-monitored in relation to chronic medications and chronic illnesses, such as diabetes. Then there is a regular contact with particular physician.”<br><i>[representative from the university, P42]</i>                                                     | “This medication use process is as strong as its weakest and less educated link, which commonly is a practical nurse or assistant or even an entirely untrained person who medicates patients. It is not certain if they have updated information and knowledge. Either they may not have for example ability to identify adverse drug reactions.”<br><i>[representative from the patient association, P49]</i>                                                                                                                           |
| 23                                                                   | <b>Patient level (micro)</b>                                         |                                                                                                                                                                                                                                                                                |                                                                                                                                                                                                                                                                                                                                                                                                                                                                                                                                           |
| 24<br>25<br>26<br>27<br>28<br>29<br>30<br>31<br>32<br>33<br>34       | Patient                                                              | “Patients with chronic illnesses know a lot about their condition and medications. They also seek information. I’m not worried about the information sources that they use. Certainly, most of them use reliable sources.”<br><i>[representative from the university, P78]</i> | It is really a challenge at the moment that the medication lists are not updated... And I think it is especially difficult when patient has multiple medications in use...When you have a lot of medicines which have all been prescribed in different places and by different physician, it seems that there is sometimes no one with the overall idea of the drug load.<br><i>[representative from the pharmacy, P21]</i>                                                                                                               |
| 35<br>36<br>37<br>38<br>39<br>40<br>41<br>42<br>43<br>44<br>45<br>46 |                                                                      |                                                                                                                                                                                                                                                                                | “Treatment monitoring, and especially the identification of potential adverse drug reactions, is perhaps the most challenging part in the medication use process. People do not know when to contact healthcare. It is also unclear how well they [ADR’s] are recognised in healthcare. That’s the challenge.”<br><i>[representative from the patient organisation, P71]</i>                                                                                                                                                              |
|                                                                      |                                                                      |                                                                                                                                                                                                                                                                                | “Patients do not even want to know [about the medicines they use]. This is something that healthcare professionals should recognise. They do not really remember all things that they have been told, and there is not even enough time for medication counselling during the visit with physician. In particular, when they receive a new diagnosis, they can concentrate only on that, and it is fair enough if they remember to take their pill every day, that’s enough.”<br><i>[representative from the scientific society, P29]</i> |
|                                                                      |                                                                      |                                                                                                                                                                                                                                                                                | “It is really difficult to ask questions [from the physician] as patients may not know what to ask. And on the other hand, patients may be afraid that they will ask naive questions...”<br><i>[representative from the university, P76]</i>                                                                                                                                                                                                                                                                                              |

# Reporting checklist for qualitative study.

Based on the SRQR guidelines.

## Instructions to authors

Complete this checklist by entering the page numbers from your manuscript where readers will find each of the items listed below.

Your article may not currently address all the items on the checklist. Please modify your text to include the missing information. If you are certain that an item does not apply, please write "n/a" and provide a short explanation.

Upload your completed checklist as an extra file when you submit to a journal.

In your methods section, say that you used the SRQR reporting guidelines, and cite them as:

O'Brien BC, Harris IB, Beckman TJ, Reed DA, Cook DA. Standards for reporting qualitative research: a synthesis of recommendations. Acad Med. 2014;89(9):1245-1251.

|              | Reporting Item                                                                                                                                                                                                                                                 | Page Number |
|--------------|----------------------------------------------------------------------------------------------------------------------------------------------------------------------------------------------------------------------------------------------------------------|-------------|
| <b>Title</b> | <p><a href="#">#1</a> Concise description of the nature and topic of the study identifying the study as qualitative or indicating the approach (e.g. ethnography, grounded theory) or data collection methods (e.g. interview, focus group) is recommended</p> | 1           |

## Abstract

[#2](#) Summary of the key elements of the study using the abstract format of the intended publication; typically includes background, purpose, methods, results and conclusions

## Introduction

[#3](#) Description and significance of the problem / phenomenon studied: review of relevant theory and empirical work; problem statement

[#4](#) Purpose of the study and specific objectives or question

## Methods

[#5](#) Qualitative approach and research paradigm

Qualitative approach (e.g. ethnography, grounded theory, case study, phenomenology, narrative research) and guiding theory if appropriate; identifying the research paradigm (e.g. postpositivist, constructivist / interpretivist) is also recommended; rationale. The rationale should briefly discuss the justification for choosing that theory, approach, method or technique rather than other options available; the assumptions and limitations implicit in those choices and how those choices influence study conclusions and transferability. As appropriate the



|    |                           |                     |                                                           |          |
|----|---------------------------|---------------------|-----------------------------------------------------------|----------|
| 1  |                           |                     | rationale for several items might be discussed            |          |
| 2  |                           |                     |                                                           |          |
| 3  |                           |                     | together.                                                 |          |
| 4  |                           |                     |                                                           |          |
| 5  |                           |                     |                                                           |          |
| 6  | Researcher                | <a href="#">#6</a>  | Researchers' characteristics that may influence the       | 7        |
| 7  |                           |                     |                                                           |          |
| 8  | characteristics and       |                     | research, including personal attributes, qualifications / |          |
| 9  |                           |                     |                                                           |          |
| 10 | reflexivity               |                     | experience, relationship with participants,               |          |
| 11 |                           |                     |                                                           |          |
| 12 |                           |                     | assumptions and / or presuppositions; potential or        |          |
| 13 |                           |                     |                                                           |          |
| 14 |                           |                     | actual interaction between researchers' characteristics   |          |
| 15 |                           |                     |                                                           |          |
| 16 |                           |                     | and the research questions, approach, methods,            |          |
| 17 |                           |                     |                                                           |          |
| 18 |                           |                     | results and / or transferability                          |          |
| 19 |                           |                     |                                                           |          |
| 20 |                           |                     |                                                           |          |
| 21 |                           |                     |                                                           |          |
| 22 | Context                   | <a href="#">#7</a>  | Setting / site and salient contextual factors; rationale  | 5,6      |
| 23 |                           |                     |                                                           |          |
| 24 |                           |                     |                                                           |          |
| 25 | Sampling strategy         | <a href="#">#8</a>  | How and why research participants, documents, or          | 5,6      |
| 26 |                           |                     |                                                           |          |
| 27 |                           |                     | events were selected; criteria for deciding when no       |          |
| 28 |                           |                     |                                                           |          |
| 29 |                           |                     | further sampling was necessary (e.g. sampling             |          |
| 30 |                           |                     |                                                           |          |
| 31 |                           |                     | saturation); rationale                                    |          |
| 32 |                           |                     |                                                           |          |
| 33 |                           |                     |                                                           |          |
| 34 |                           |                     |                                                           |          |
| 35 | Ethical issues pertaining | <a href="#">#9</a>  | Documentation of approval by an appropriate ethics        | 8        |
| 36 |                           |                     |                                                           |          |
| 37 | to human subjects         |                     | review board and participant consent, or explanation      |          |
| 38 |                           |                     |                                                           |          |
| 39 |                           |                     | for lack thereof; other confidentiality and data security |          |
| 40 |                           |                     |                                                           |          |
| 41 |                           |                     | issues                                                    |          |
| 42 |                           |                     |                                                           |          |
| 43 |                           |                     |                                                           |          |
| 44 |                           |                     |                                                           |          |
| 45 | Data collection methods   | <a href="#">#10</a> | Types of data collected; details of data collection       | 7, Fig.2 |
| 46 |                           |                     |                                                           |          |
| 47 |                           |                     | procedures including (as appropriate) start and stop      |          |
| 48 |                           |                     |                                                           |          |
| 49 |                           |                     | dates of data collection and analysis, iterative          |          |
| 50 |                           |                     |                                                           |          |
| 51 |                           |                     | process, triangulation of sources / methods, and          |          |
| 52 |                           |                     |                                                           |          |
| 53 |                           |                     | modification of procedures in response to evolving        |          |
| 54 |                           |                     |                                                           |          |
| 55 |                           |                     | study findings; rationale                                 |          |
| 56 |                           |                     |                                                           |          |
| 57 |                           |                     |                                                           |          |
| 58 |                           |                     |                                                           |          |
| 59 |                           |                     |                                                           |          |
| 60 |                           |                     |                                                           |          |

|    |                         |                     |                                                          |          |
|----|-------------------------|---------------------|----------------------------------------------------------|----------|
| 1  | Data collection         | <a href="#">#11</a> | Description of instruments (e.g. interview guides,       | 6,7      |
| 2  |                         |                     | questionnaires) and devices (e.g. audio recorders)       |          |
| 3  | instruments and         |                     | used for data collection; if / how the instruments(s)    |          |
| 4  |                         |                     | changed over the course of the study                     |          |
| 5  | technologies            |                     |                                                          |          |
| 6  |                         |                     |                                                          |          |
| 7  |                         |                     |                                                          |          |
| 8  |                         |                     |                                                          |          |
| 9  |                         |                     |                                                          |          |
| 10 |                         |                     |                                                          |          |
| 11 | Units of study          | <a href="#">#12</a> | Number and relevant characteristics of participants,     | 8,       |
| 12 |                         |                     | documents, or events included in the study; level of     |          |
| 13 |                         |                     | participation (could be reported in results)             | Table 1  |
| 14 |                         |                     |                                                          |          |
| 15 |                         |                     |                                                          |          |
| 16 |                         |                     |                                                          |          |
| 17 |                         |                     |                                                          |          |
| 18 |                         |                     |                                                          |          |
| 19 | Data processing         | <a href="#">#13</a> | Methods for processing data prior to and during          | 7, Fig.2 |
| 20 |                         |                     | analysis, including transcription, data entry, data      |          |
| 21 |                         |                     | management and security, verification of data            |          |
| 22 |                         |                     | integrity, data coding, and 4nonymization /              |          |
| 23 |                         |                     | deidentification of excerpts                             |          |
| 24 |                         |                     |                                                          |          |
| 25 |                         |                     |                                                          |          |
| 26 |                         |                     |                                                          |          |
| 27 |                         |                     |                                                          |          |
| 28 |                         |                     |                                                          |          |
| 29 |                         |                     |                                                          |          |
| 30 |                         |                     |                                                          |          |
| 31 | Data analysis           | <a href="#">#14</a> | Process by which inferences, themes, etc. were           | 7, Fig.2 |
| 32 |                         |                     | identified and developed, including the researchers      |          |
| 33 |                         |                     | involved in data analysis; usually references a specific |          |
| 34 |                         |                     | paradigm or approach; rationale                          |          |
| 35 |                         |                     |                                                          |          |
| 36 |                         |                     |                                                          |          |
| 37 |                         |                     |                                                          |          |
| 38 |                         |                     |                                                          |          |
| 39 |                         |                     |                                                          |          |
| 40 |                         |                     |                                                          |          |
| 41 | Techniques to enhance   | <a href="#">#15</a> | Techniques to enhance trustworthiness and credibility    | 7        |
| 42 |                         |                     | of data analysis (e.g. member checking, audit trail,     |          |
| 43 | trustworthiness         |                     | triangulation); rationale                                |          |
| 44 |                         |                     |                                                          |          |
| 45 |                         |                     |                                                          |          |
| 46 |                         |                     |                                                          |          |
| 47 |                         |                     |                                                          |          |
| 48 | <b>Results/findings</b> |                     |                                                          |          |
| 49 |                         |                     |                                                          |          |
| 50 |                         |                     |                                                          |          |
| 51 | Syntheses and           | <a href="#">#16</a> | Main findings (e.g. interpretations, inferences, and     | 8-11     |
| 52 |                         |                     | themes); might include development of a theory or        |          |
| 53 | interpretation          |                     | model, or integration with prior research or theory      |          |
| 54 |                         |                     |                                                          |          |
| 55 |                         |                     |                                                          |          |
| 56 |                         |                     |                                                          |          |
| 57 |                         |                     |                                                          |          |
| 58 |                         |                     |                                                          |          |
| 59 |                         |                     |                                                          |          |
| 60 |                         |                     |                                                          |          |

|    |                         |                     |                                                          |          |
|----|-------------------------|---------------------|----------------------------------------------------------|----------|
| 1  | Links to empirical data | <a href="#">#17</a> | Evidence (e.g. quotes, field notes, text excerpts,       | Appendix |
| 2  |                         |                     | photographs) to substantiate analytic findings           | A        |
| 3  |                         |                     |                                                          |          |
| 4  |                         |                     |                                                          |          |
| 5  |                         |                     |                                                          |          |
| 6  | <b>Discussion</b>       |                     |                                                          |          |
| 7  |                         |                     |                                                          |          |
| 8  |                         |                     |                                                          |          |
| 9  |                         |                     |                                                          |          |
| 10 | Intergration with prior | <a href="#">#18</a> | Short summary of main findings; explanation of how       | 11-13    |
| 11 | work, implications,     |                     | findings and conclusions connect to, support,            |          |
| 12 |                         |                     |                                                          |          |
| 13 |                         |                     |                                                          |          |
| 14 | transferability and     |                     | elaborate on, or challenge conclusions of earlier        |          |
| 15 |                         |                     |                                                          |          |
| 16 | contribution(s) to the  |                     | scholarship; discussion of scope of application /        |          |
| 17 |                         |                     |                                                          |          |
| 18 | field                   |                     | generalizability; identification of unique               |          |
| 19 |                         |                     |                                                          |          |
| 20 |                         |                     |                                                          |          |
| 21 |                         |                     | contributions(s) to scholarship in a discipline or field |          |
| 22 |                         |                     |                                                          |          |
| 23 |                         |                     |                                                          |          |
| 24 | Limitations             | <a href="#">#19</a> | Trustworthiness and limitations of findings              | 13,14    |
| 25 |                         |                     |                                                          |          |
| 26 |                         |                     |                                                          |          |
| 27 | <b>Other</b>            |                     |                                                          |          |
| 28 |                         |                     |                                                          |          |
| 29 |                         |                     |                                                          |          |
| 30 | Conflicts of interest   | <a href="#">#20</a> | Potential sources of influence of perceived influence    | 15       |
| 31 |                         |                     |                                                          |          |
| 32 |                         |                     | on study conduct and conclusions; how these were         |          |
| 33 |                         |                     |                                                          |          |
| 34 |                         |                     | managed                                                  |          |
| 35 |                         |                     |                                                          |          |
| 36 |                         |                     |                                                          |          |
| 37 |                         |                     |                                                          |          |
| 38 | Funding                 | <a href="#">#21</a> | Sources of funding and other support; role of funders    | 15       |
| 39 |                         |                     |                                                          |          |
| 40 |                         |                     | in data collection, interpretation and reporting         |          |
| 41 |                         |                     |                                                          |          |
| 42 |                         |                     |                                                          |          |

None The SRQR checklist is distributed with permission of Wolters Kluwer © 2014 by the Association of American Medical Colleges. This checklist can be completed online using <https://www.goodreports.org/>, a tool made by the [EQUATOR Network](#) in collaboration with [Penelope.ai](#)
