# Supplementary material for: How far are we from a medication use process aiming at well-informed adherent patients with long-term medications in Finland? Qualitative study
Source: PubMed Central journal article supplement — BMJ Open. 2020 Jun 21;10(6):e036526. doi: 10.1136/bmjopen-2019-036526 (PMC7307543; doi:10.1136/bmjopen-2019-036526), 2020-06-21
Supplement: bmjopen-2019-036526supp001.pdf [file bmjopen-2019-036526supp001.pdf]

## Appendix A. Evolution and milestones of medicines information to patients in Finland since the 1960s.

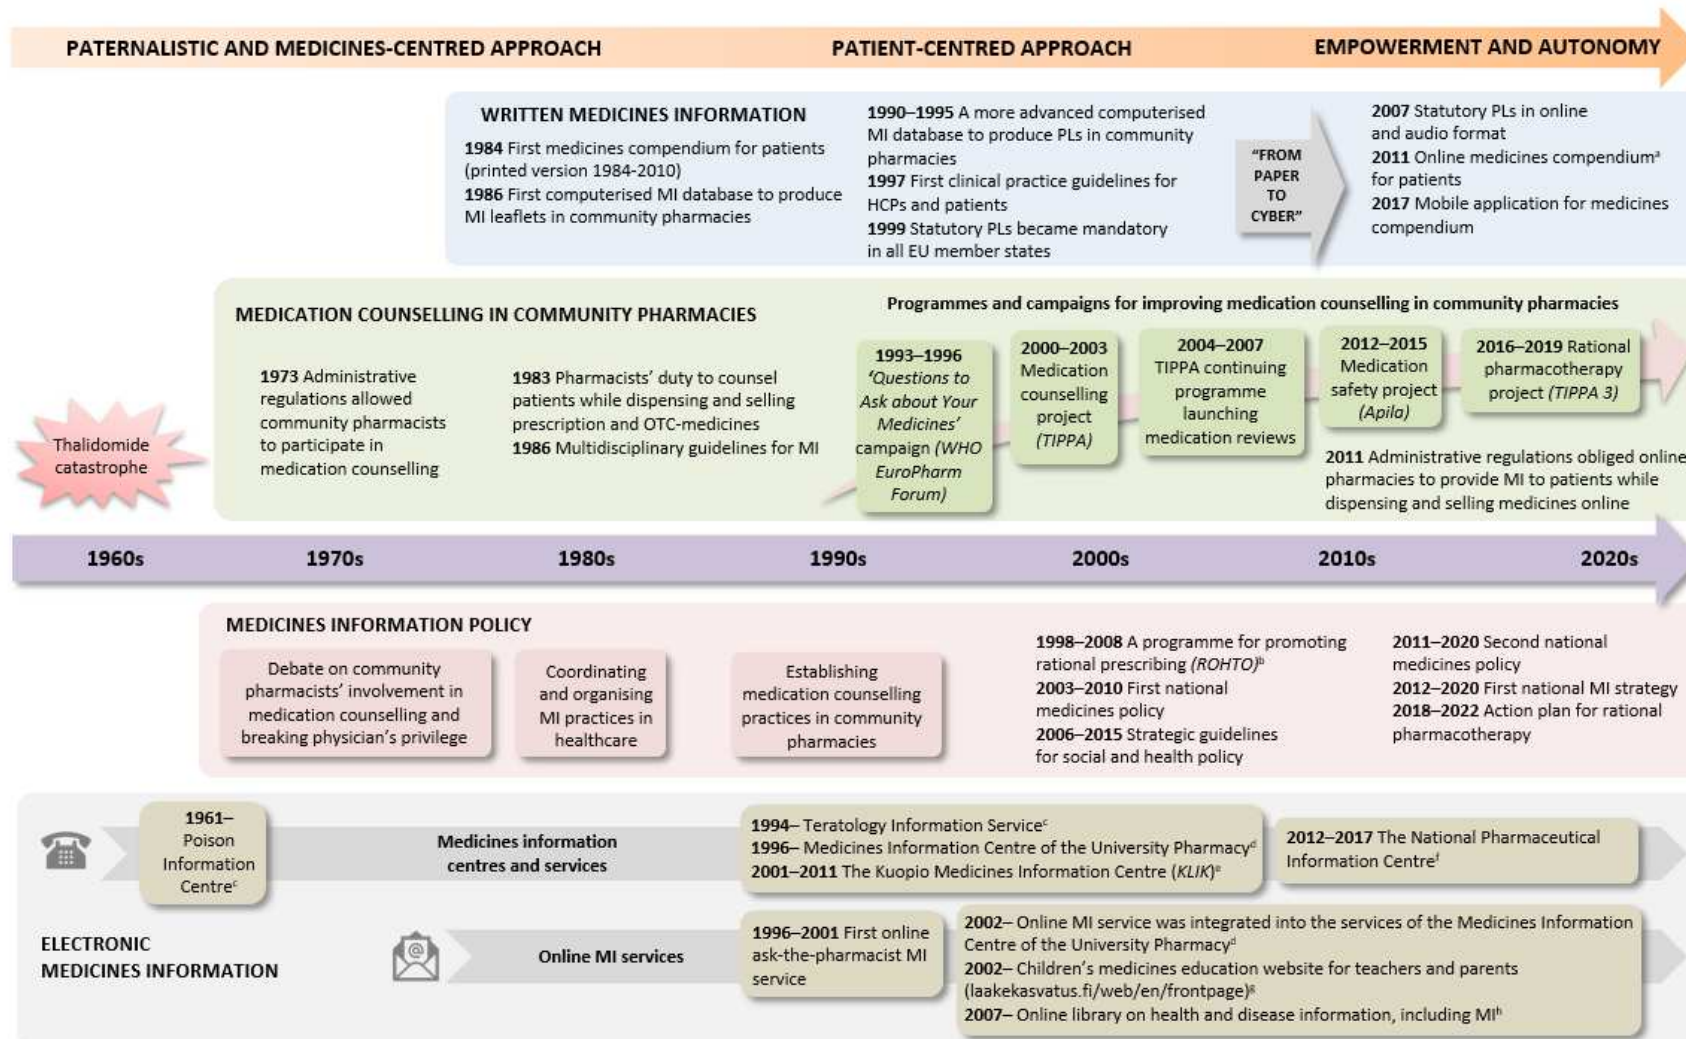

EU=European Union, HCP=healthcare professional, MI=medicines information, OTC=over-the-counter, PL=package leaflet. <sup>a</sup>Integrated into the online health library, <sup>b</sup>ROHTO initially worked as a project in 1998–2001, and after that it operated as the Centre for Pharmacotherapy Development ROHTO under the Ministry of Social Affairs and Health (2002–2008), <sup>c</sup>Service provided by the Hospital District of Helsinki and Uusimaa (HUS), <sup>d</sup>Service provided by the University Pharmacy which is owned by University of Helsinki, <sup>e</sup>Owned by the University of Kuopio/the University of Eastern Finland, <sup>f</sup>Owned by the University of Eastern Finland and Pharmaceutical Information Centre in 2012–2014, owned by Pharmaceutical Information Centre since 2015, and provided MI service to consumers until 2017, <sup>g</sup>Website portal owned by the University of Kuopio/the University of Eastern Finland during 2002–2011, since 2012 owned by the Finnish Medicines Agency Fimea, <sup>h</sup>Owned by Duodecim Publishing Company Ltd.
