# Supplementary figures and images for: How far are we from a medication use process aiming at well-informed adherent patients with long-term medications in Finland? Qualitative study
Source: PubMed Central journal article supplement — BMJ Open. 2020 Jun 21;10(6):e036526. doi: 10.1136/bmjopen-2019-036526 (PMC7307543; doi:10.1136/bmjopen-2019-036526), 2020-06-21

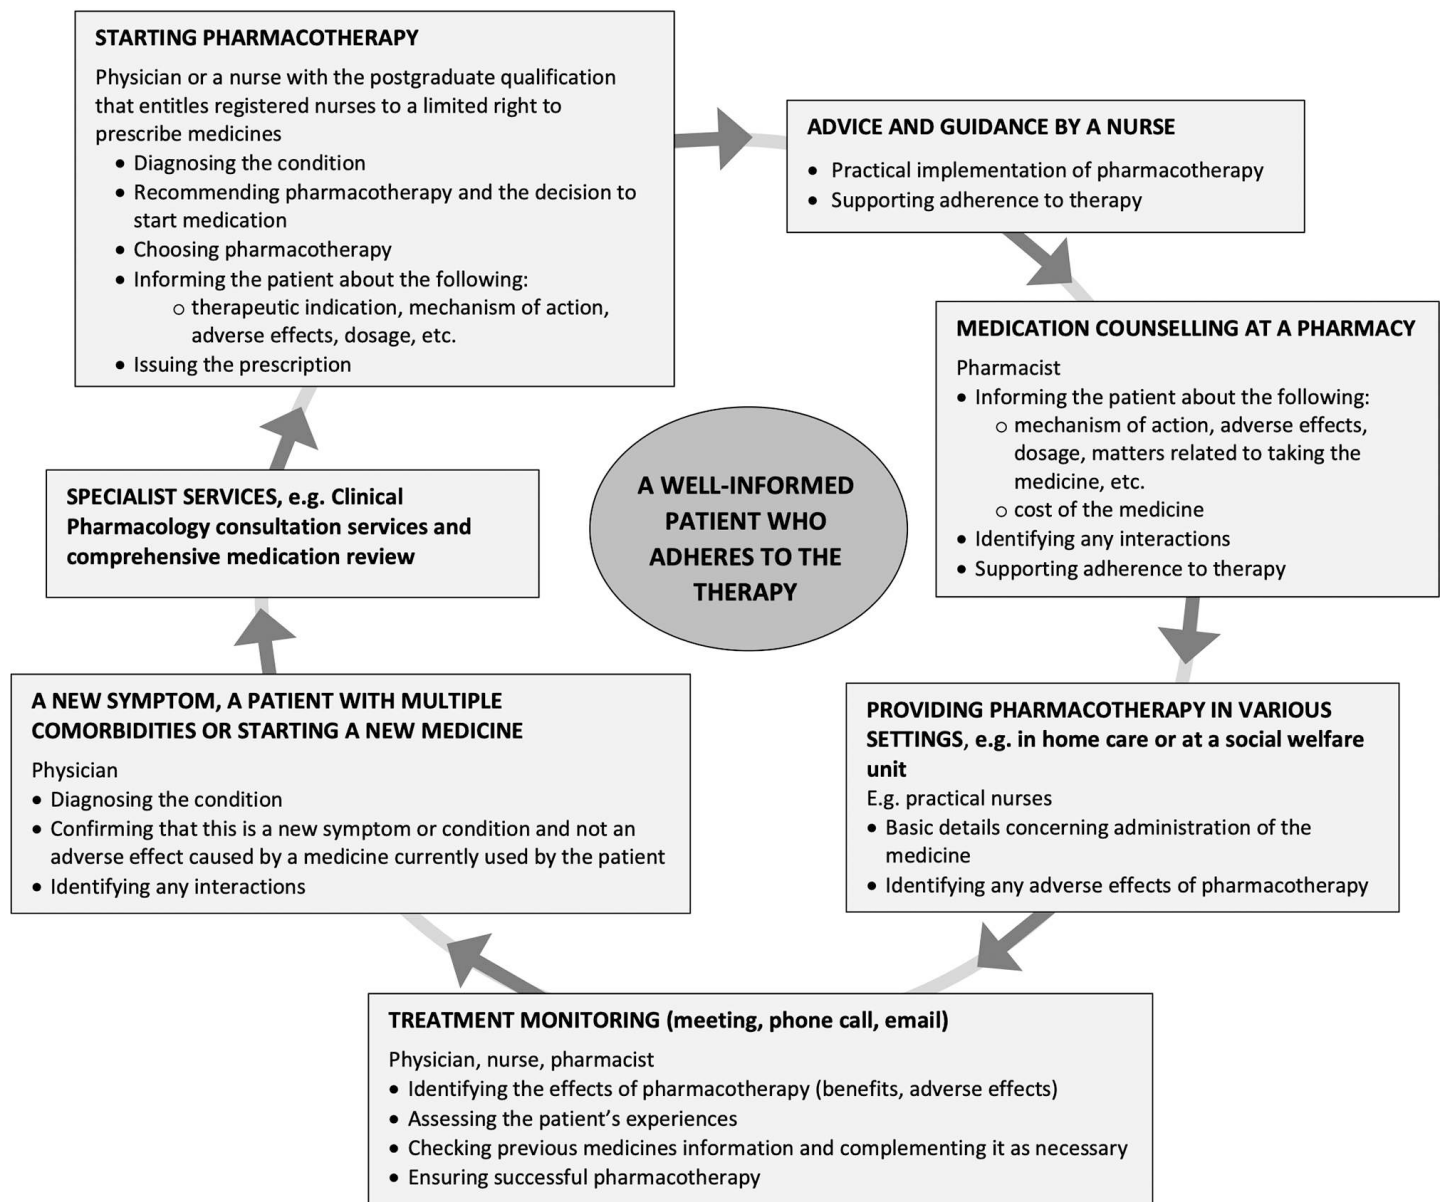

Supplement: bmjopen-2019-036526supp002.pdf [file bmjopen-2019-036526supp002.pdf]
